# Supplementary material
Source: PubMed Central journal article supplement (PMC6990848)
Supplement: jamaoncol-e195582-s001.pdf [file jamaoncol-e195582-s001.pdf]

## Supplementary Online Content

Yeh JM, Ward ZJ, Chaudhry A, et al. Life Expectancy of adult survivors of childhood cancer over 3 decades. *JAMA Oncol*. Published online January 2, 2020. doi:10.1001/jamaoncol.2019.5582

**eMethods.** Additional Methodological Details on Model Development

**eFigure 1.** Model Diagram

**eFigure 2.** Projected Gap in Life Expectancy Among Survivors Diagnosed in 1970s, 1980s, and 1990s: Overall Cohort and Acute Lymphoblastic Leukemia (ALL) Subgroup

**eFigure 3.** Cohort Composition by Treatment Era

**eFigure 4.** Projected Cumulative Mortality Risks Among Survivors Diagnosed in 1970s, 1980s, and 1990s: Overall Cohort and Acute Lymphoblastic Leukemia (ALL) Subgroup

**eFigure 5.** Projected Relative 10-Year Mortality Risk Among Survivors Diagnosed in 1970-79, 1980-89, and 1990-99 by Attained Age (Compared to General Population)

**eFigure 6.** Cause-Specific Attributable Proportion of Projected 10-Year Mortality Risk Conditional Upon Surviving to Age 30, 40, 50, and 60 Among Survivors Diagnosed in 1970-79, 1980-89, and 1990-99

**eTable 1.** Patient Characteristics and Treatment Subgroup: Overall Cohort of Survivors of Childhood and Adolescent Cancer

**eTable 2.** Model Results: Cause-Specific Cumulative Risks by Age 30, 40, 50, 60, and 70

**eTable 3.** Patient Characteristics and Therapeutic Exposures: Chemotherapy Alone Subgroup

**eTable 4.** Patient Characteristics and Therapeutic Exposures: Radiotherapy Alone Subgroup

**eTable 5.** Patient Characteristics and Therapeutic Exposures: Chemoradiotherapy Subgroup

**eTable 6.** Patient Characteristics and Therapeutic Exposures: Acute Lymphoblastic Leukemia Subgroup

This supplementary material has been provided by the authors to give readers additional information about their work.

## eMethods. Additional methodological details on model development

### Model Inputs

#### Childhood Cancer Survivor Study (CCSS)

We obtained individual-level data for 22,150 survivors in the Childhood Cancer Survivor Study (CCSS) who completed the baseline questionnaire and were covered by the National Death Index. Each respondent was weighted with inverse probability weights (IPW) based on their probability of participation ( $p[\text{Sampled}] * p[\text{Included in subset}]$ ) so that our results for the modeled cohort can be generalized to the larger population of childhood cancer survivors. Treatment exposure groups were sampled based on 10 imputed datasets for those with missing values. Due to small sample size we grouped “None” and “Surgery only” together into one exposure group.

Here we present the reported counts and mean imputed counts across the 10 datasets.

| Code | Treatment Group                     | Reported # | Imputed # |
|------|-------------------------------------|------------|-----------|
| 0    | No treatment/Missing                | 1,769      | 78.4      |
| 1    | Surgery only                        | 1,721      | 1,831.4   |
| 2    | Chemotherapy only (no radiotherapy) | 7,144      | 7,607.4   |
| 3    | Radiotherapy only (no chemotherapy) | 1,916      | 2,009.8   |
| 4    | Chemoradiotherapy                   | 9,600      | 10,623    |

#### Mortality Rates

Using data from the CCSS, we estimated late mortality rates for each treatment exposure group and era for the following years since diagnosis intervals: 5-9, 10-14, 15-19, 20-24, 25-29, 30-34, and 35+ years. Specifically, based on International Classification of Diseases, 9th and 10th Revisions (ICD-9 and ICD-10) criteria for cause of death, we estimated 1) annual mortality rates due to late recurrence or progression of original cancer, 2) annual excess mortality rates for external causes, including accidents, suicides, and poisonings (ICD-9 codes 800-999 and ICD-10 codes V00-V99, W00-W99, X00-X99, and Y00-Y89), and 3) annual excess mortality rates due to health-related causes, including subsequent (primary) cancers (ICD-9 codes 140-239 and ICD-10 codes C00-C97 and D10-D36), cardiac causes (ICD-9 codes 390-398, 402, 404, and 410-429 and ICD-10 codes I00-I02, I05-I09, I11, I13, I14, I20-I28, and I30-I52), pulmonary causes (ICD-9 codes 460-519 and ICD-10 codes J00-J99), and all other causes.

To inform background mortality rates, we obtained CDC cause-specific rates for the general population stratified by sex, age group, and year (1974-2014) for the following causes.

| Cause                              | Index |
|------------------------------------|-------|
| All-cause                          | 0     |
| Cardiac                            | 1     |
| External                           | 2     |
| Other                              | 3     |
| Pulmonary                          | 4     |
| Secondary malignant neoplasm (SMN) | 5     |
| Late recurrence                    | 6     |

The following age groups were used: <1, 1-4, 5-9, 10-14, 15-19, 20-24, 25-34, 35-44, 45-54, 55-64, 65-74, 75-84, 85+. Mortality rates were interpolated linearly from the midpoint of each age group. We held future mortality rates in the model equal to the latest observed rates in 2014.

## Model Calibration

To ensure that model outcomes were consistent with observed survival and cumulative mortality risks among survivors eligible for the CCSS when competing risks were considered, we used model calibration to identify plausible parameter sets of late recurrence and late effects mortality rates for each treatment subgroup by treatment era.

Specifically, for each subgroup, we set prior probability distributions for each model parameter based on the 95% confidence intervals (95% CIs) estimated from CCSS data. We then used searched the parameter space using a simulating annealing algorithm to identify parameter sets that were consistent with observed overall survival and cause-specific cumulative incidence at 5-9, 10-14, 15-19, 20-24, 25-29, 30-34, and 35+ years since diagnosis. Goodness-of-fit for each parameter set was calculated as the sum of squared distances of model predictions from these calibration targets, weighted inversely proportional to widths of their confidence intervals. We identified the 50 best-fitting parameter sets, which were then used as the basis of the analysis. As shown in Section 1.2.3, projected survival for survivors (overall cohort, treatment and ALL subgroups) diagnosed in 1970-79, 1980-89 and 1990-99 were consistent with observed CCSS data by years since diagnosis.

We used common random numbers within each calibration search to reduce stochastic noise (for both treatment imputation and microsimulation).

When sampling parameters we set a floor of 0 for AERs, except for External causes, as cancer treatment is unlikely to be protective for health-related causes of death. We enforced the relative shape of the AER curves when sampling. When parameter estimates had no data we projected the estimates using linear extrapolation from previous years based on the shape of the previous cohort. We also constrained these parameters to be lower than the previous cohort (except External, which were fit overall). We also constrained Late Recurrence mortality rates to be decreasing by years since diagnosis (within era).

## Scores

Here we plot the calibration scores and the top 50 sets (highlighted in red).

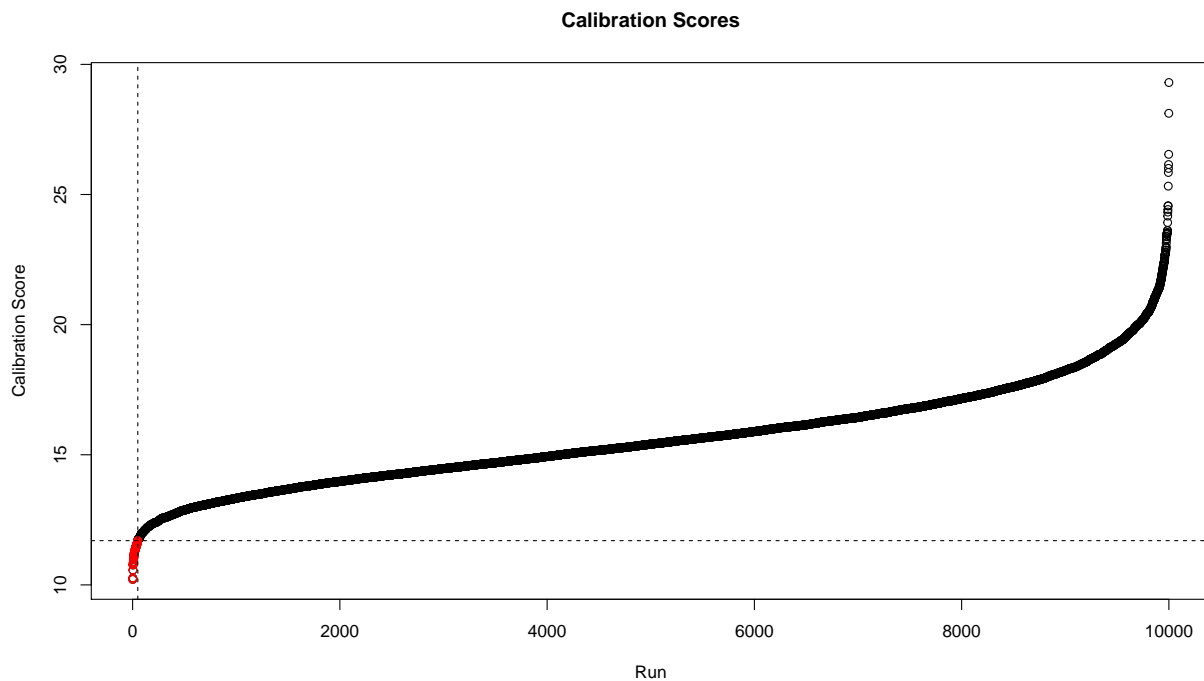

## Calibrated Parameters

Here we compare our treatment era-specific calibrated parameters to the estimates based on CCSS data. Black lines indicate CCSS estimates (solid = mean, dashed = 95% CI), and blue lines indicate parameter sets identified via calibration.

### Late recurrence mortality (annual rate)

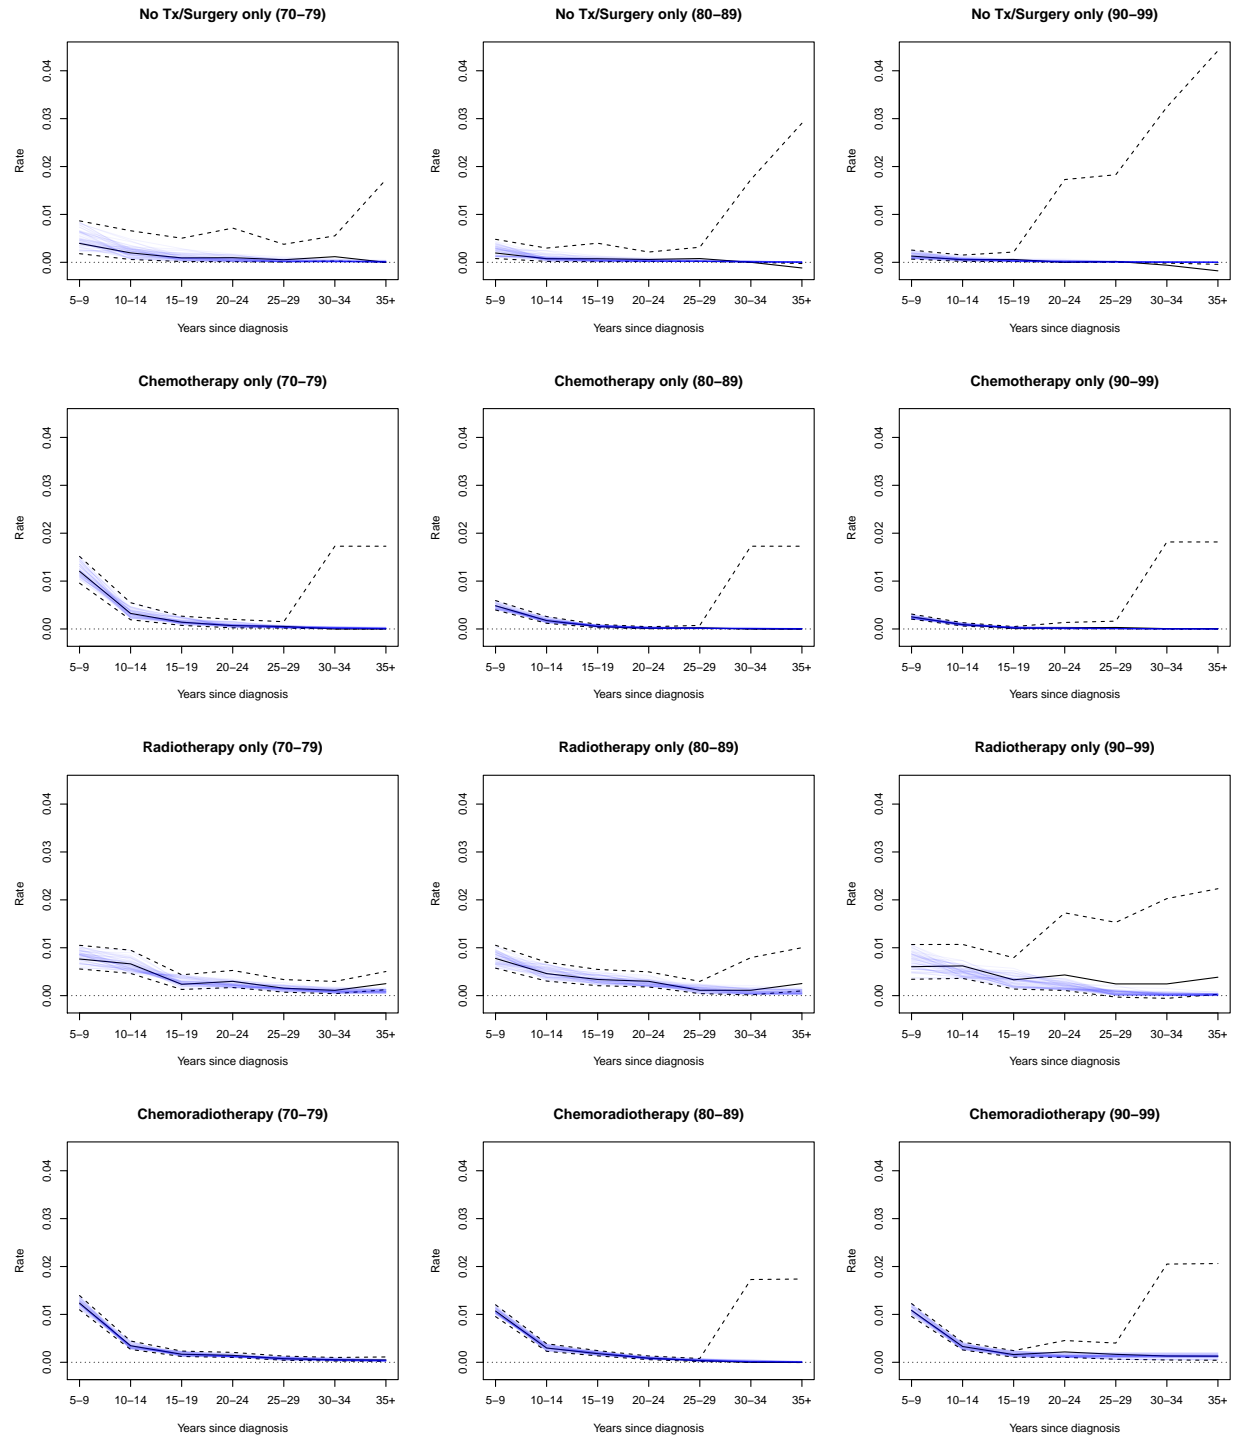

## Absolute excess risk (AER) for late effects (annual rate)

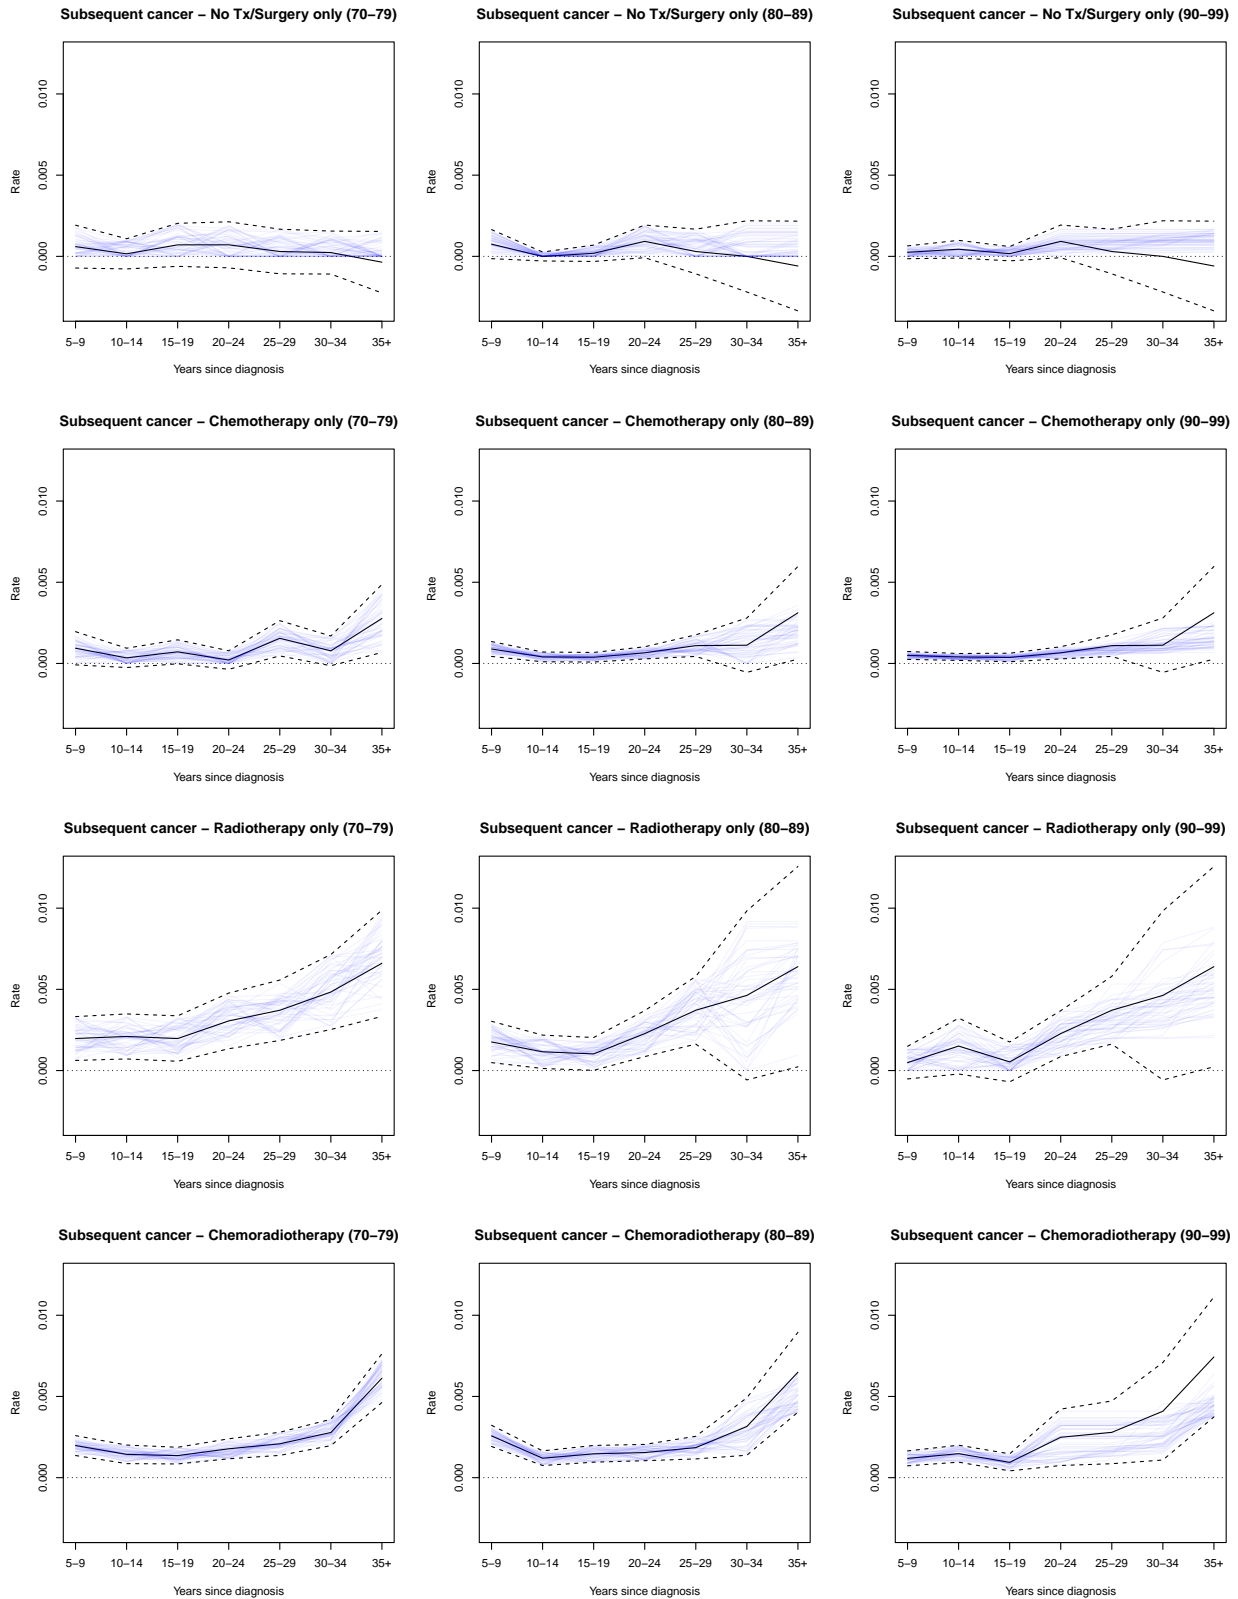

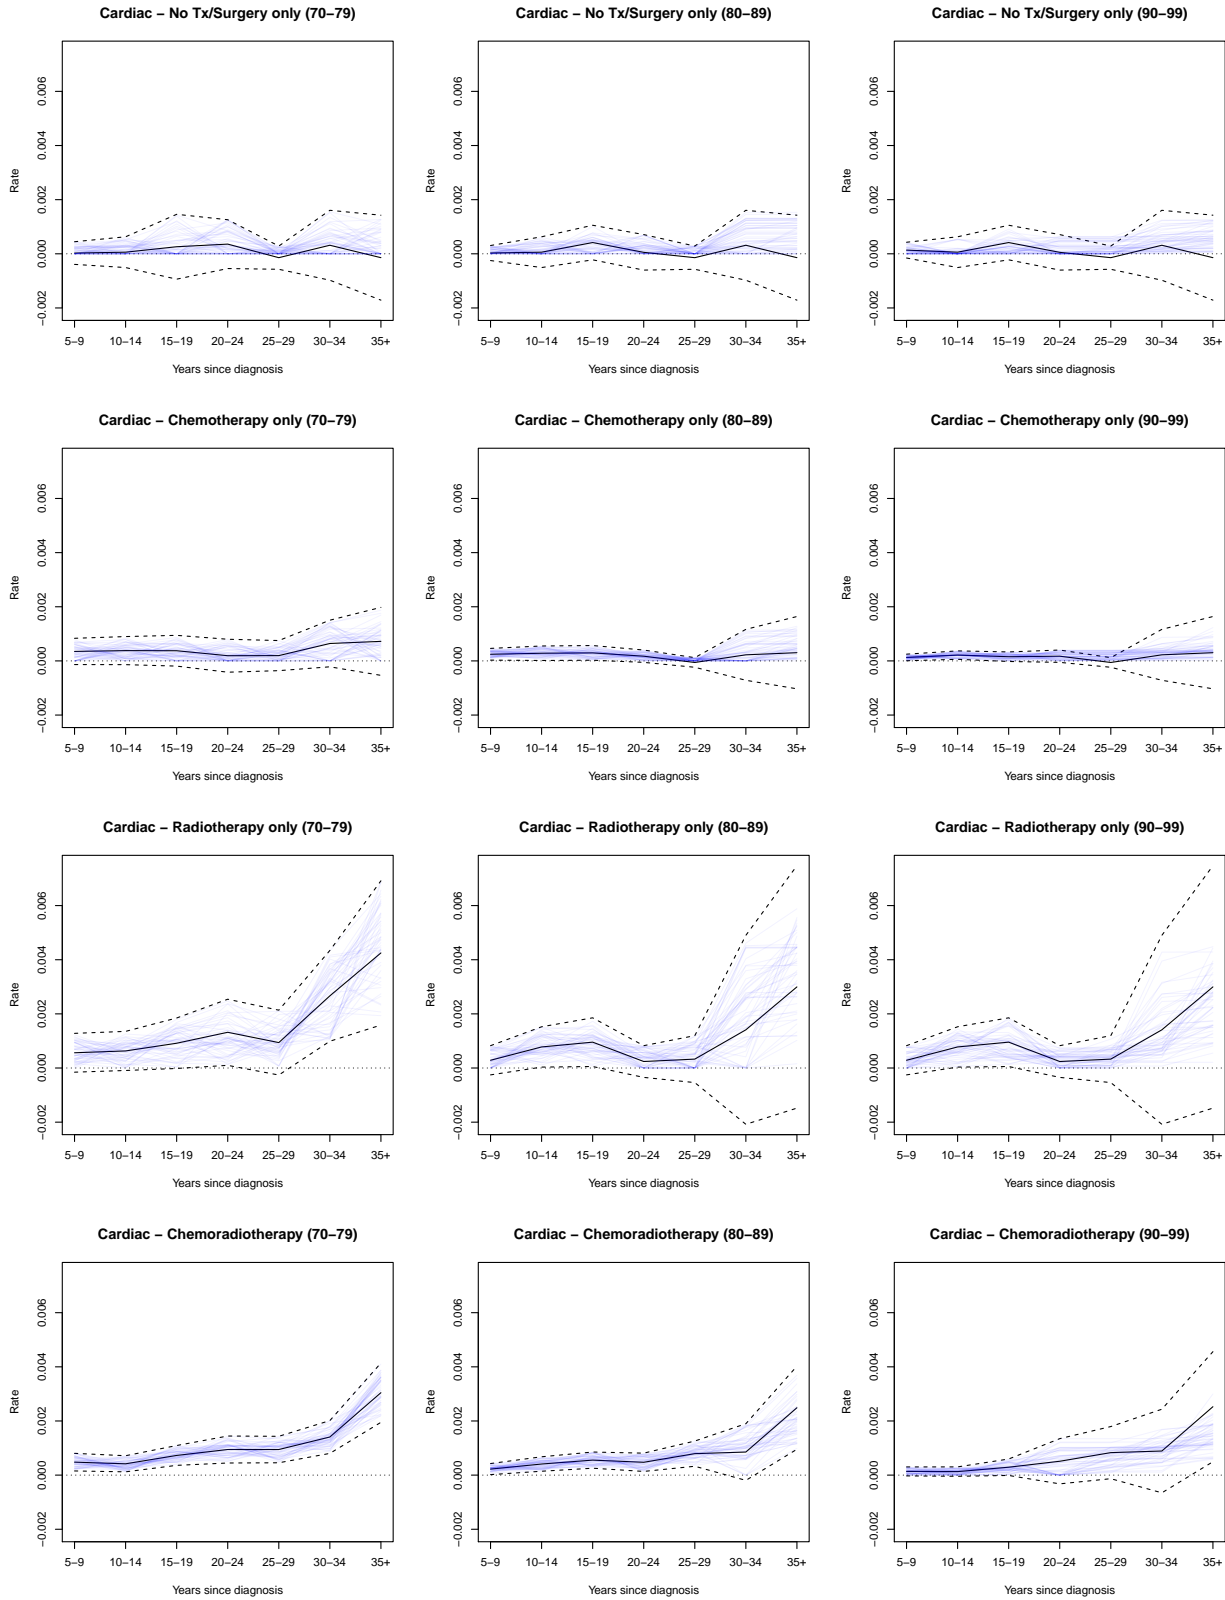

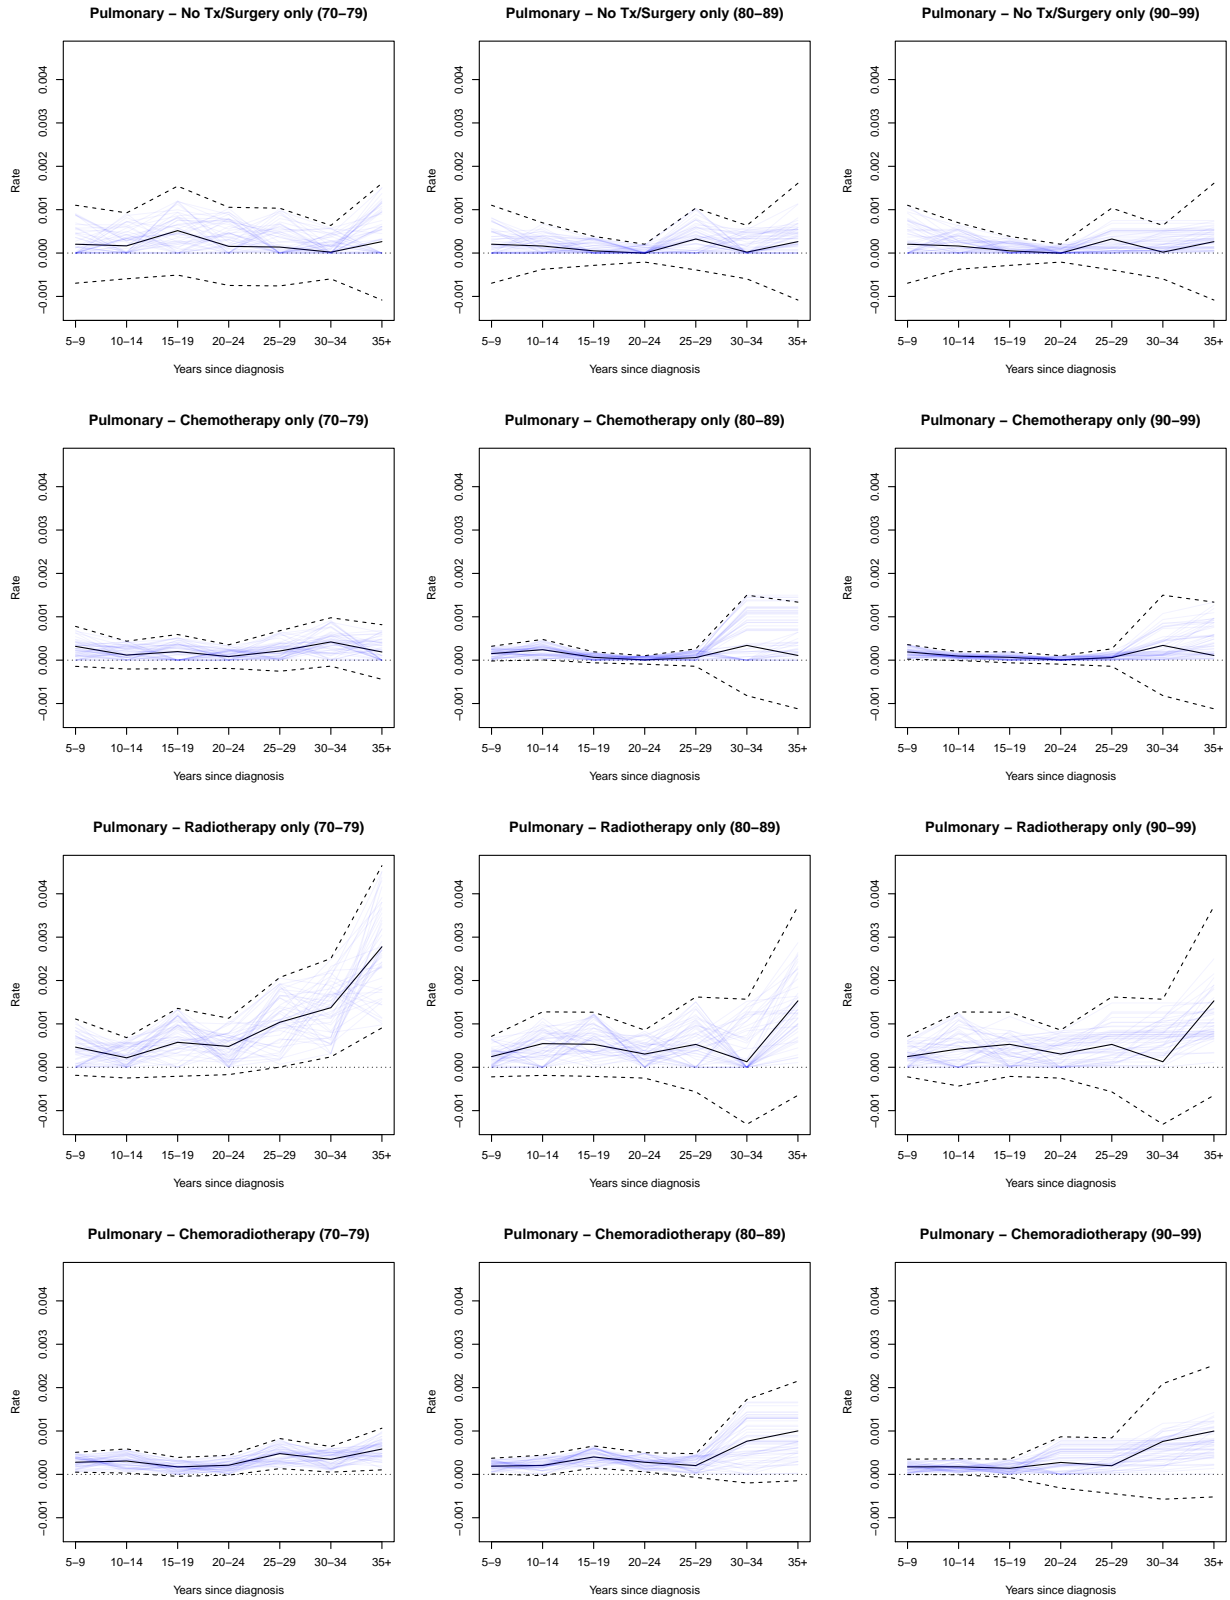

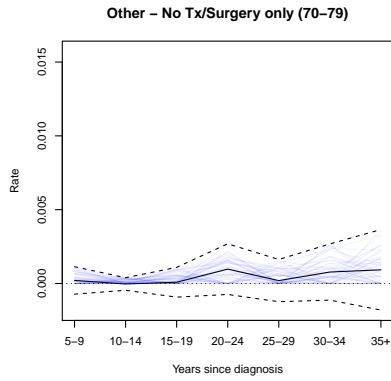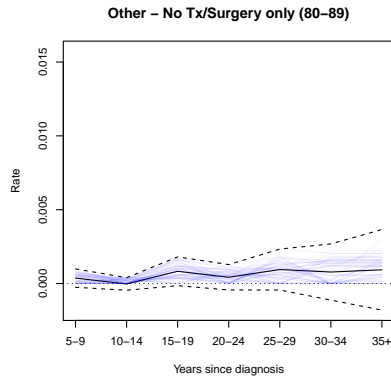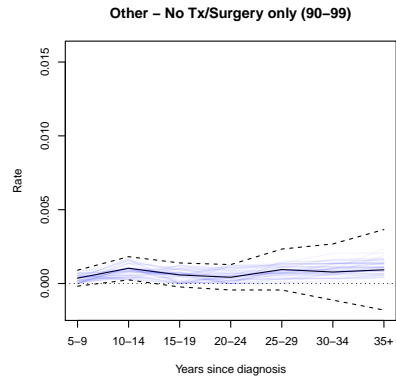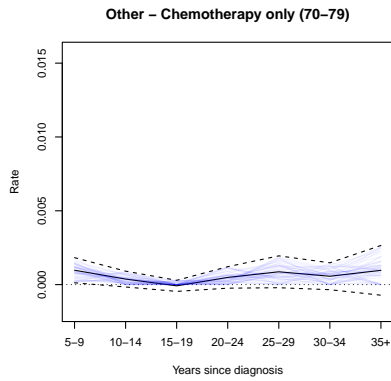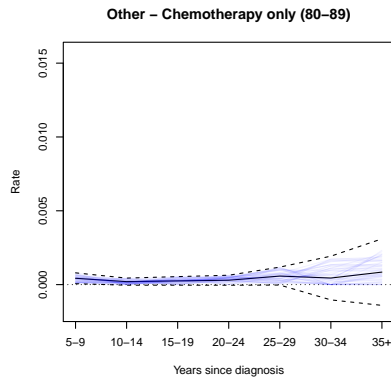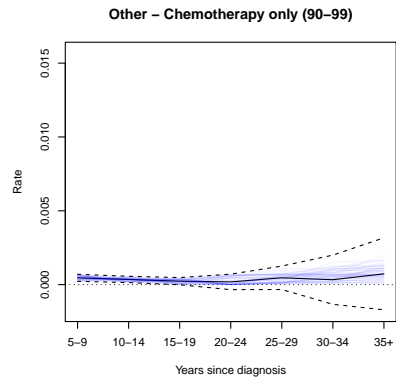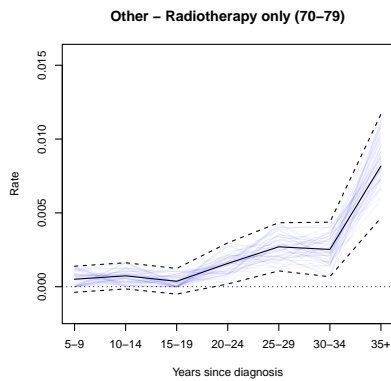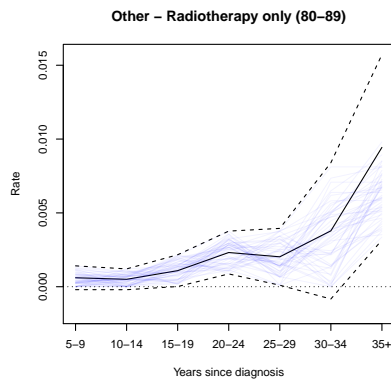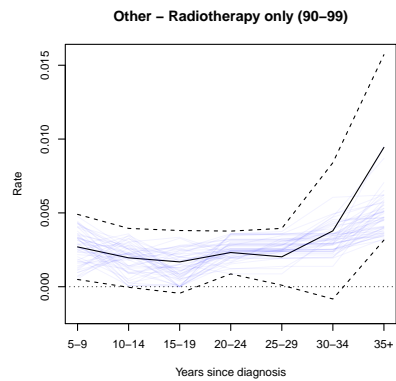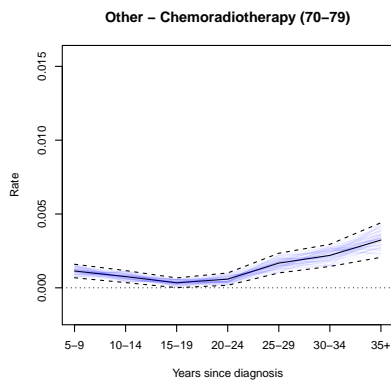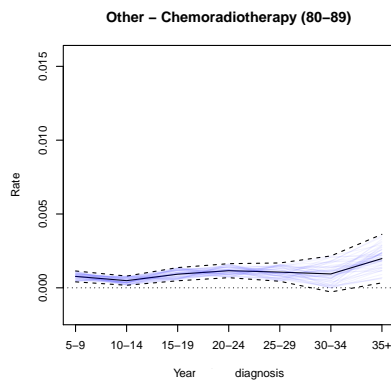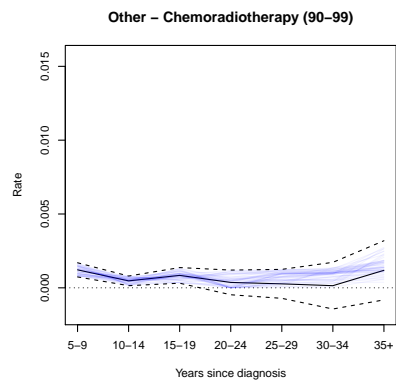



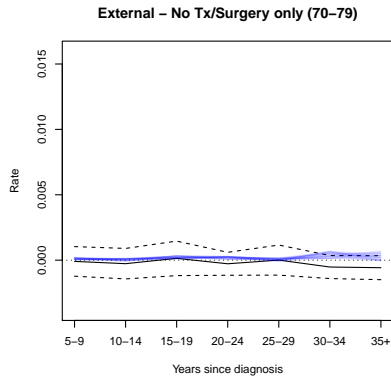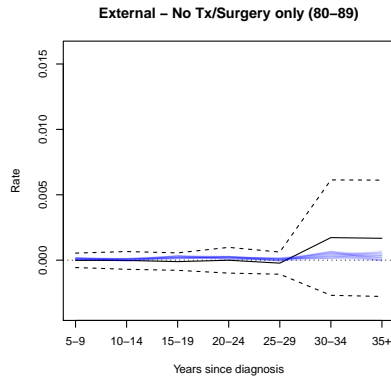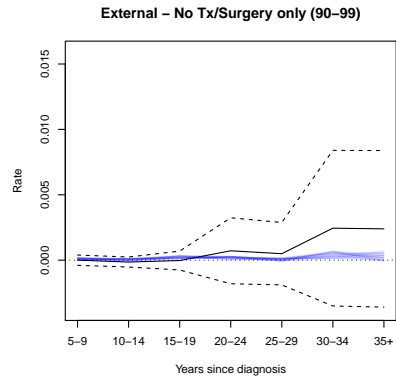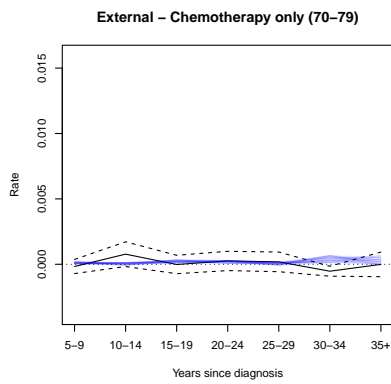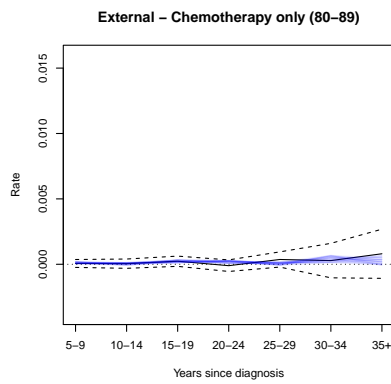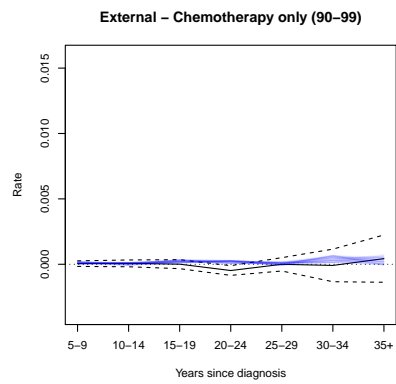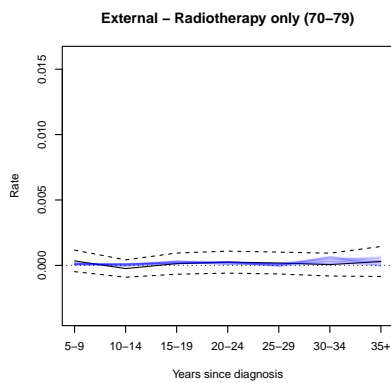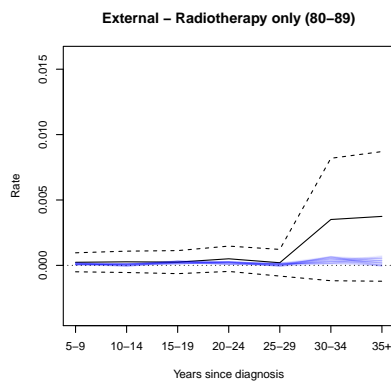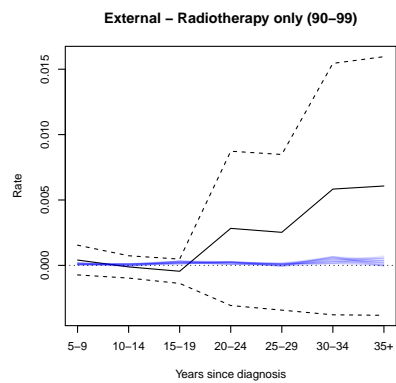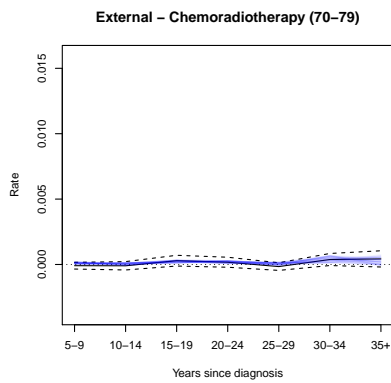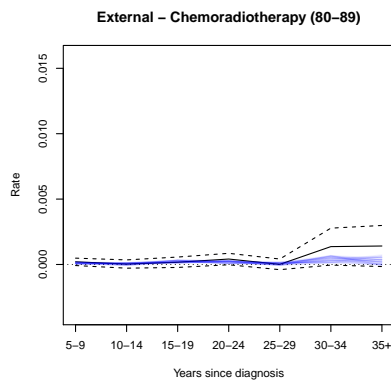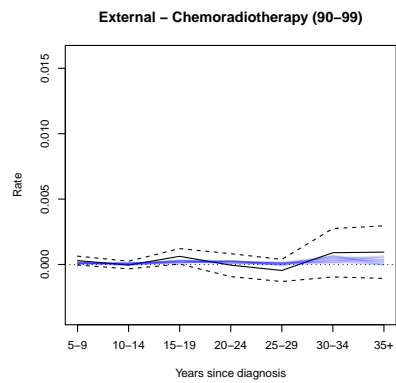

## Calibration Targets

Here we plot our calibrated model estimates of survival (overall) and cumulative mortality (cause-specific) by years since diagnosis compared to the observed CCSS estimates (shown in black). Red = modeled survivors. Shaded regions = 95% uncertainty intervals (UI) among 1000 iterations.

### Overall

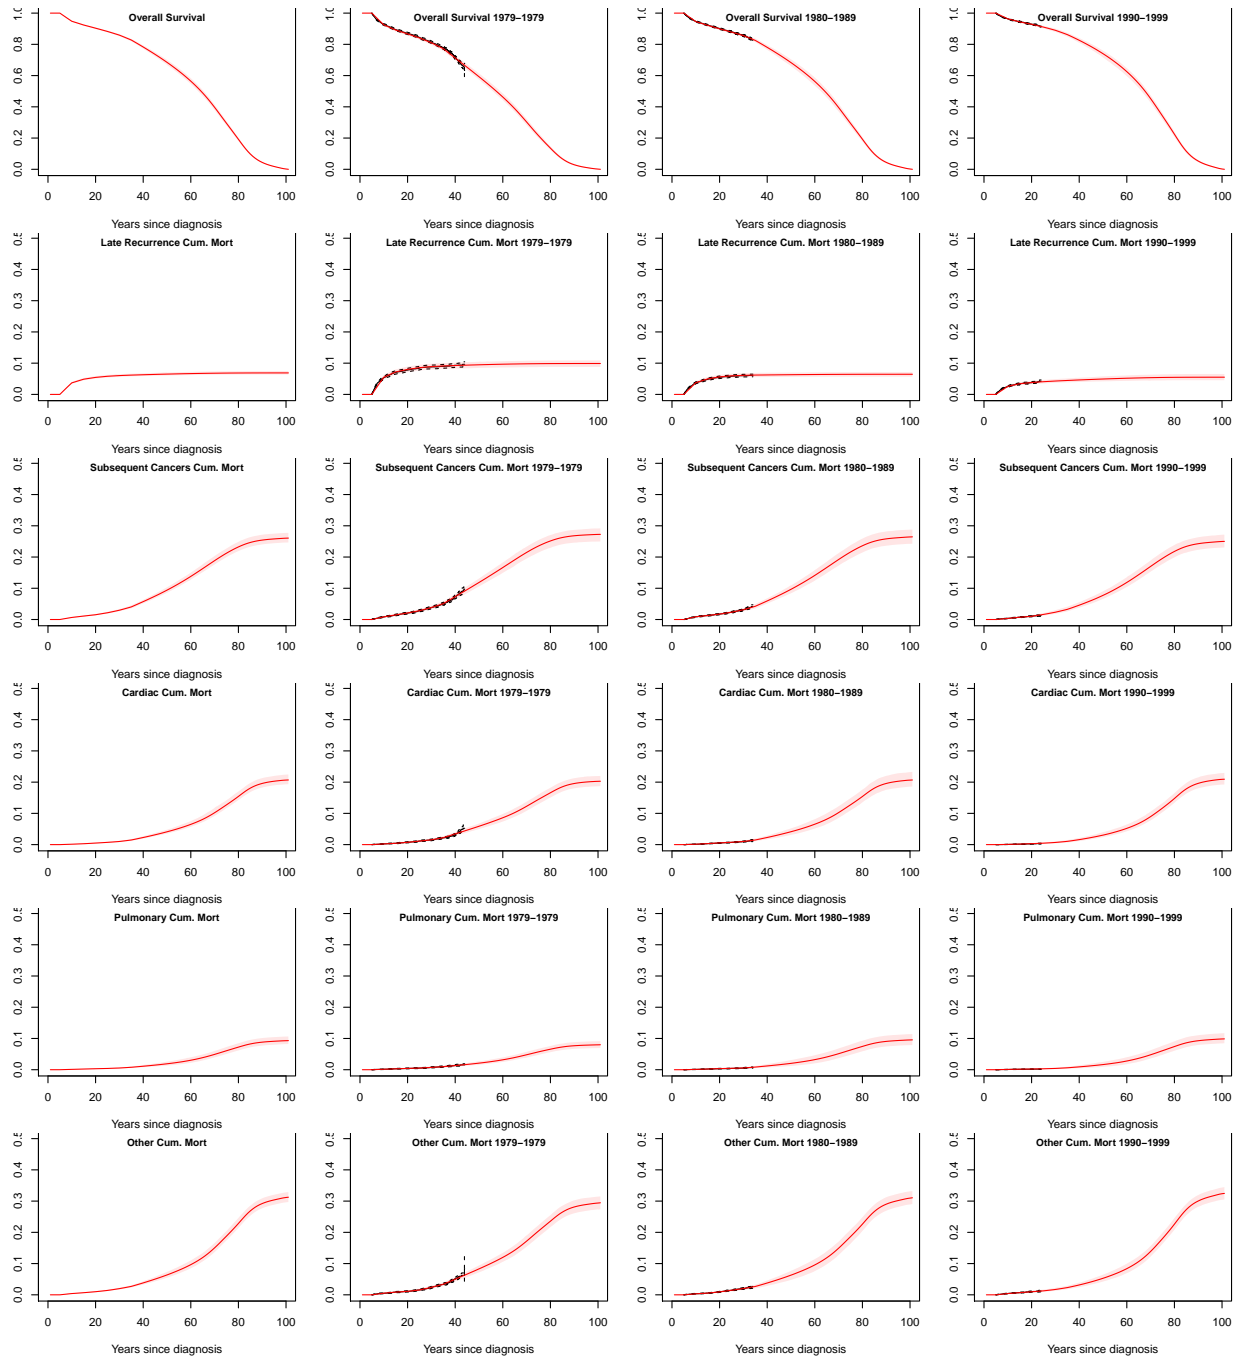

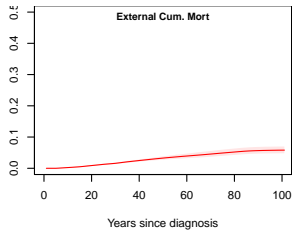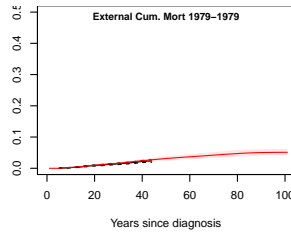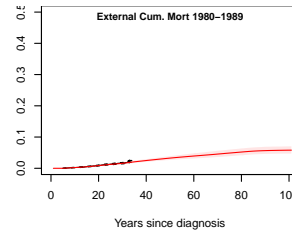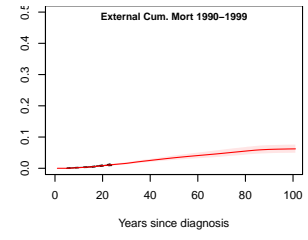

# No Treatment/Surgery Only

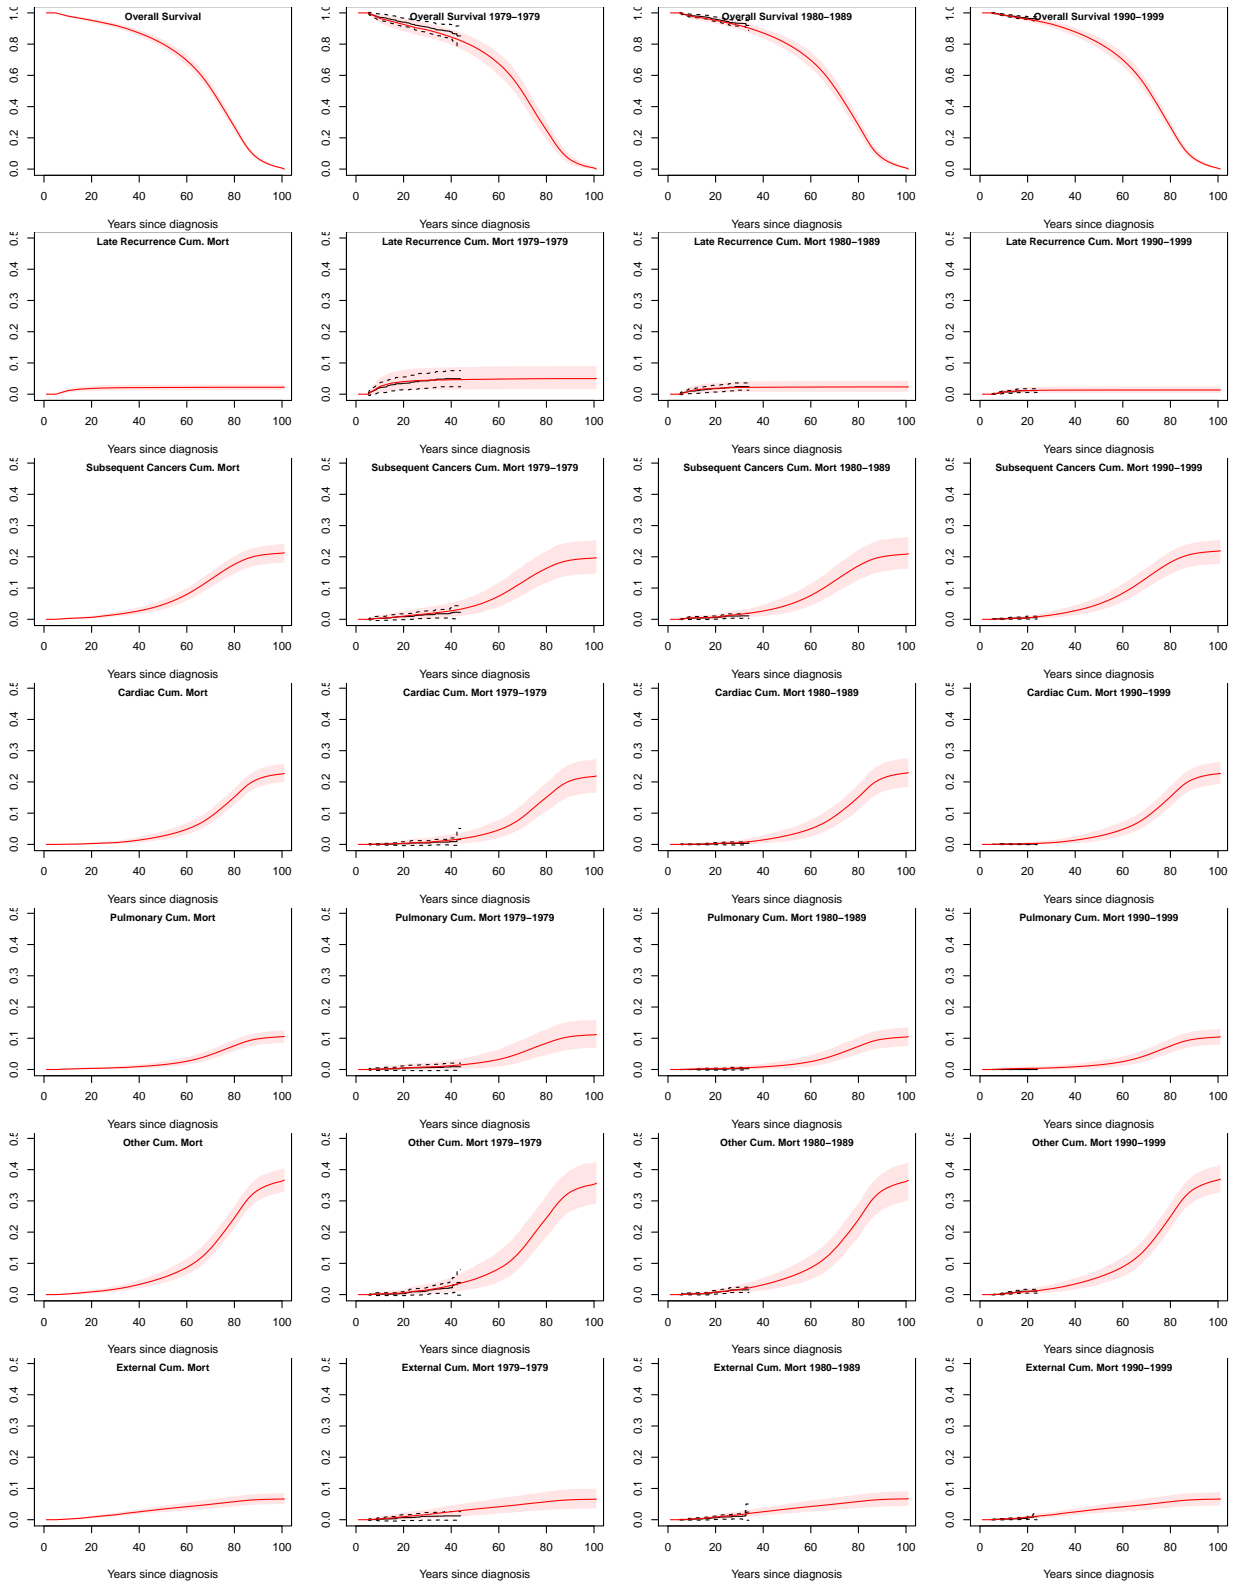

# Chemotherapy Only

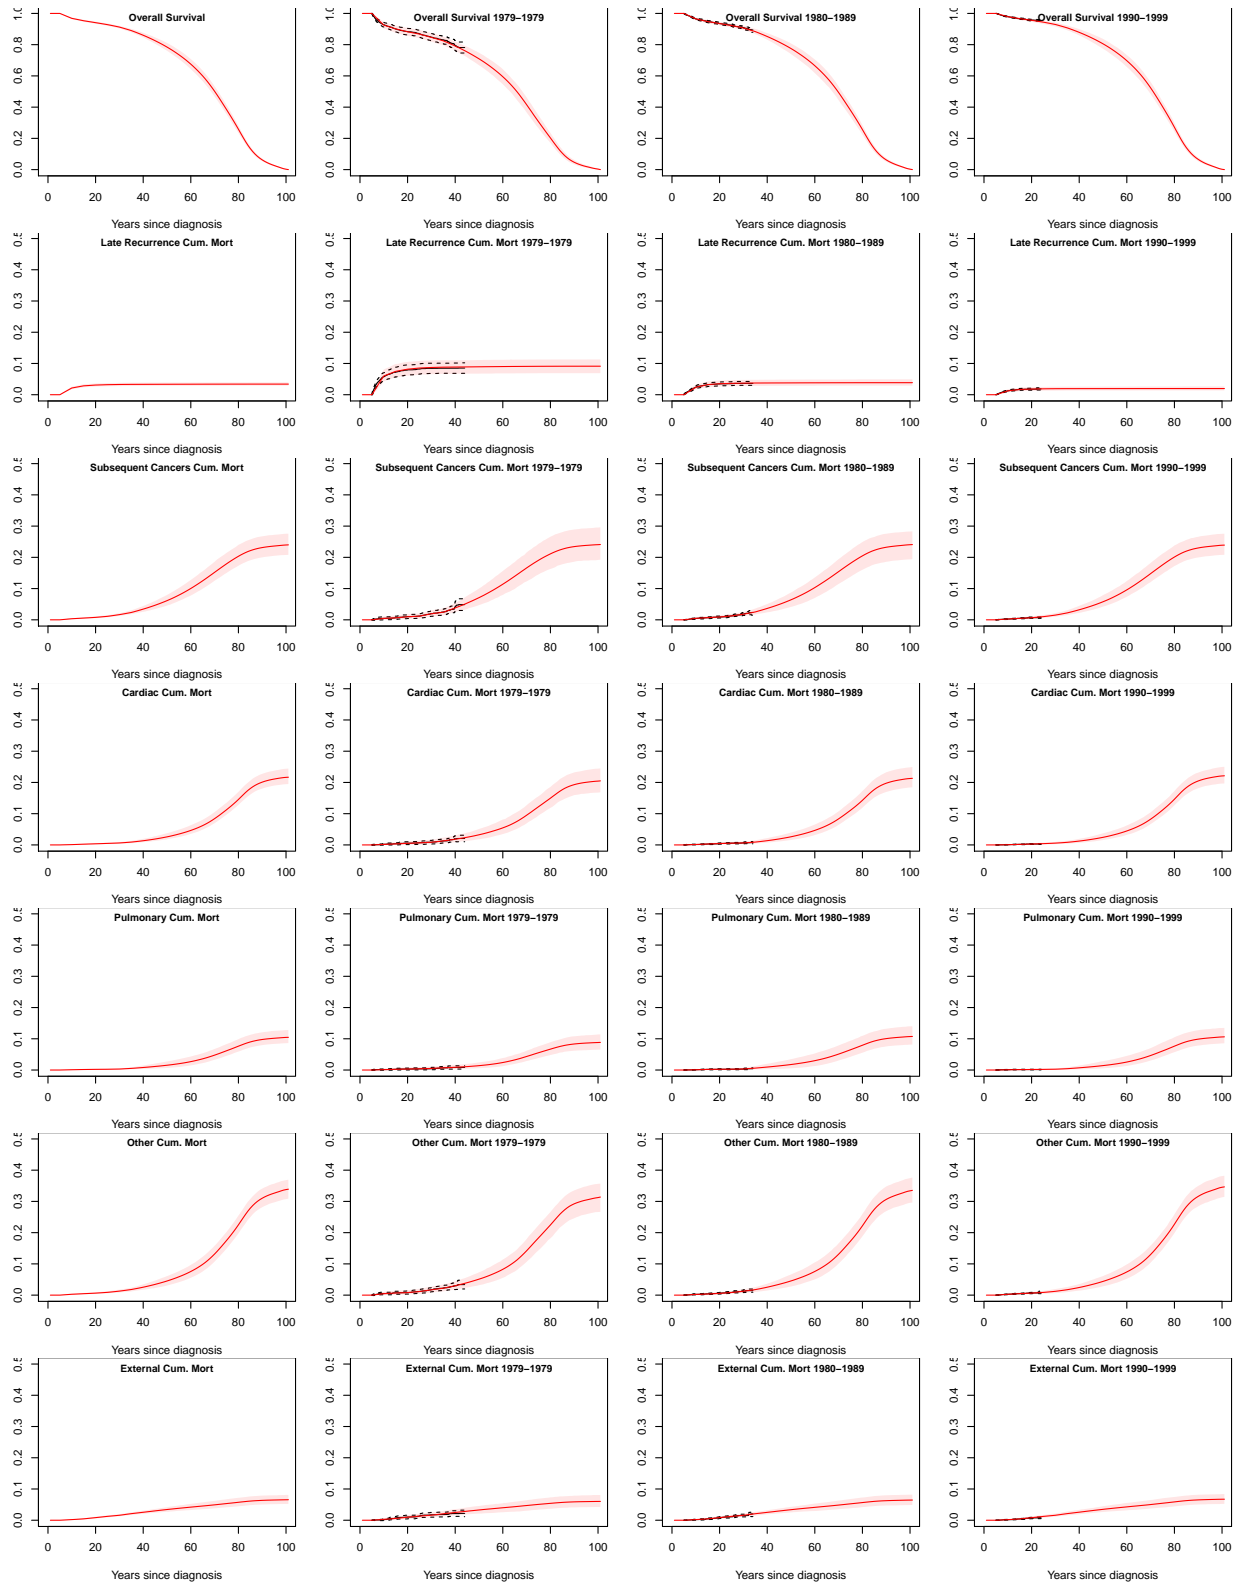

# Radiotherapy Only

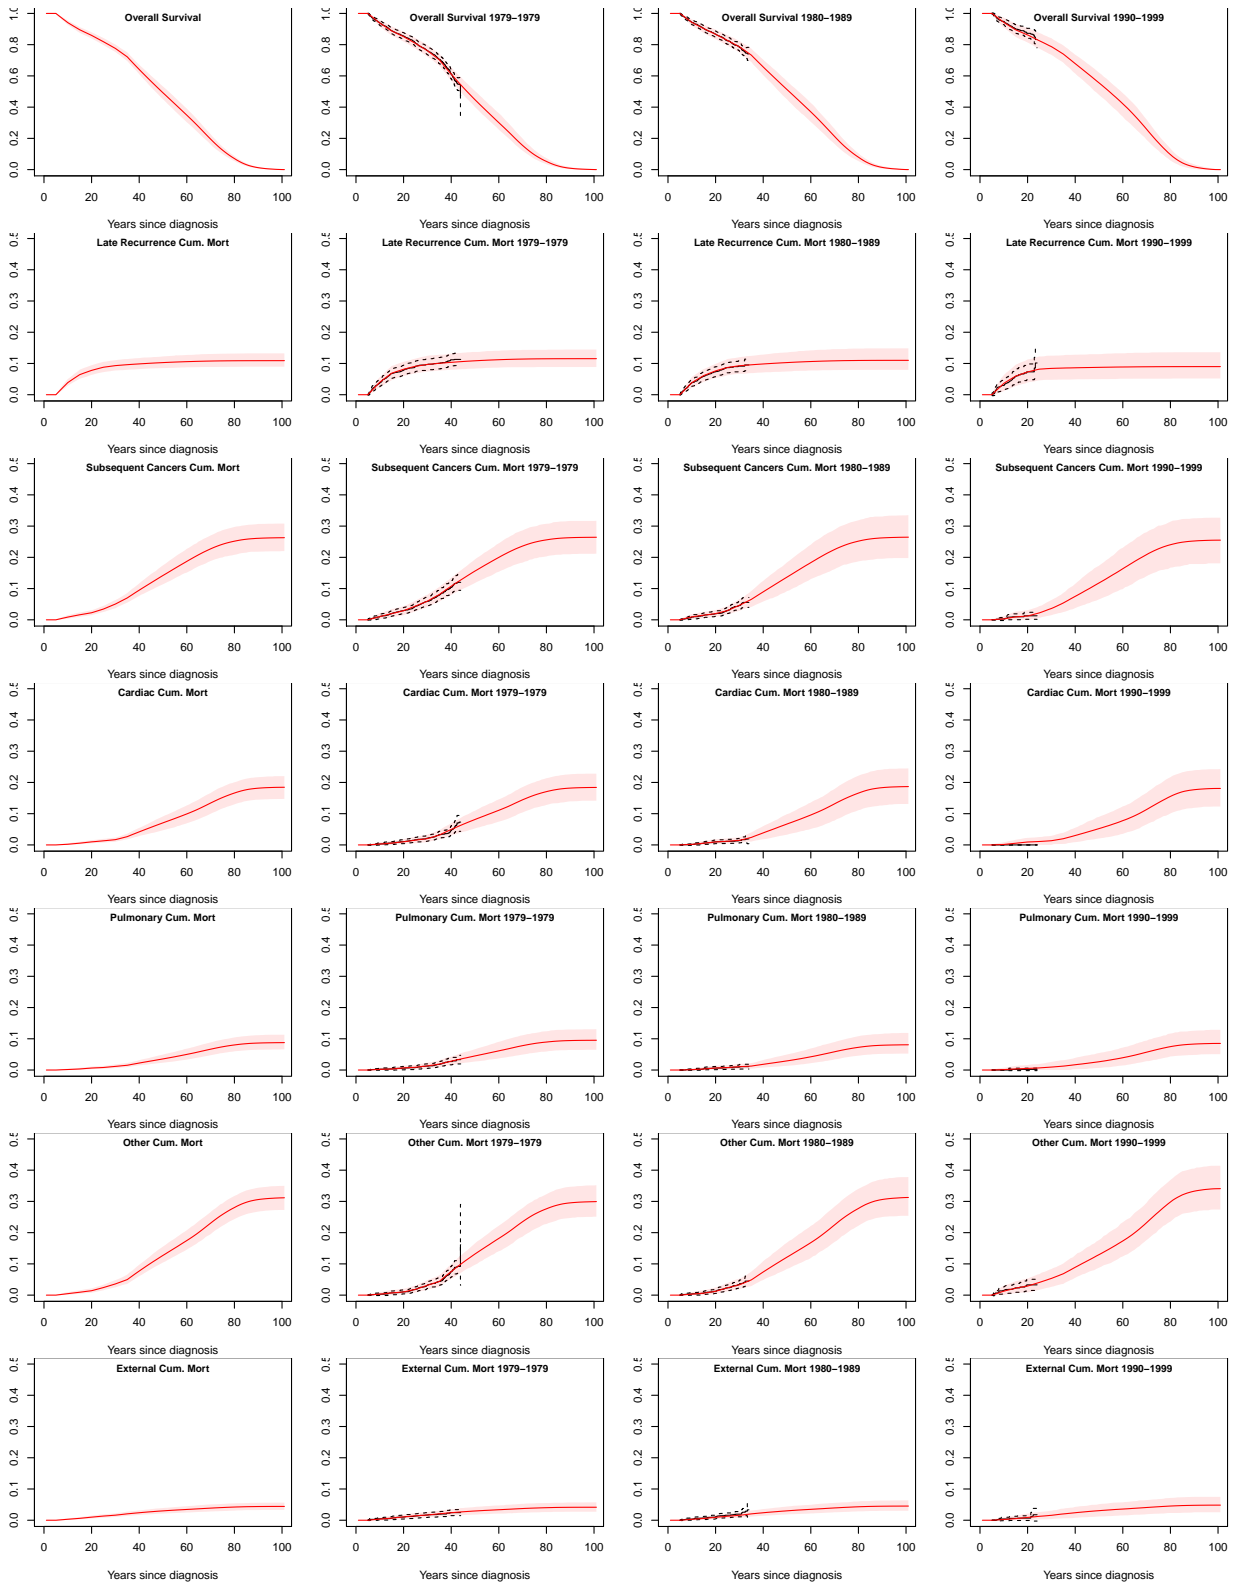

# Chemoradiotherapy

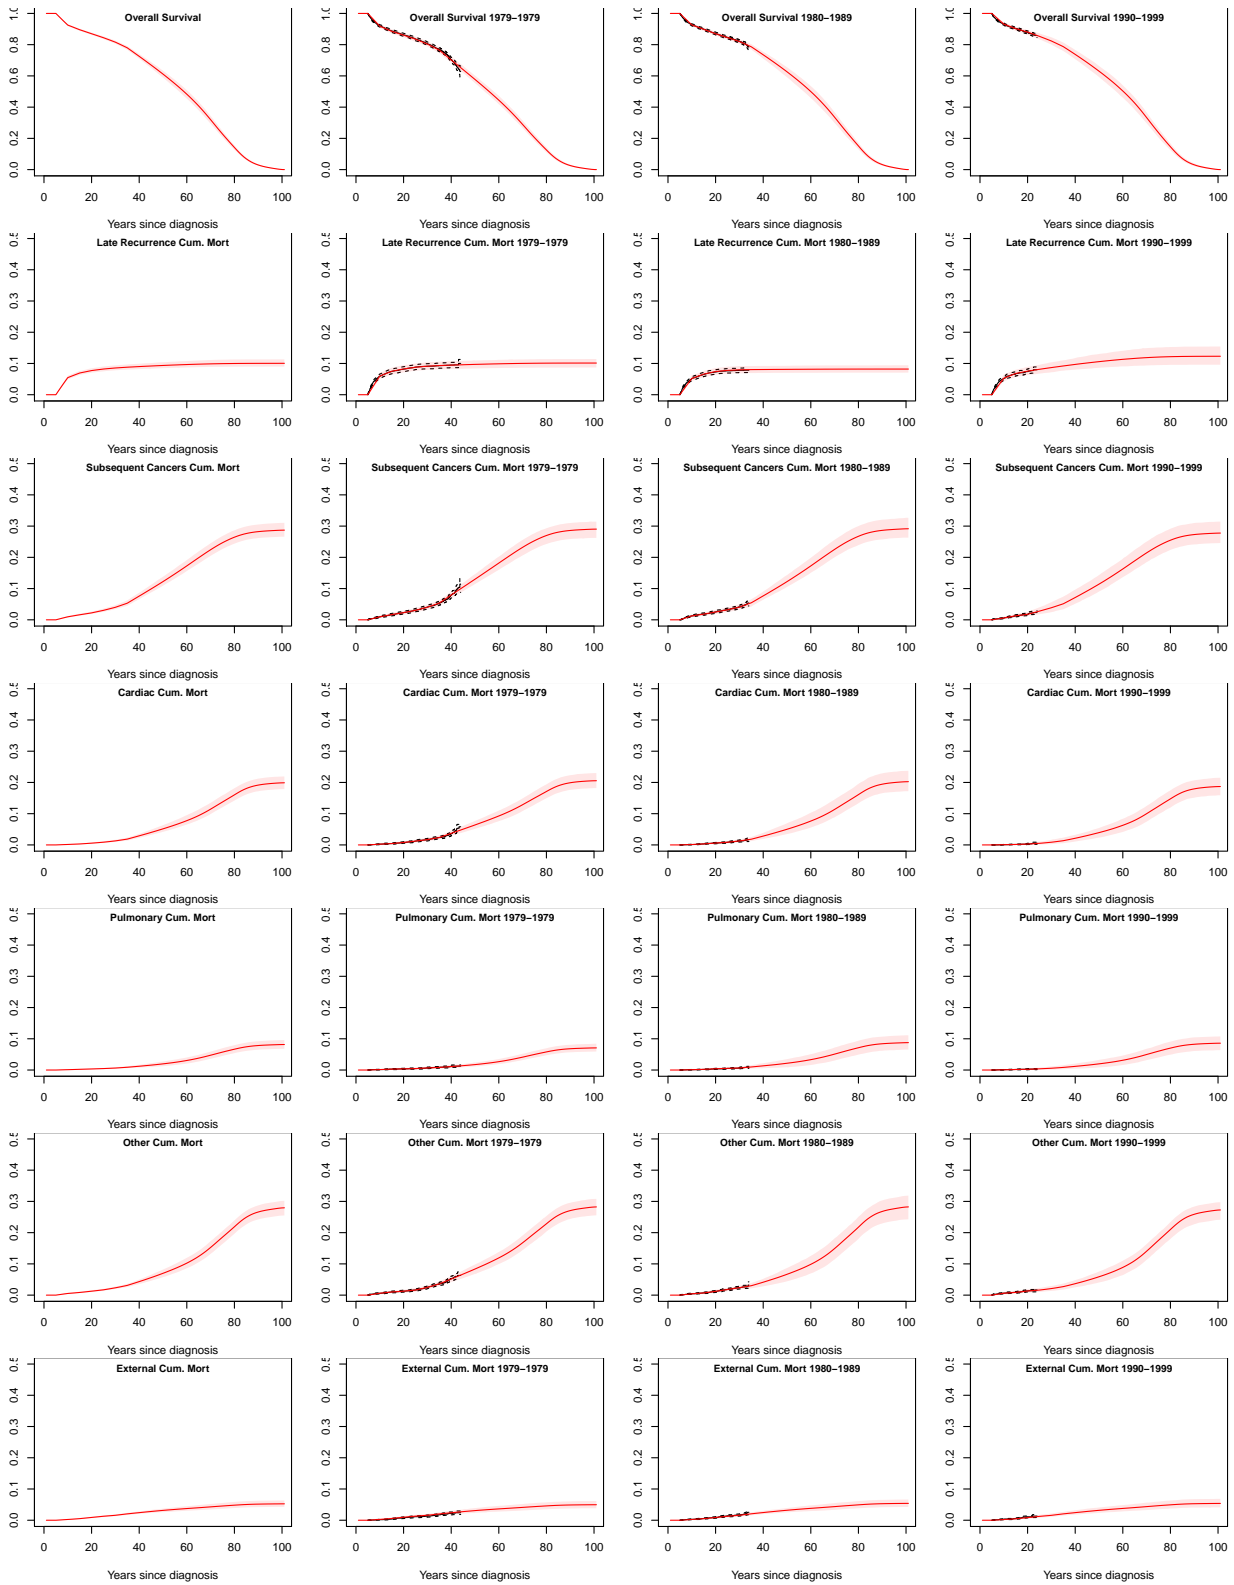

## Model Validation

To assess the validity of our model predictions, we compared predicted survival at 15-years after diagnosis with empirical data from the Surveillance, Epidemiology and End Results (SEER) program (Mertens et al. Cancer 2015;121(7):1108-17), and general population conditional life expectancy estimates from the US National Center for Health Statistics (NCHS) (Arias et al. Natl Vital Stat Rep 2017;66(4):1-64). At 15 years after diagnosis, modeled overall survival for survivors diagnosed with cancer between 1970 and 1989 approximated estimates for SEER patients diagnosed between 1975 and 1986 (90.2% vs. 89.4%, respectively). Modeled cause-specific mortality estimates fell within the 95% CI of cause of death estimates available in SEER, as shown in Supplemental Figure 2. Additionally, projected conditional life expectancy for individuals without a history of childhood cancer (65.9 years at 12.3 years of age (mean age of overall cohort) for a life expectancy of 73.2 years) was similar to US National Center for Health Statistics estimates for individuals born in 1979-81 (65.1 years at 10 years of age for a life expectancy of 75.1 years).

### Comparison of model results with published SEER estimates

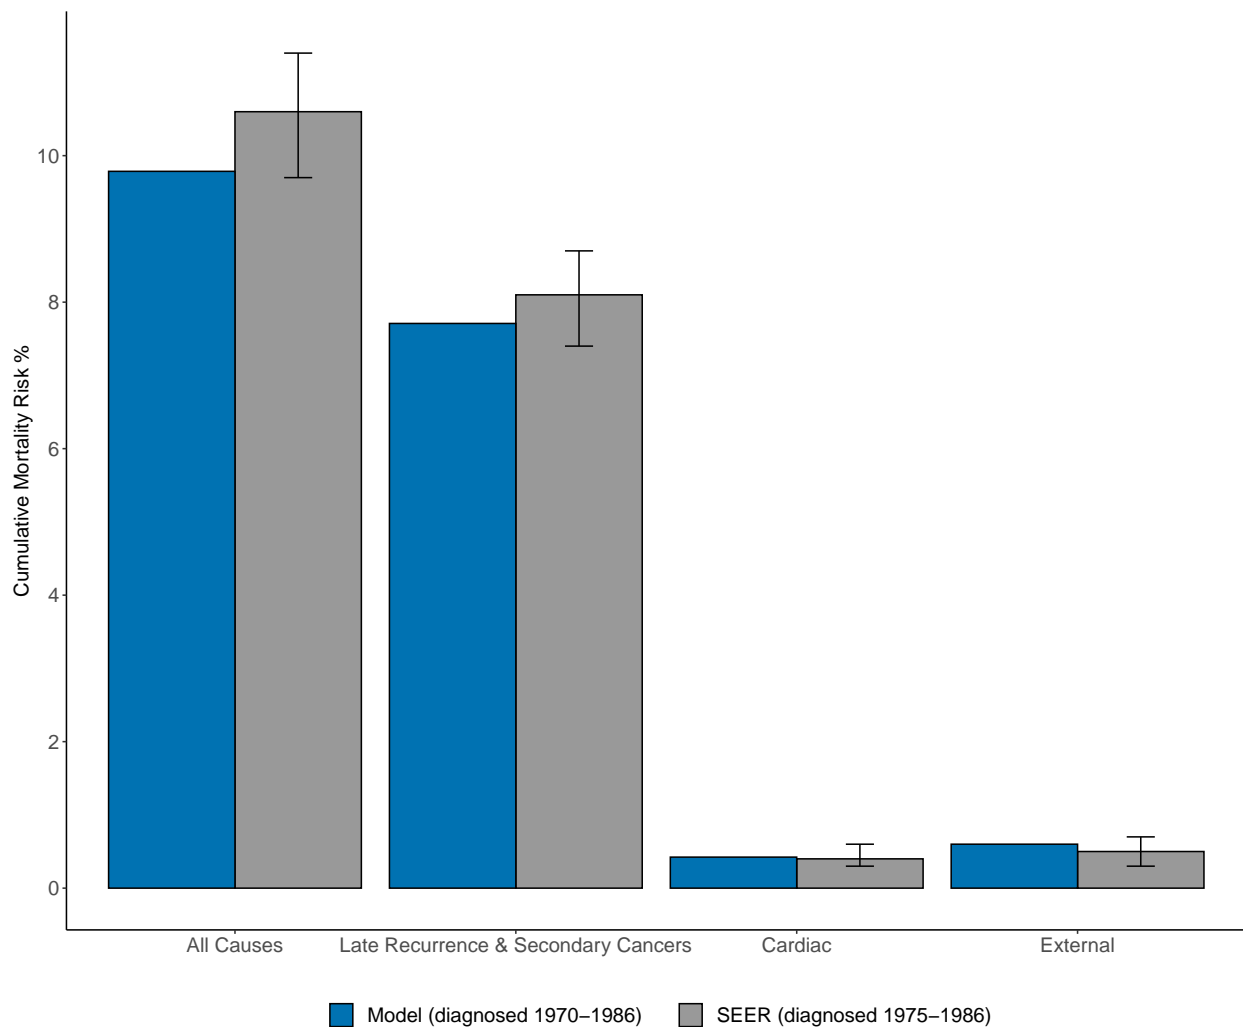



## Model Outcomes

We ran 1,000 iterations of the model to account for first-order (stochastic) and second-order (parameter) uncertainty. To account for first-order uncertainty we bootstrapped the CCSS cohort using the original cohort size with a random bootstrap in each iteration. To account for second-order uncertainty we sampled a parameter set (from the top 50) uniformly at random. We compared each respondent to a synthetic ‘twin’ created at the individual-level by removing survivor-related late recurrence mortality and AERs. Shaded areas indicate 95% UI.

## Life Expectancy

### Total

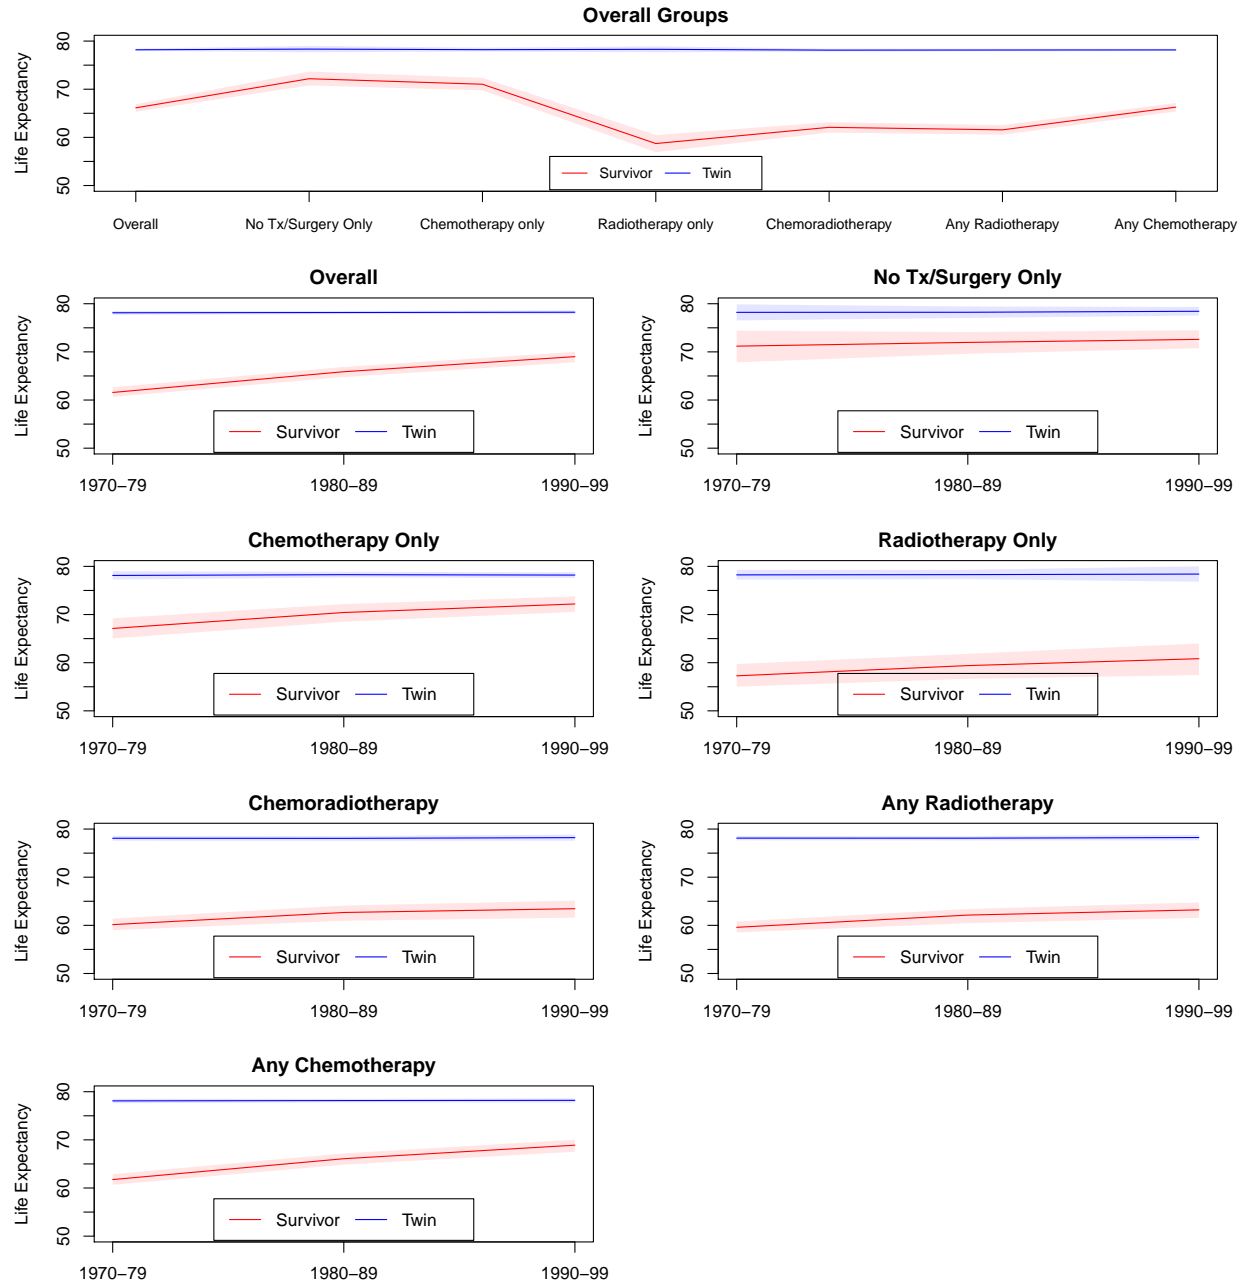

# Conditional

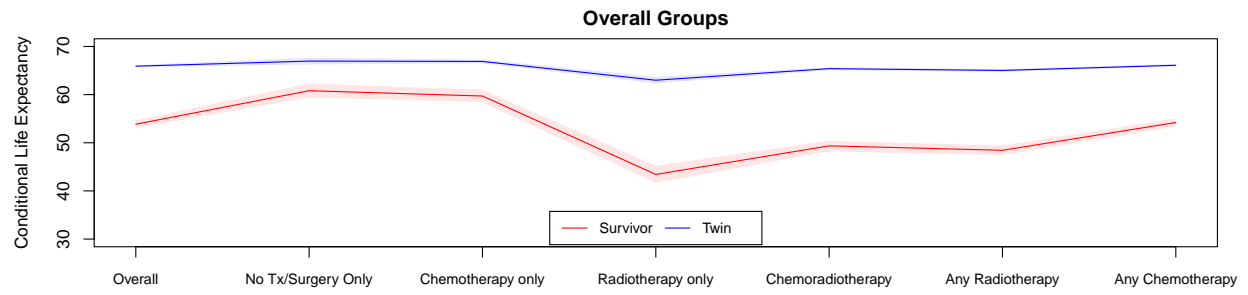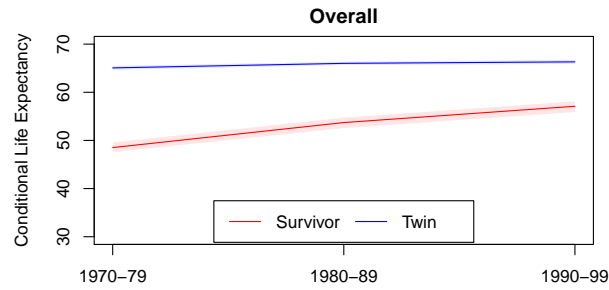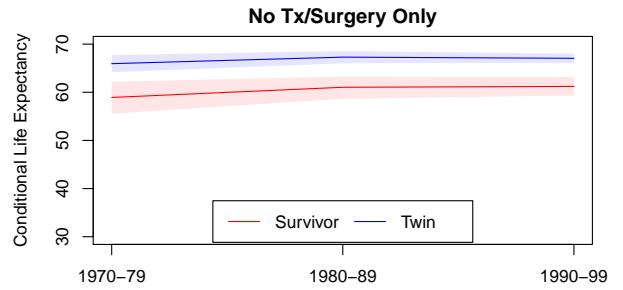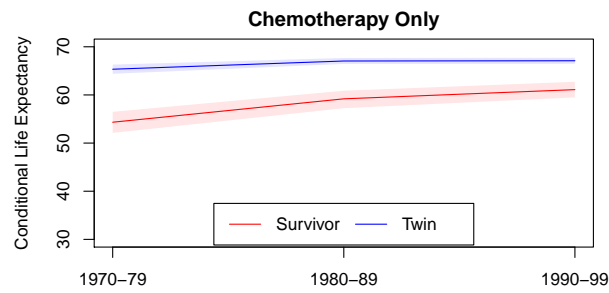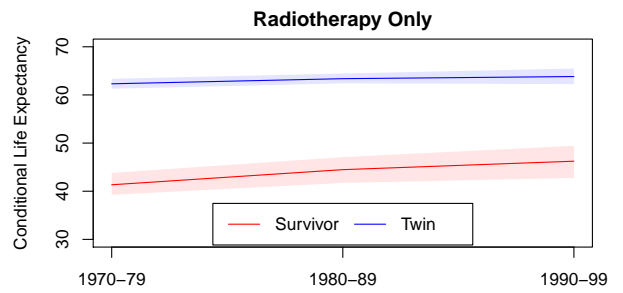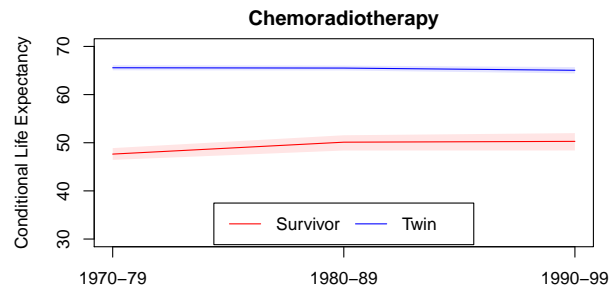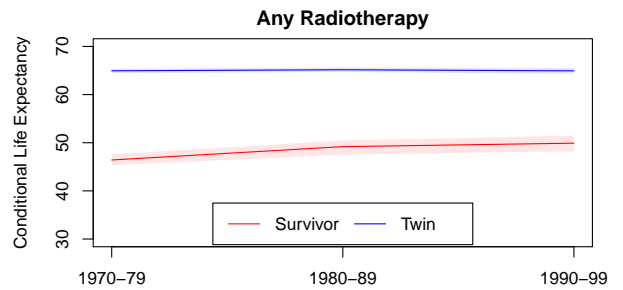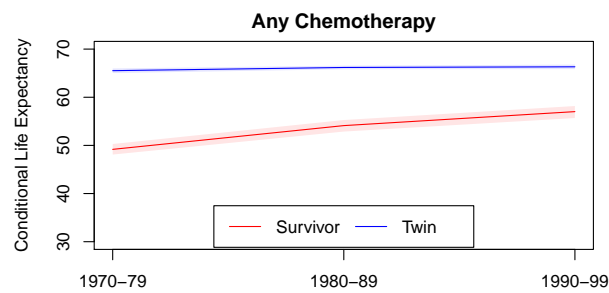

# Loss of Conditional LE

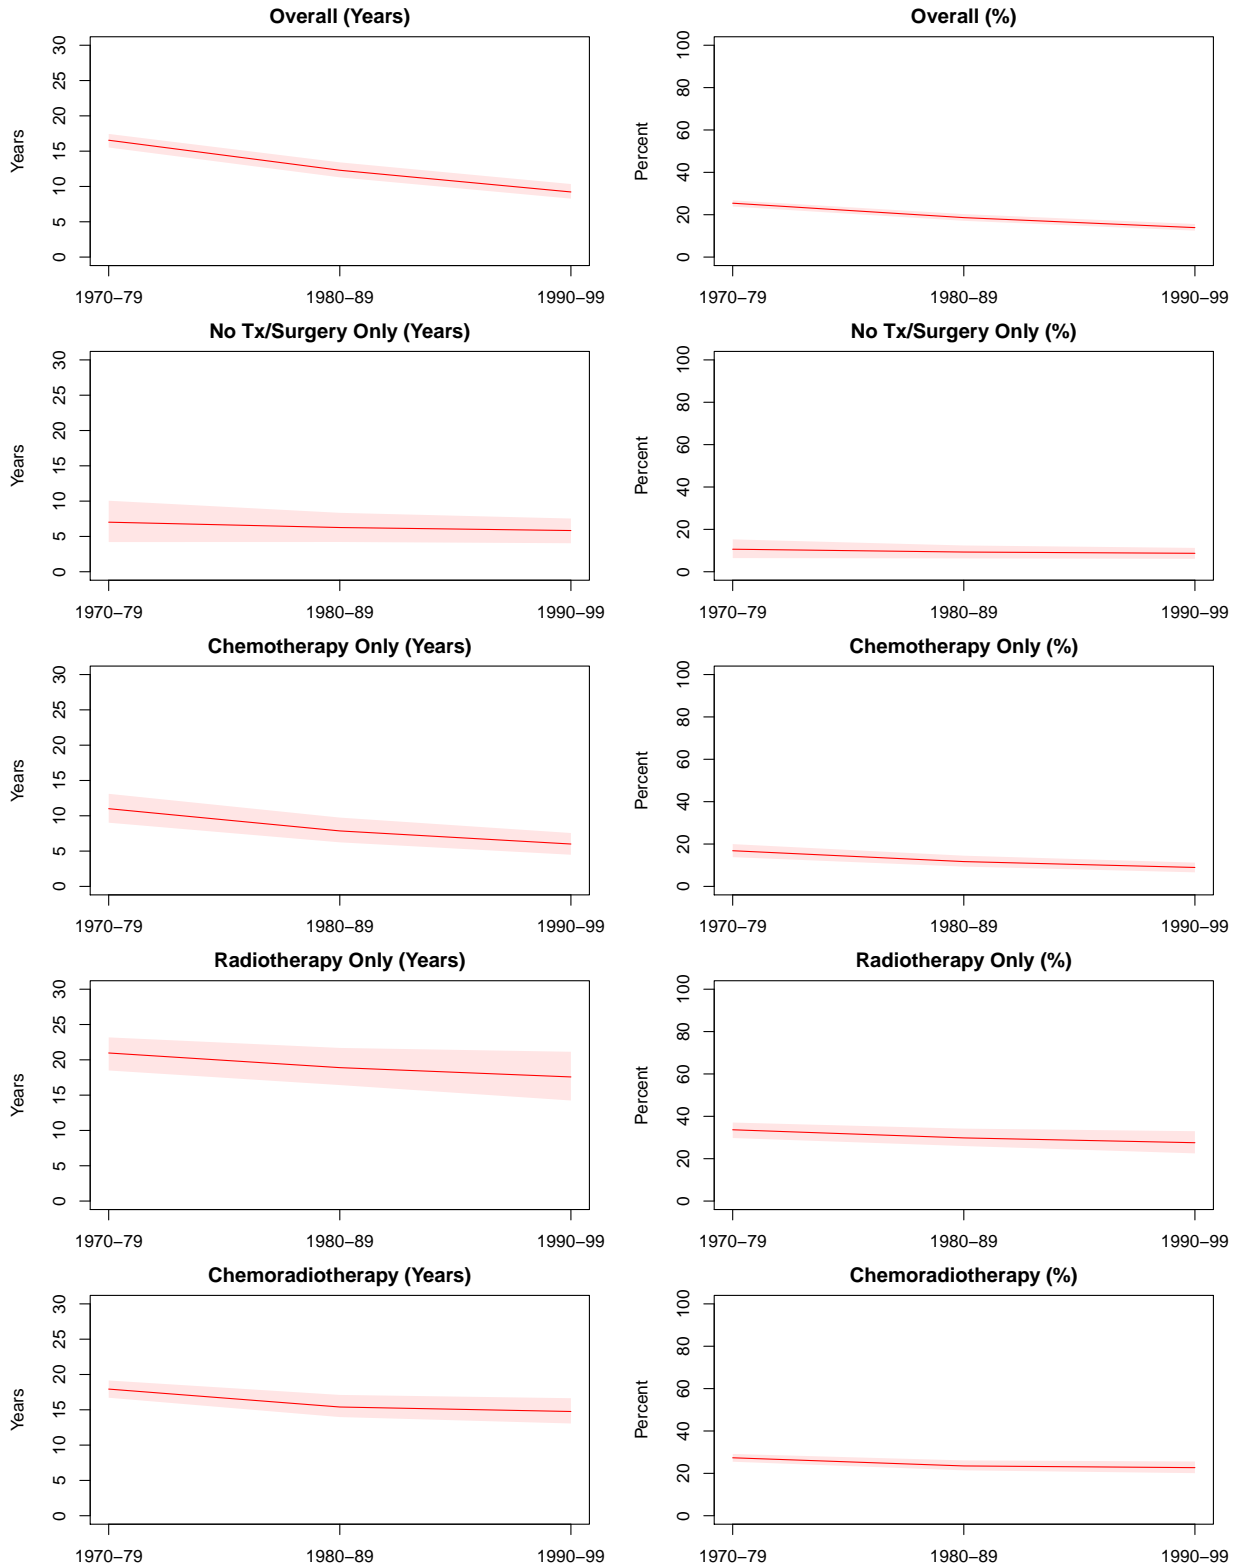

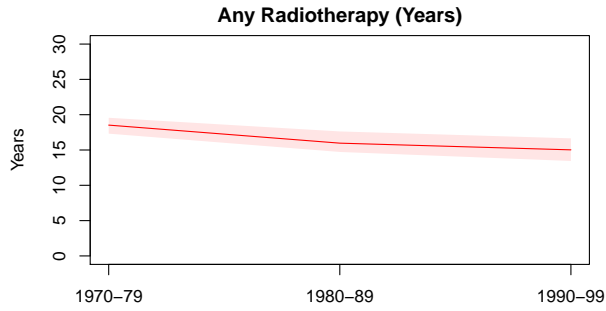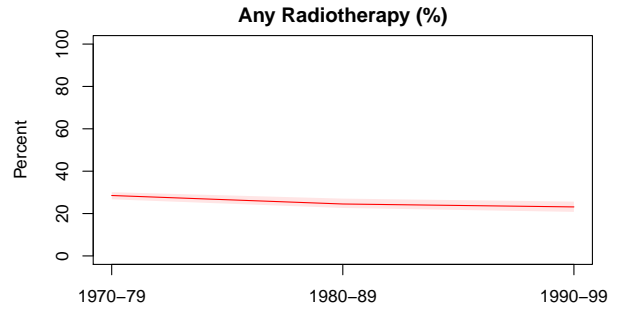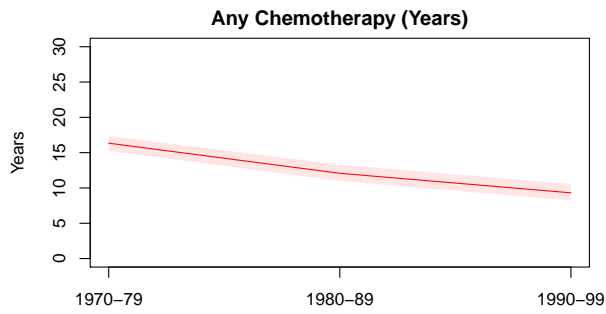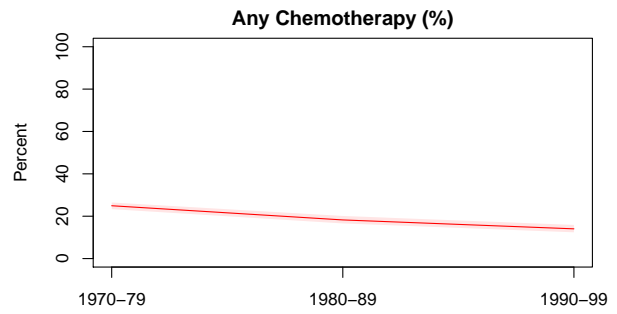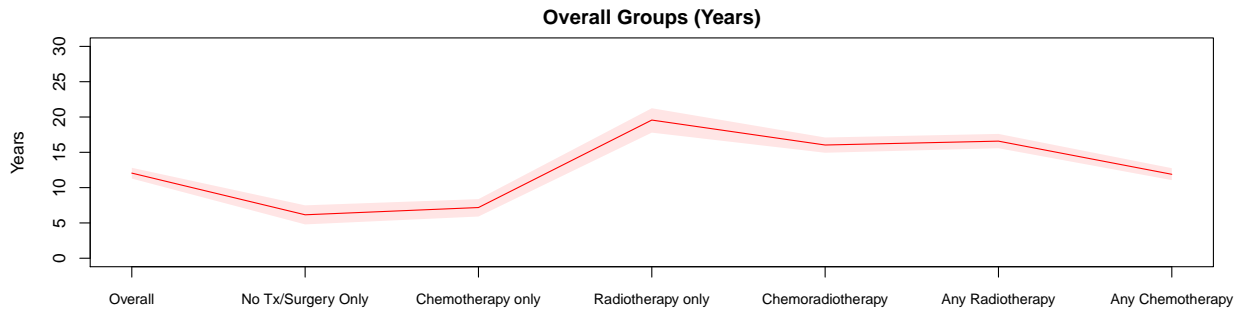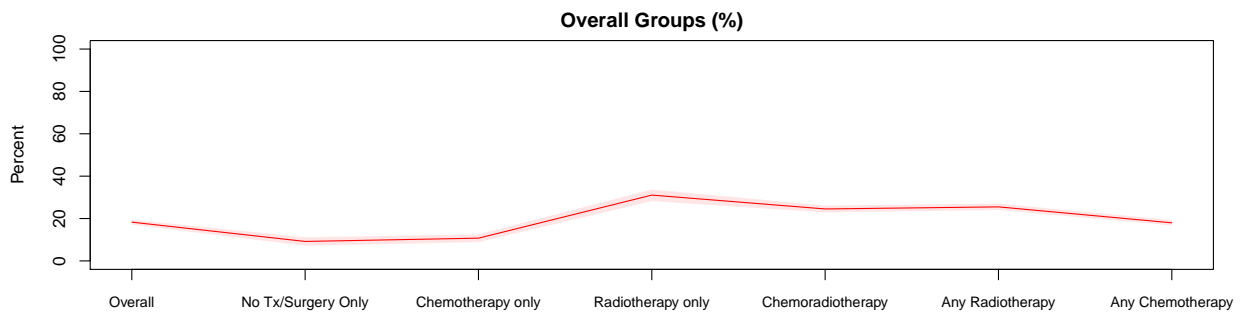

# Ten-Year Mortality Risk

## Overall

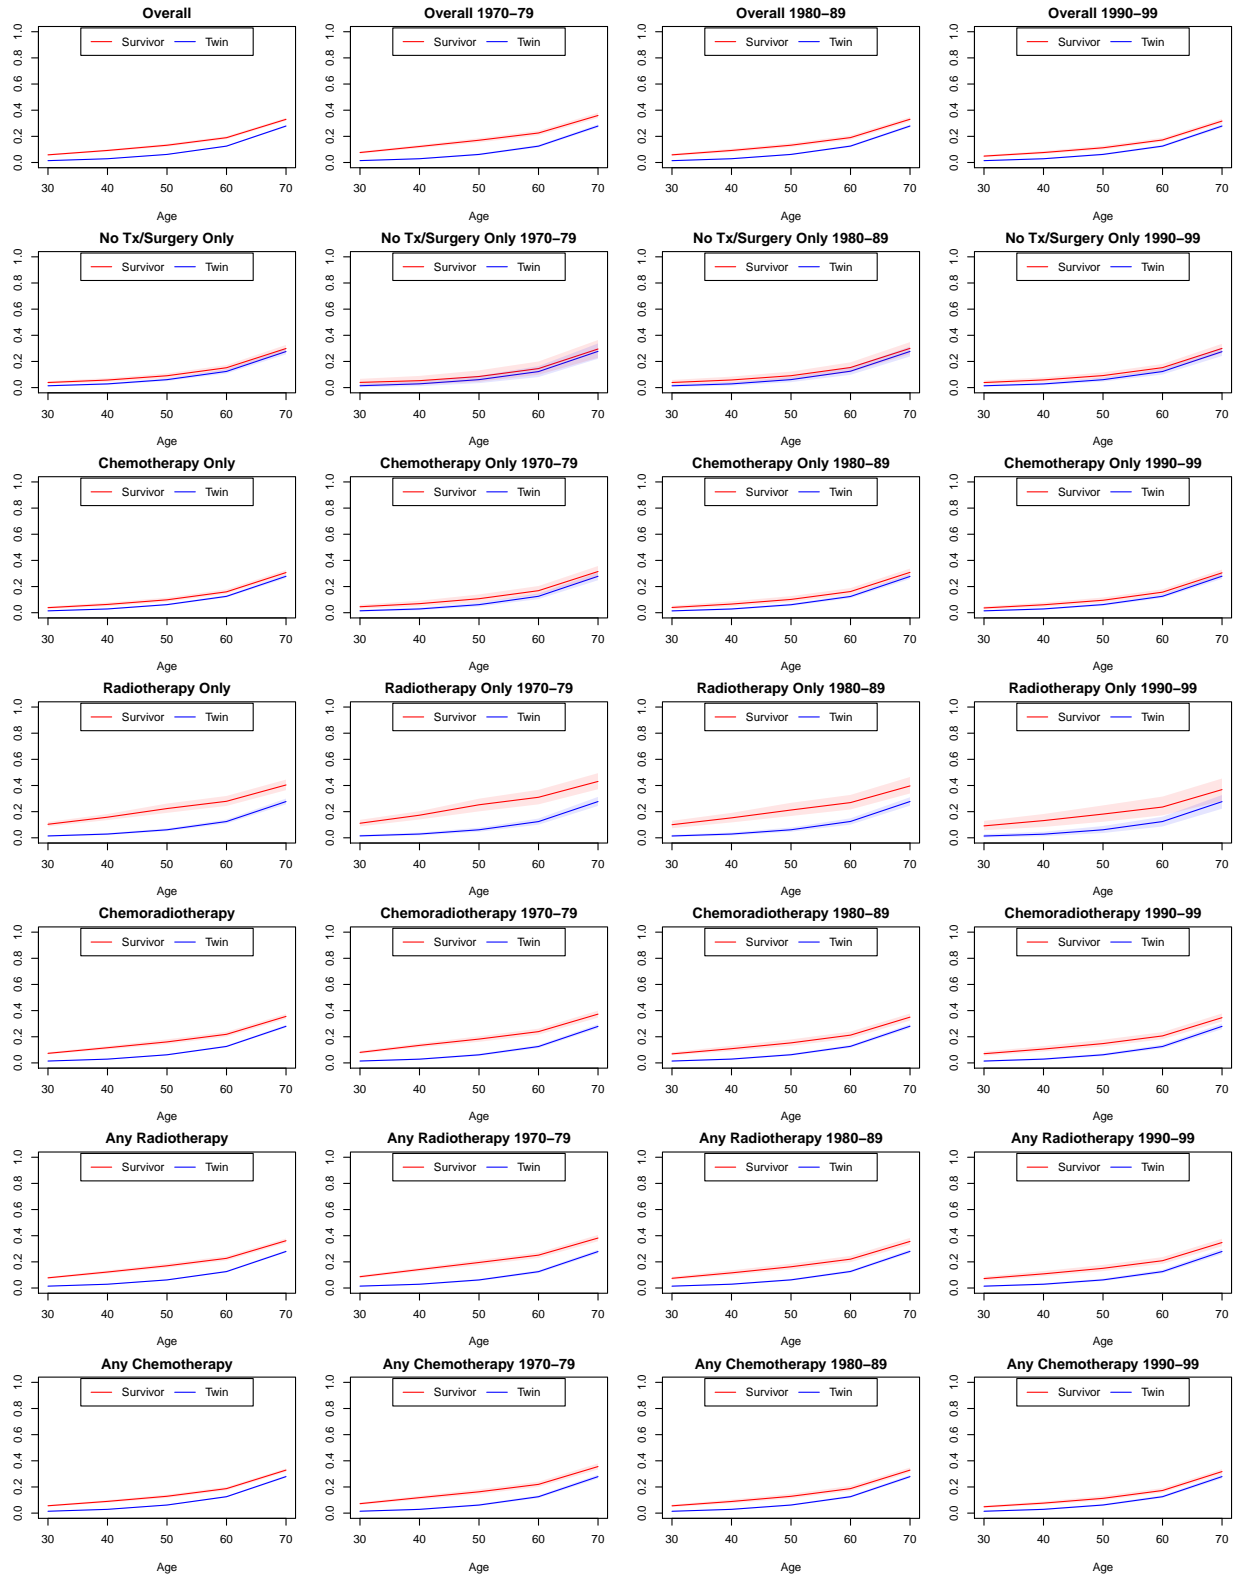

# Late Recurrence

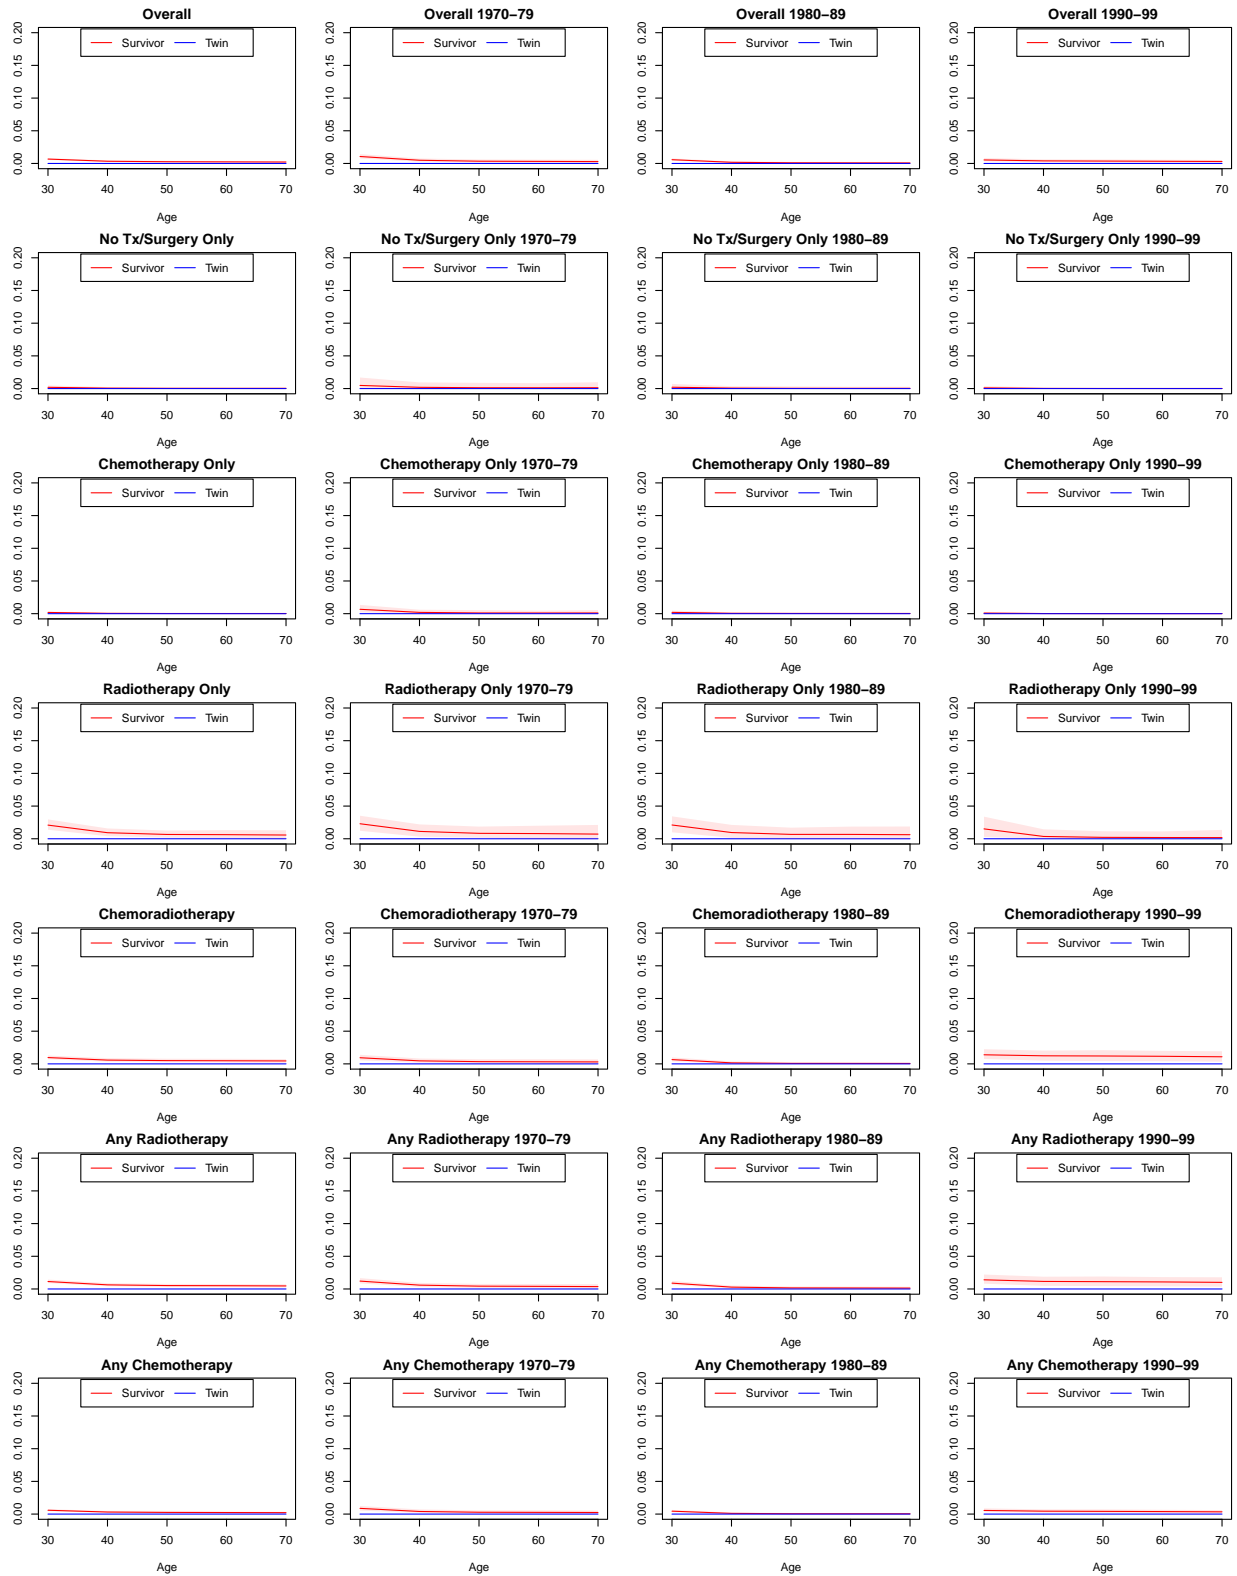

# Subsequent Cancers

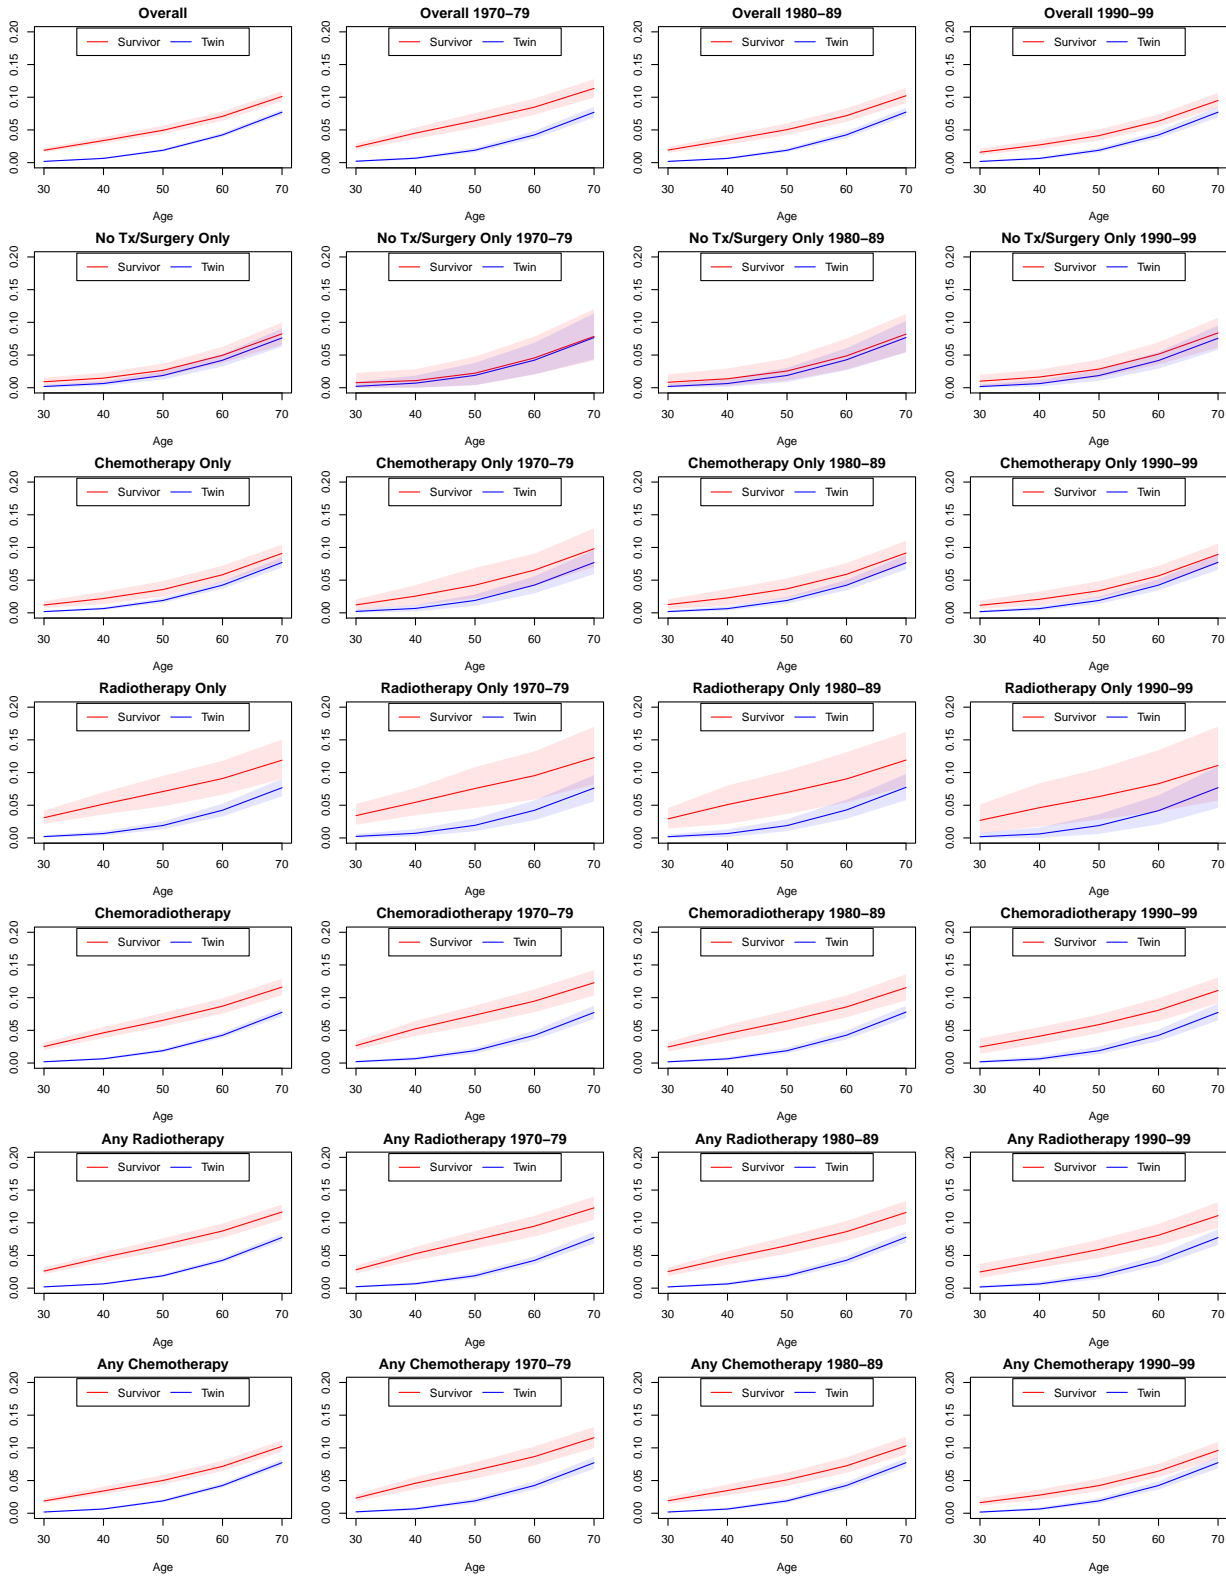

# Cardiac

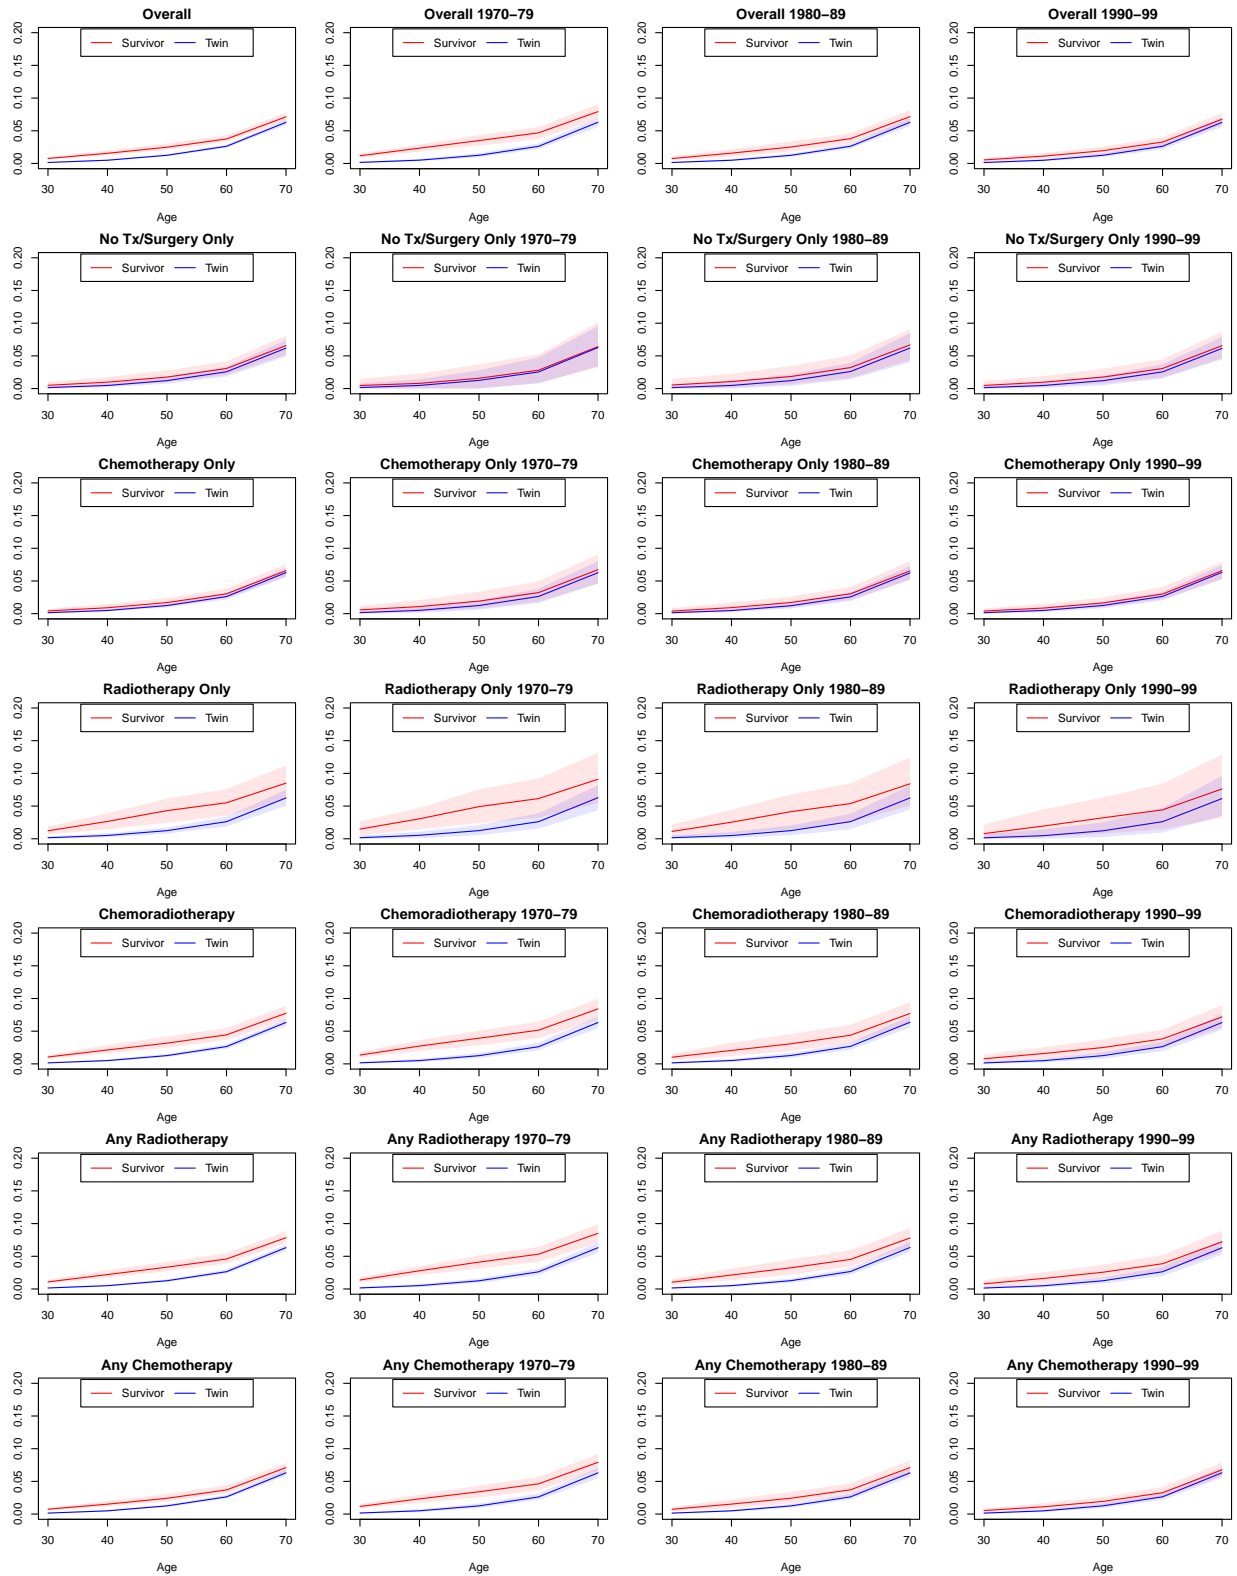



# Pulmonary

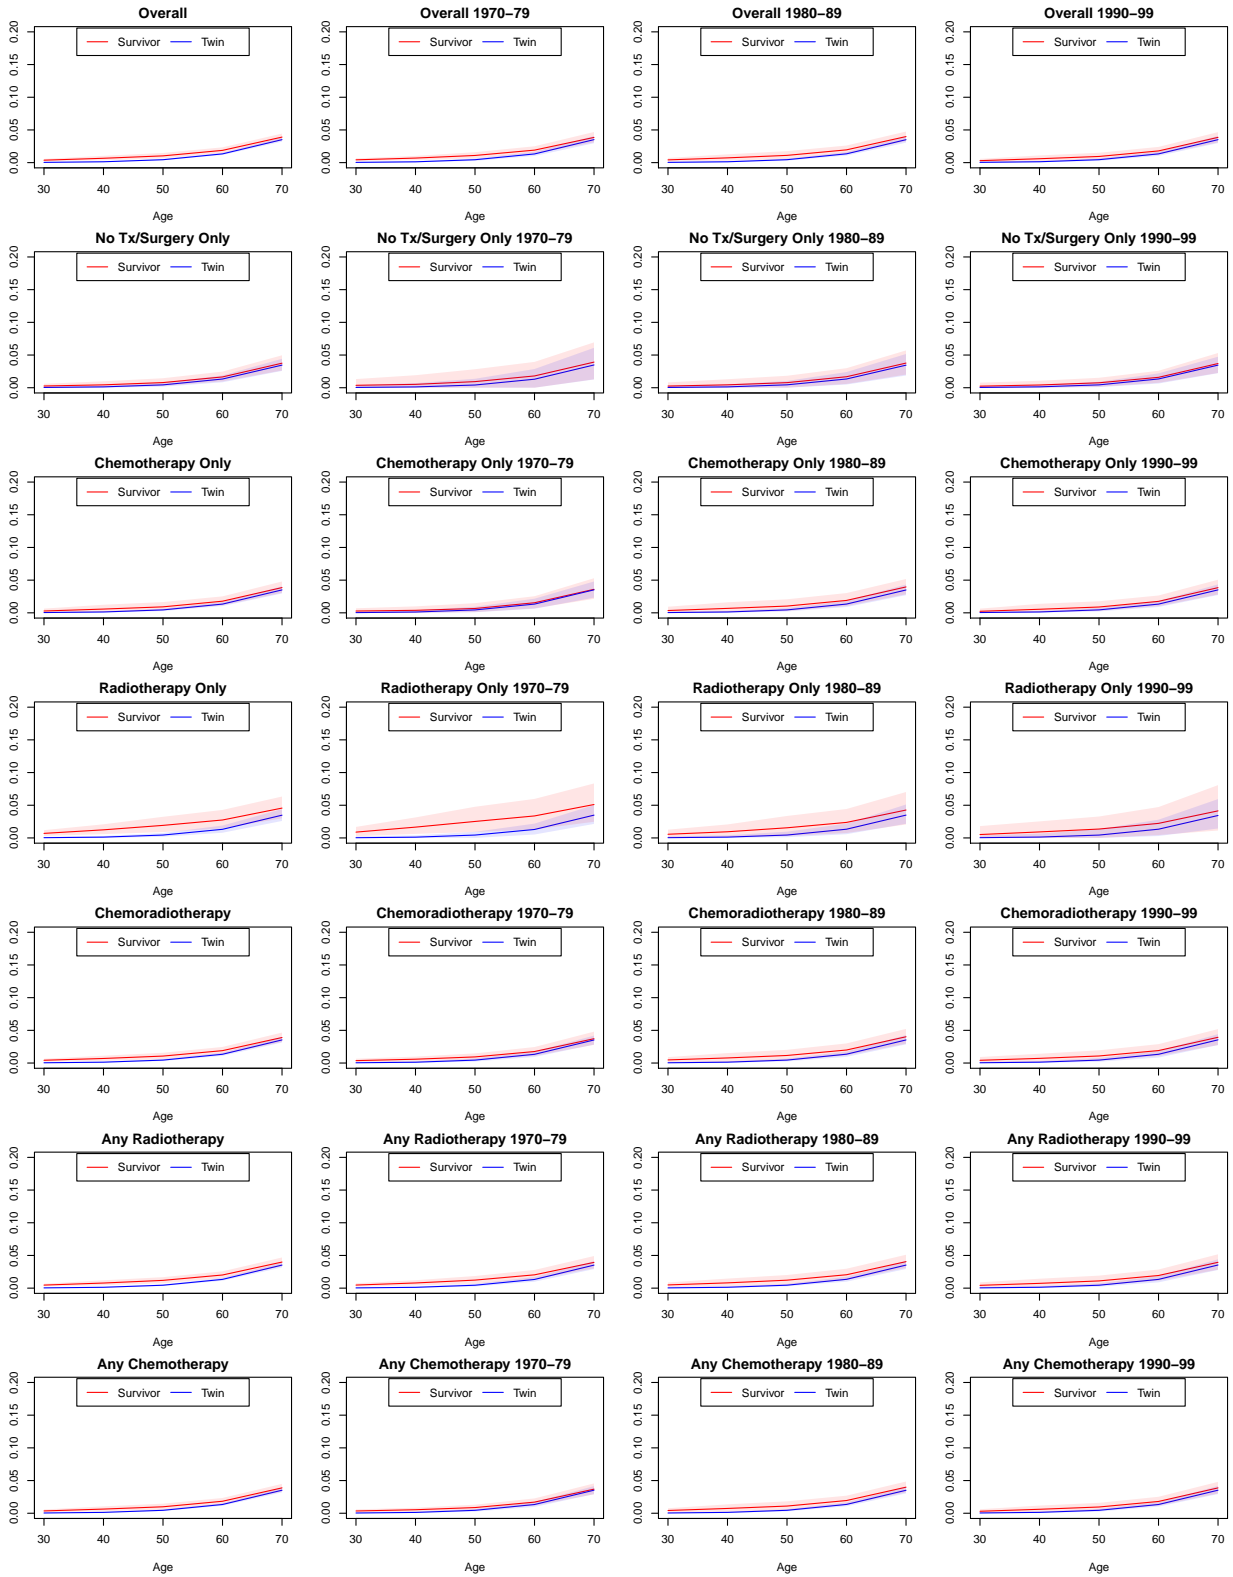

# Other

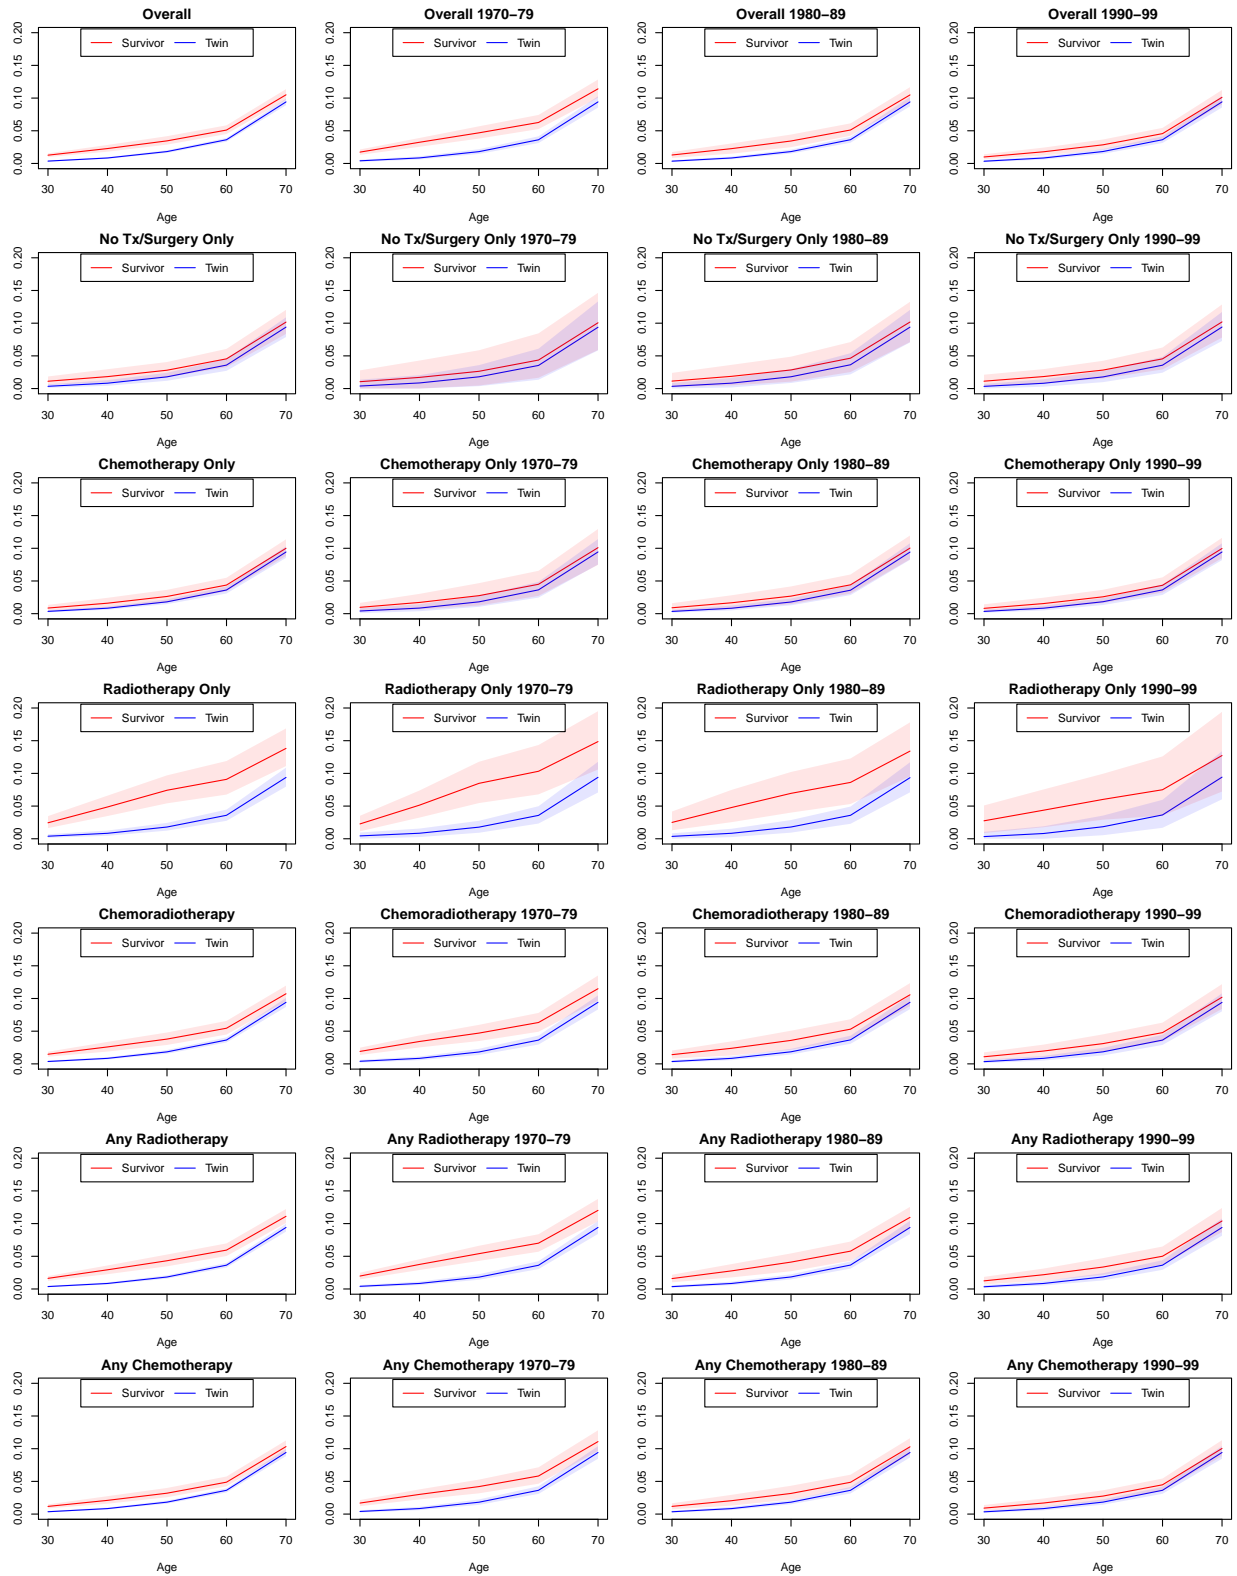

# External

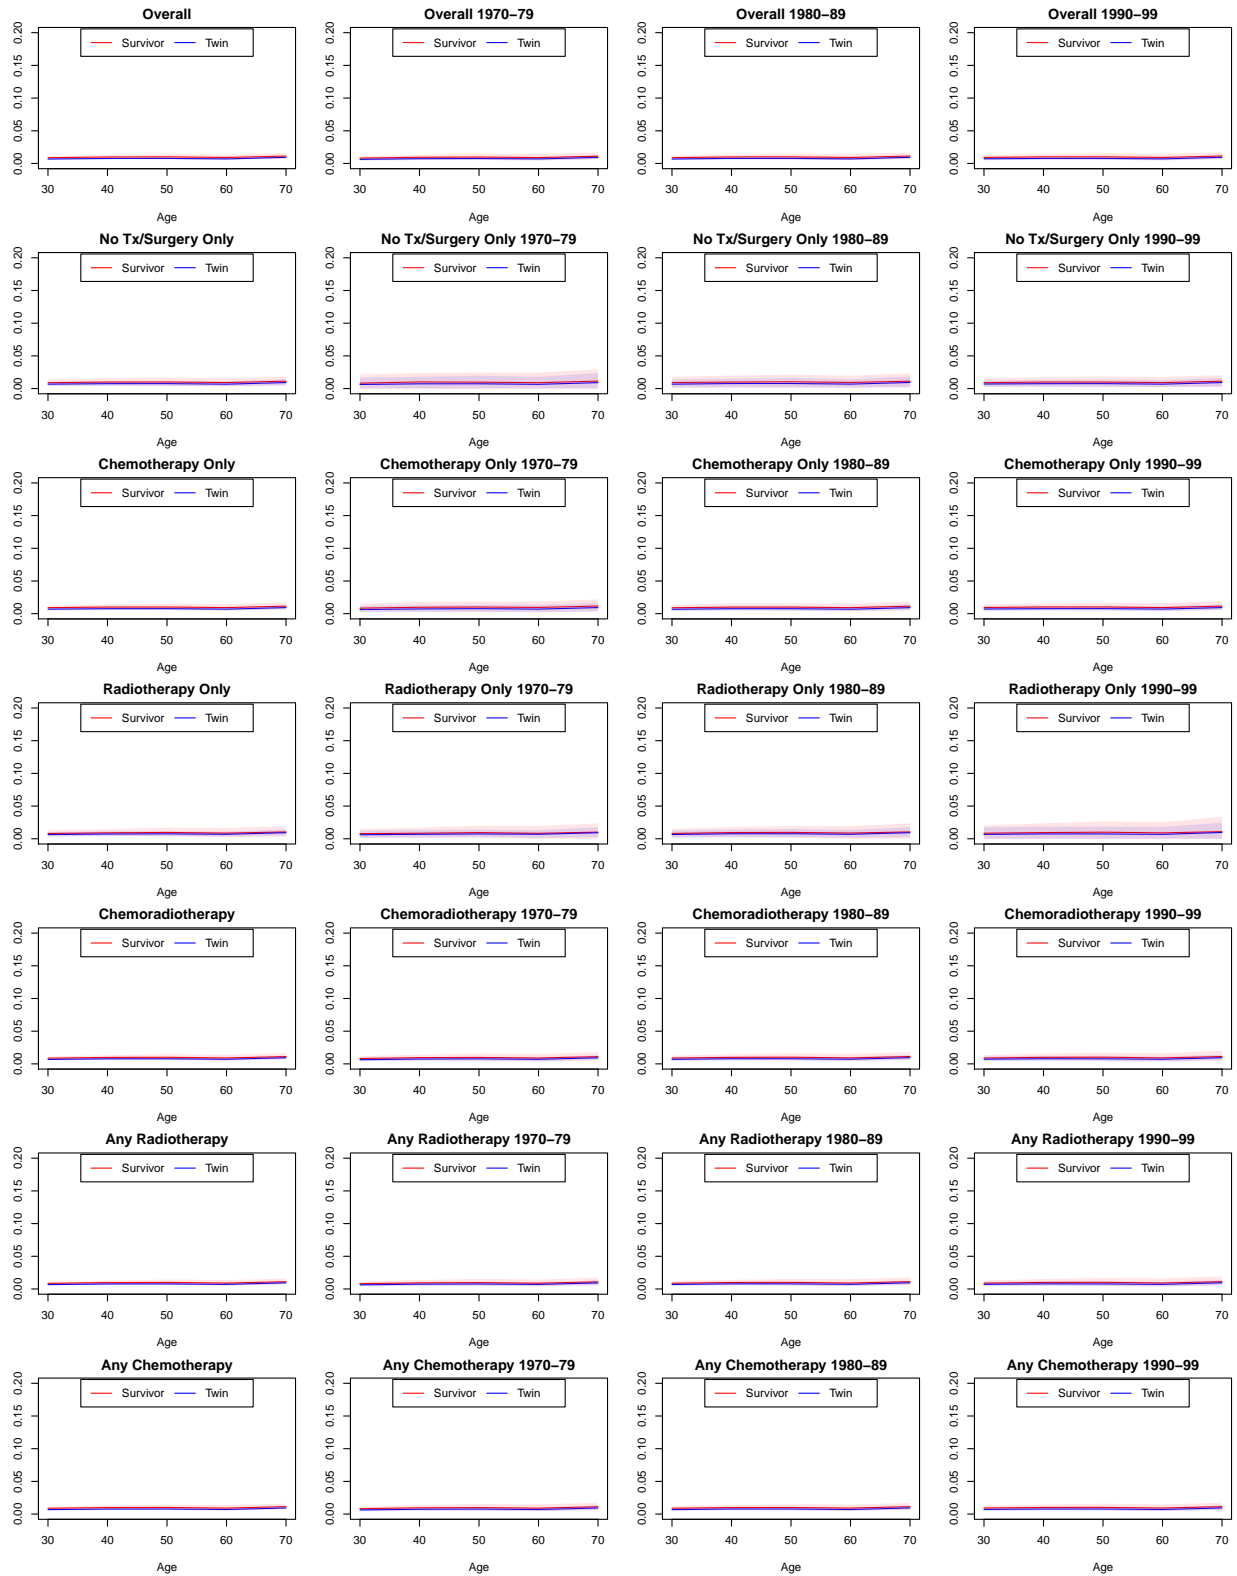

# Survival Curves/Cumulative Mortality by Age

## Overall

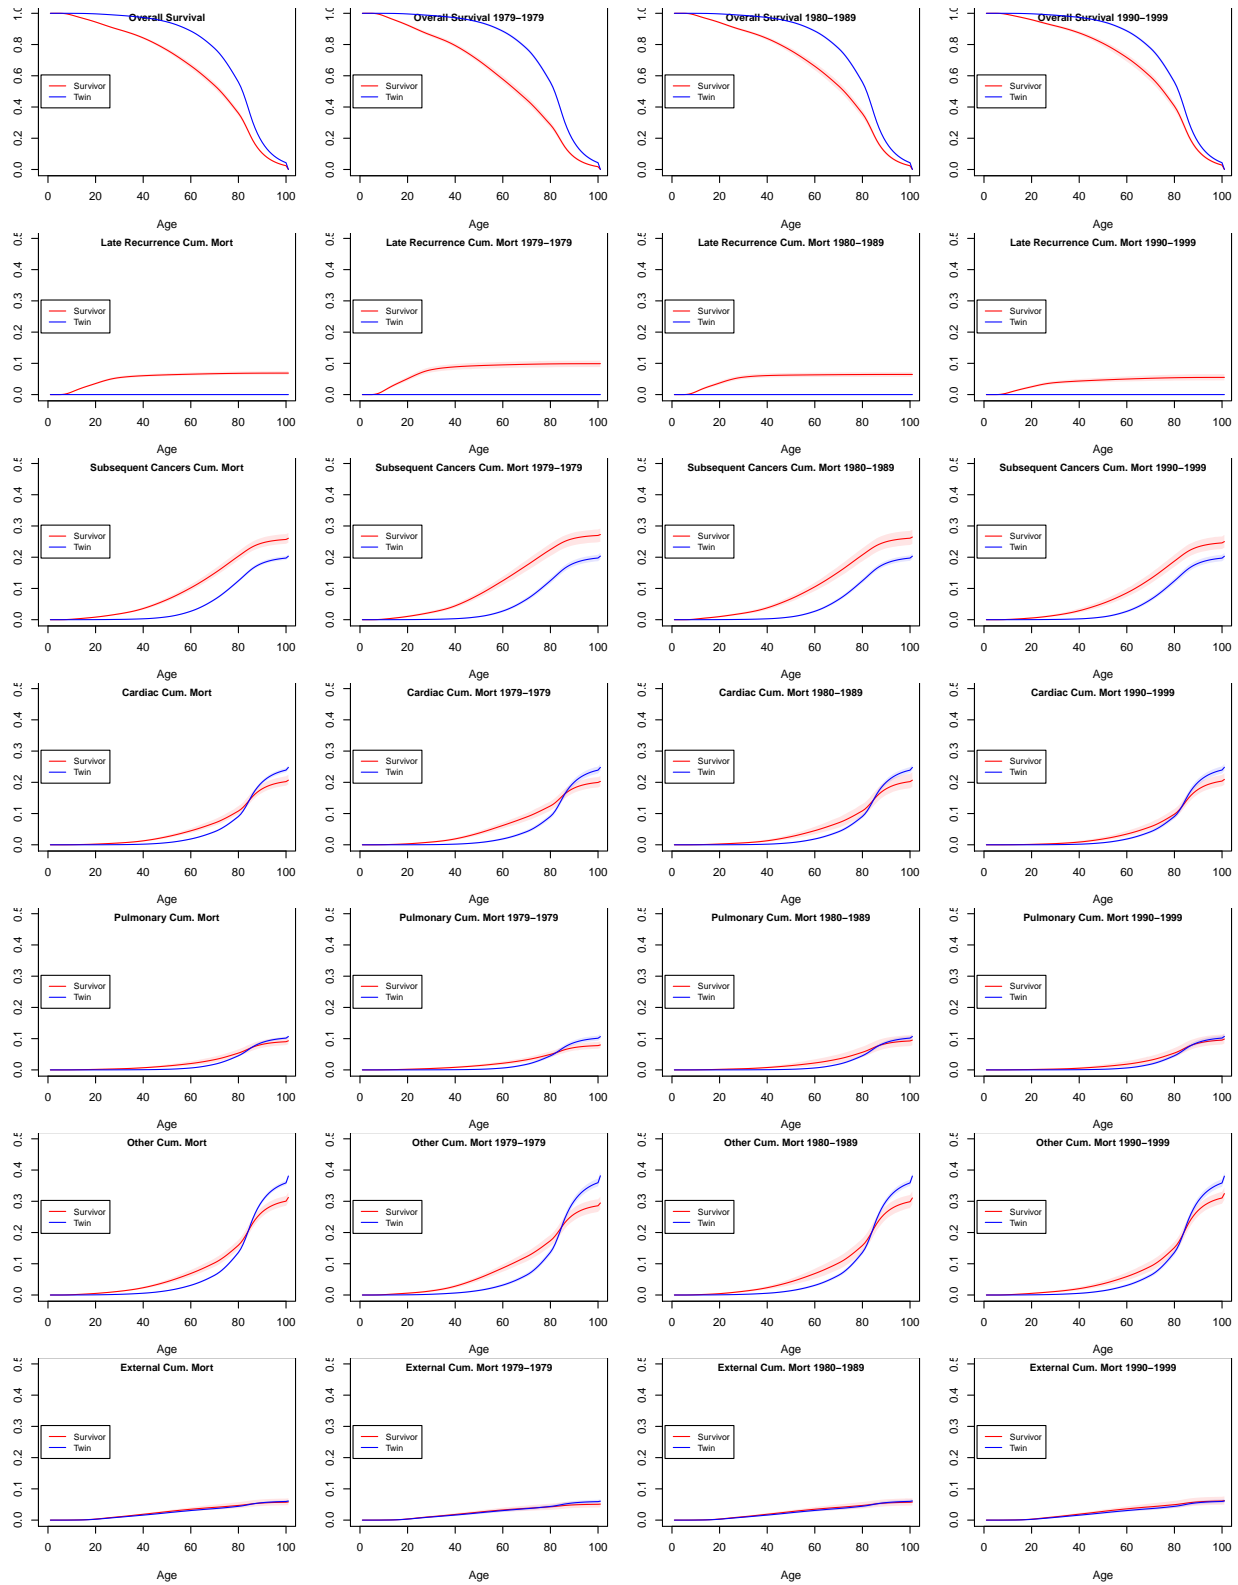

# No Treatment/Surgery Only

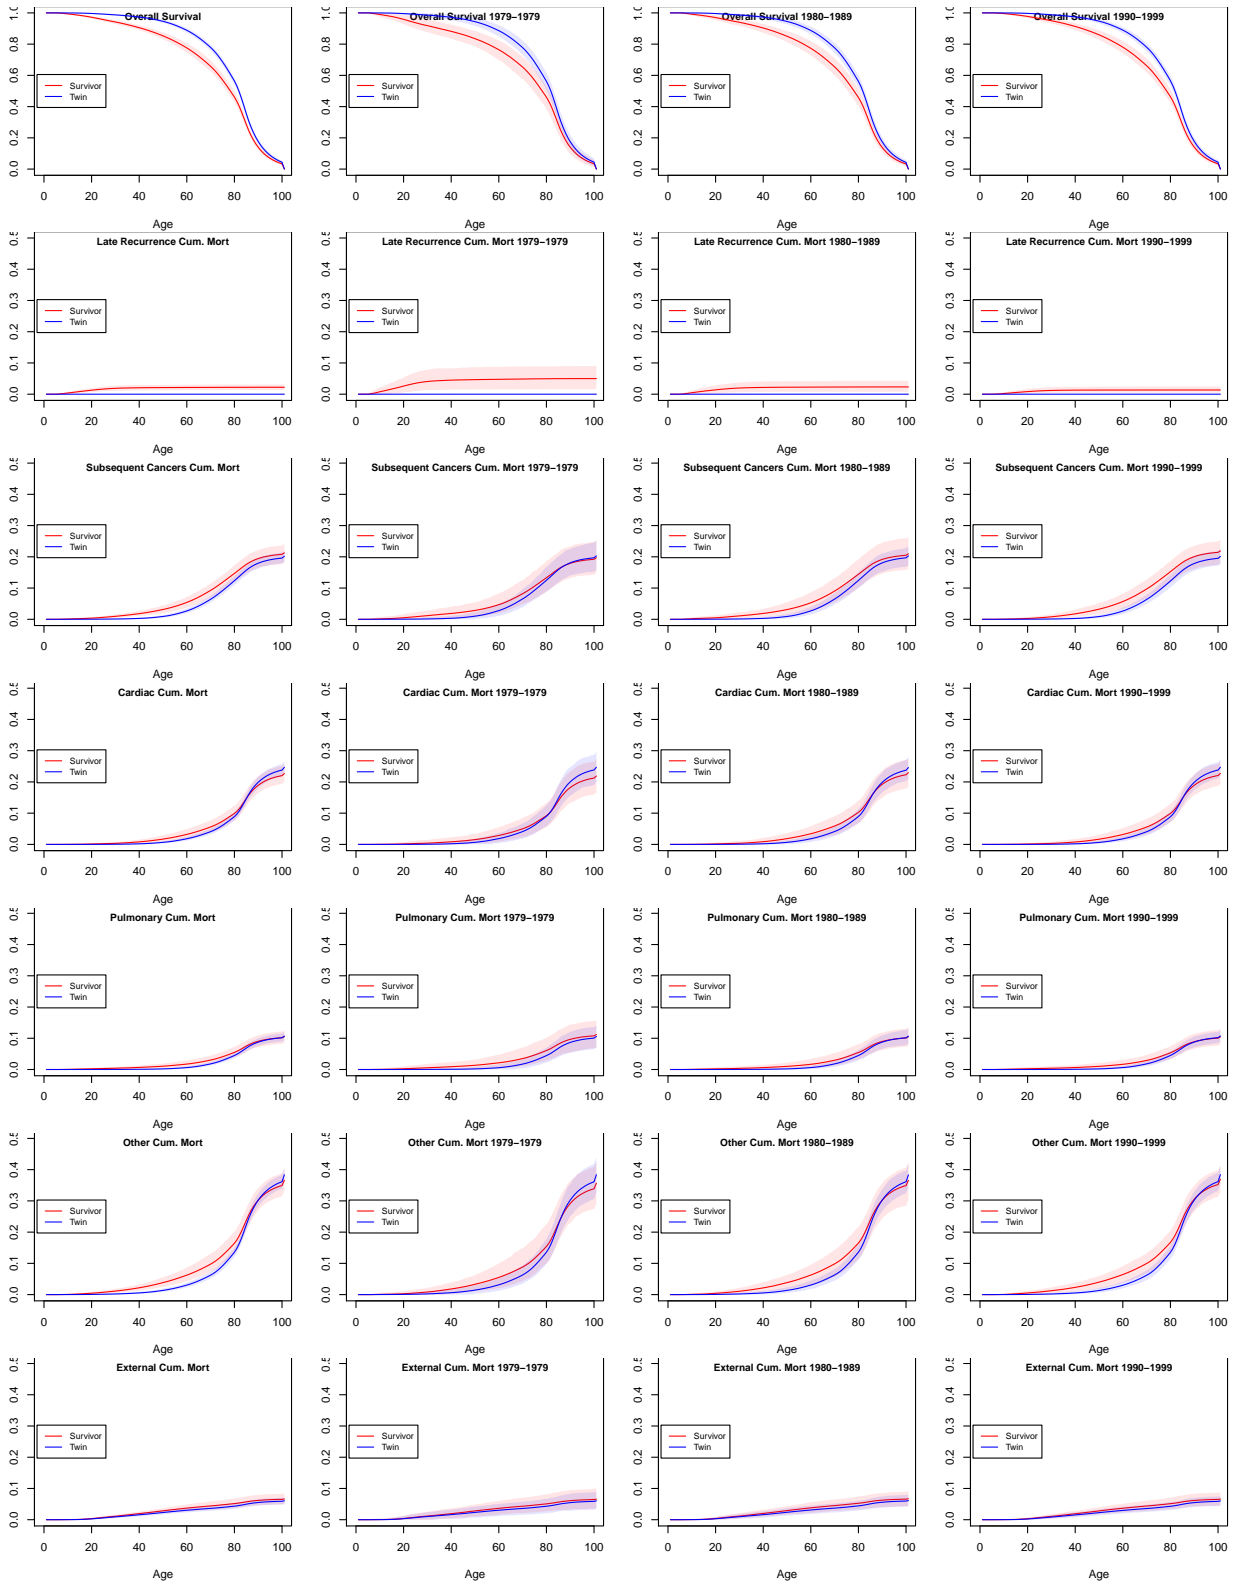

# Chemotherapy Only

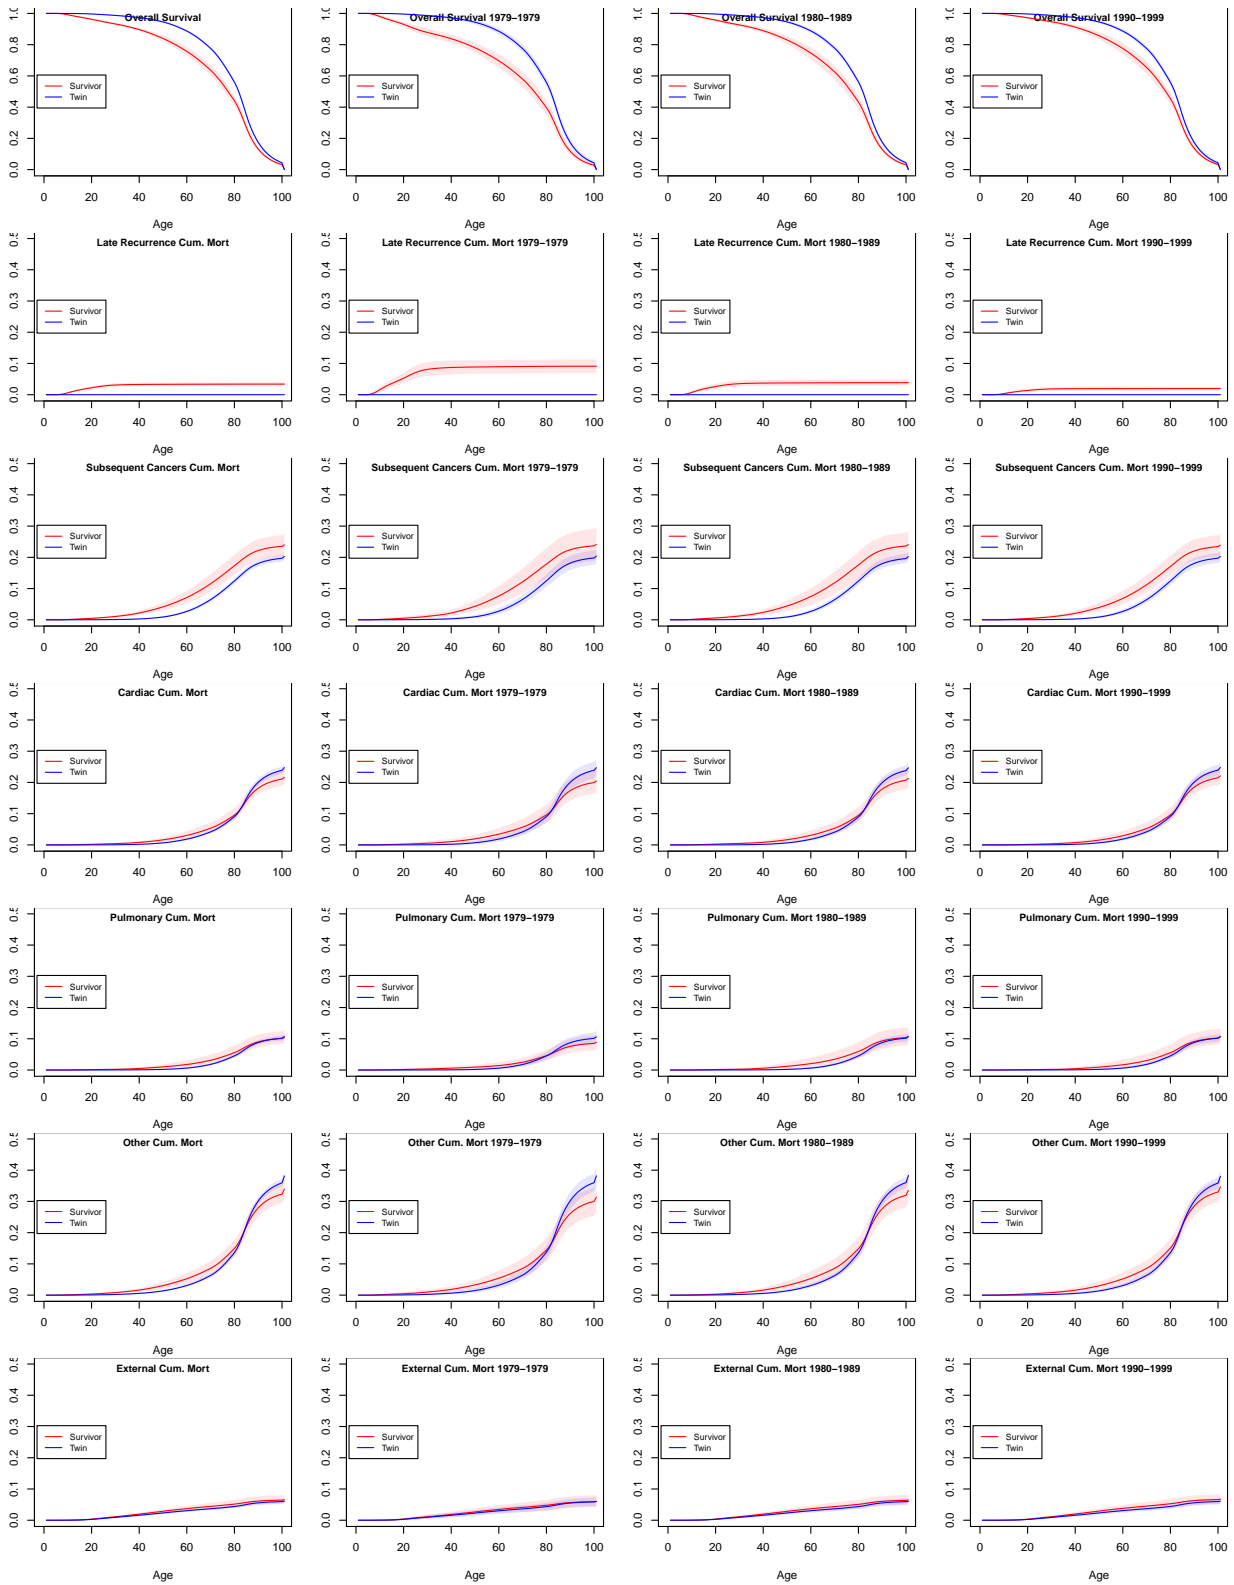

# Radiotherapy Only

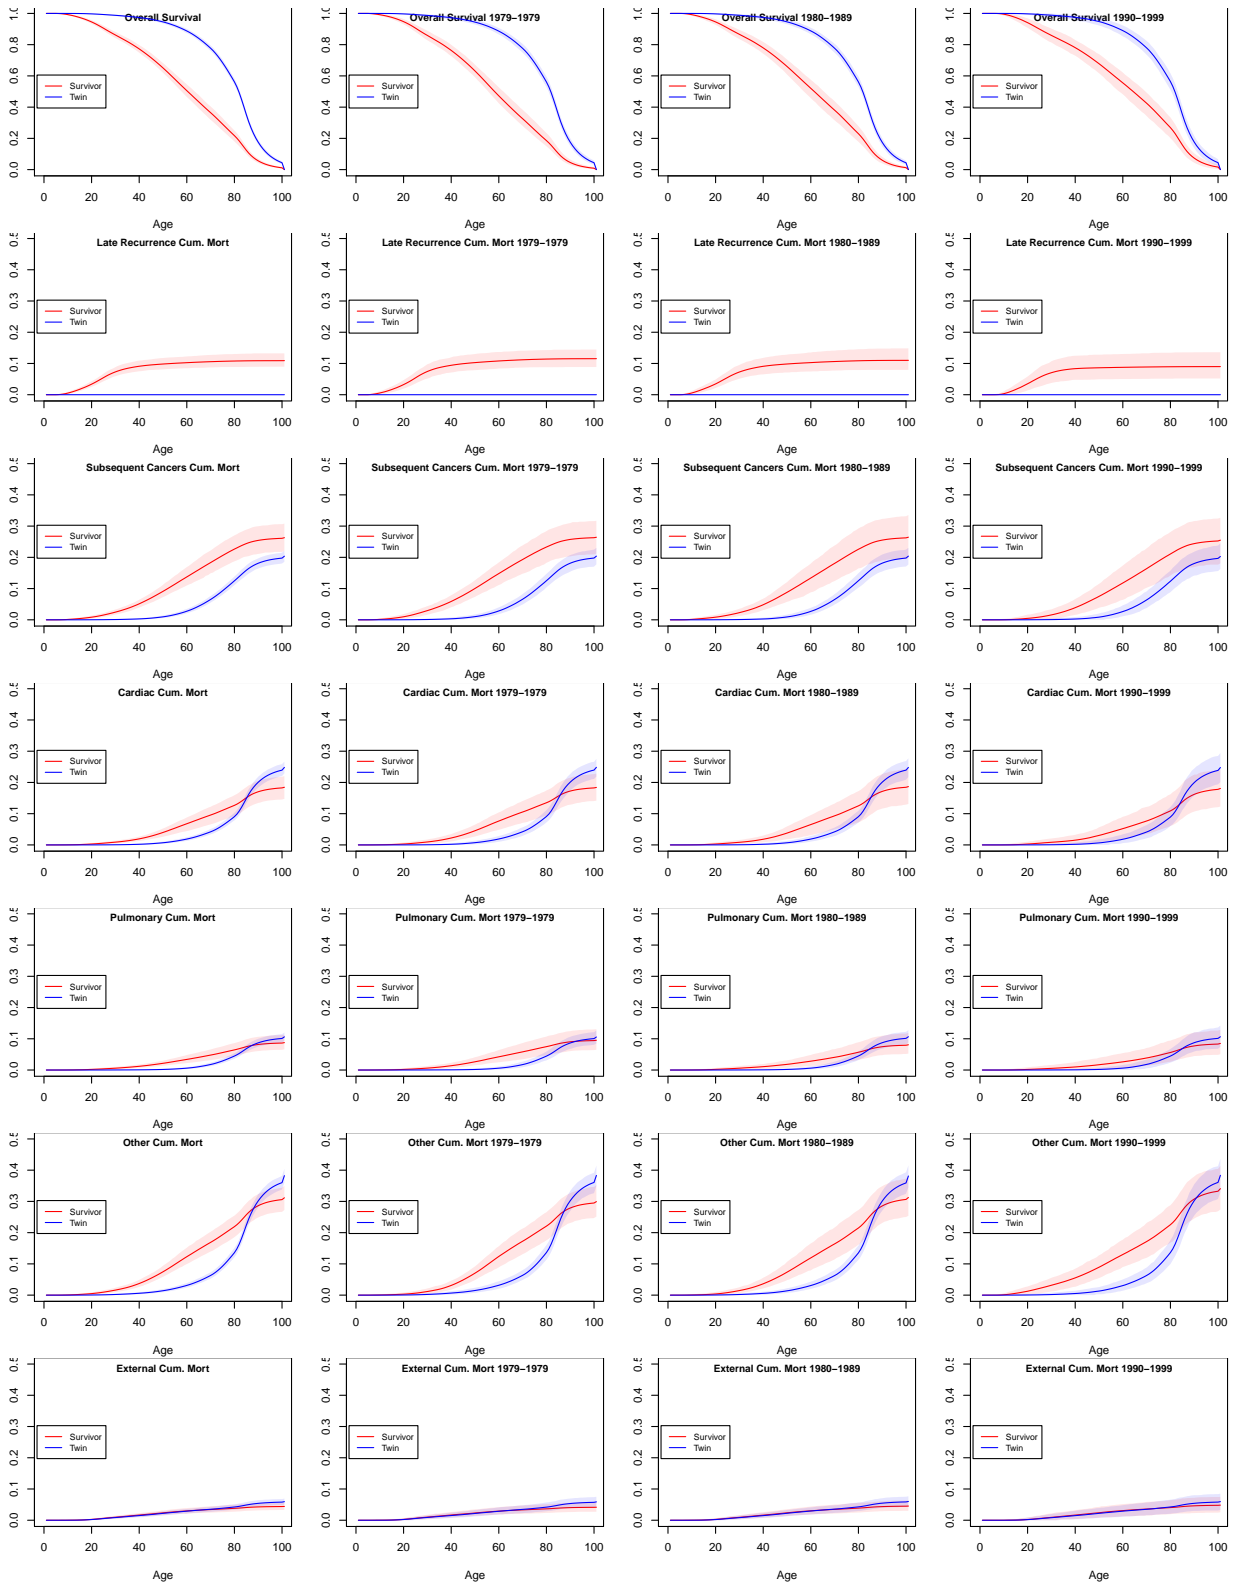

# Chemoradiotherapy

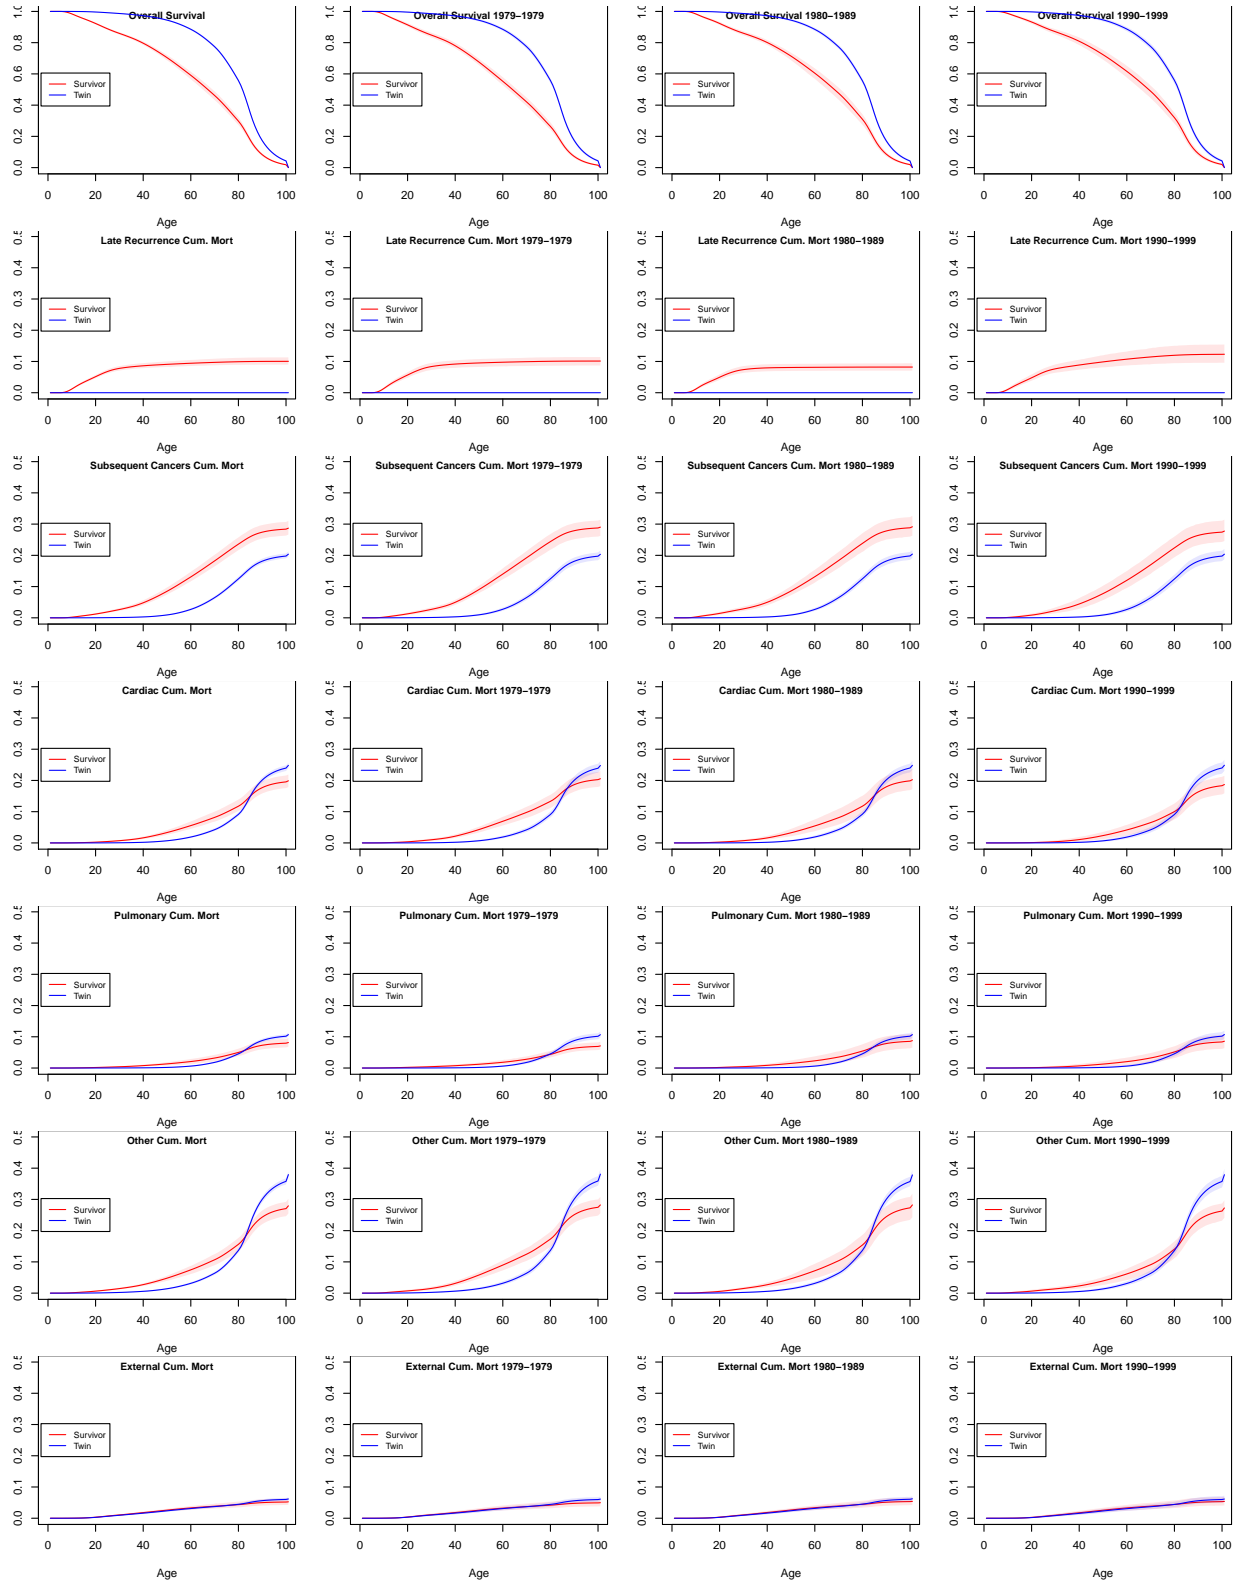



# Any Radiotherapy

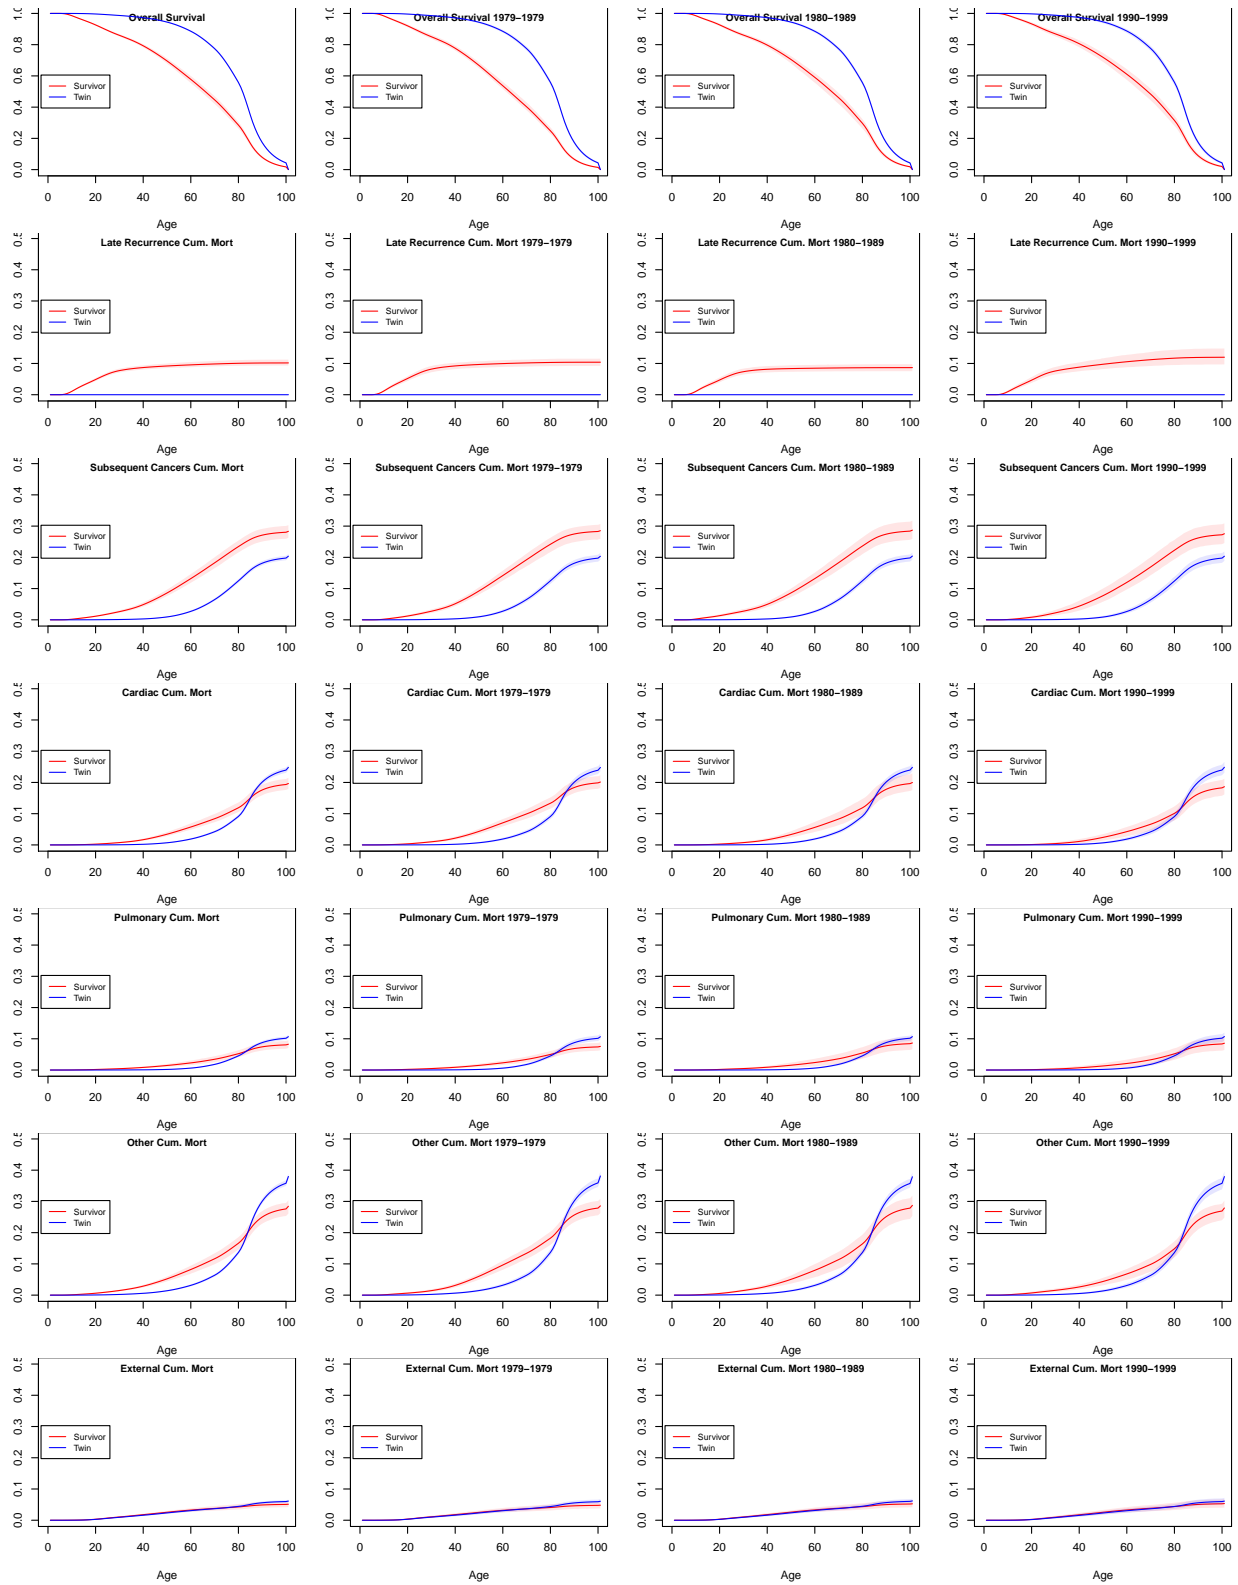

# Any Chemotherapy

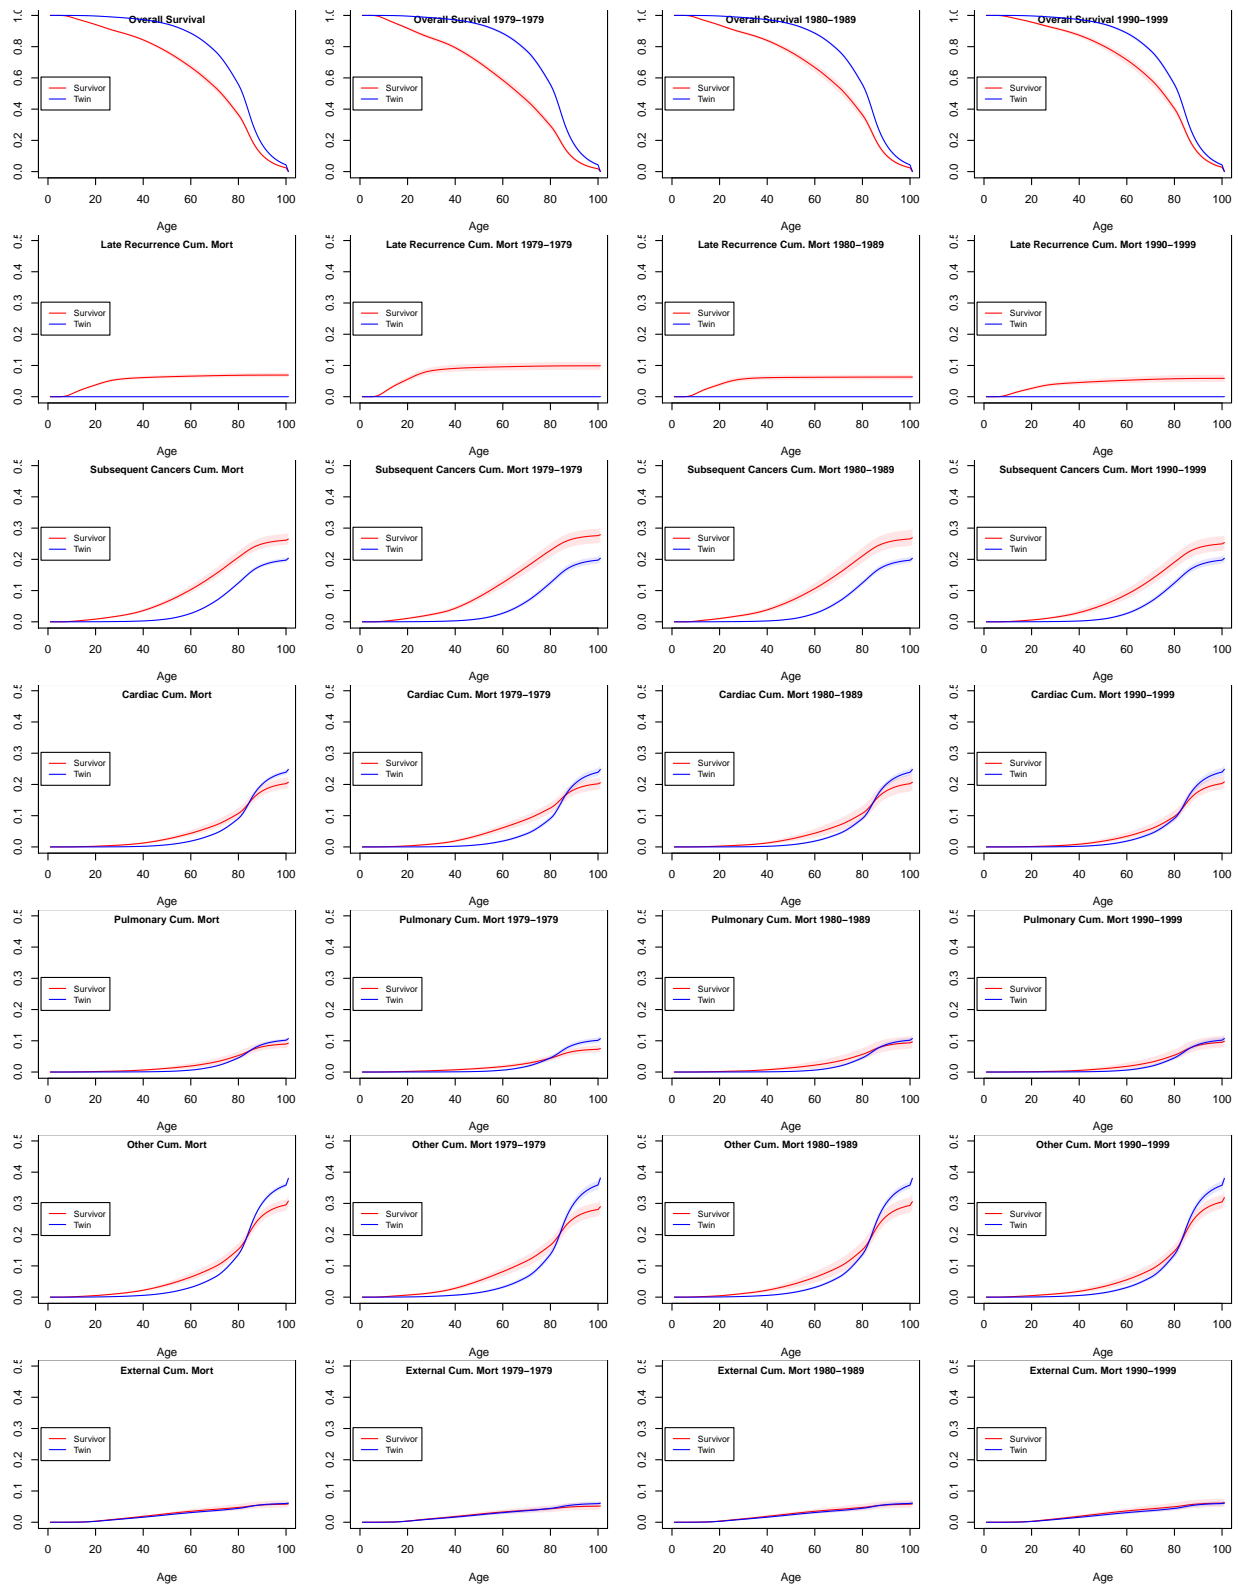

## Subgroup Analysis - Acute Lymphoblastic Leukemia

### CCSS Cohort

For this subgroup analysis we included individual-level data for 5,794 Acute Lymphoblastic Leukemia (ALL) survivors from our CCSS dataset. Each respondent was weighted with inverse probability weights (IPW) as described above.

### Model Calibration

We re-calibrated the model to ALL-specific estimated survival curves (overall) and cumulative mortality (cause-specific), using the same calibration approach as described above.

### Scores

Here we plot the calibration scores and the top 50 sets (highlighted in red).

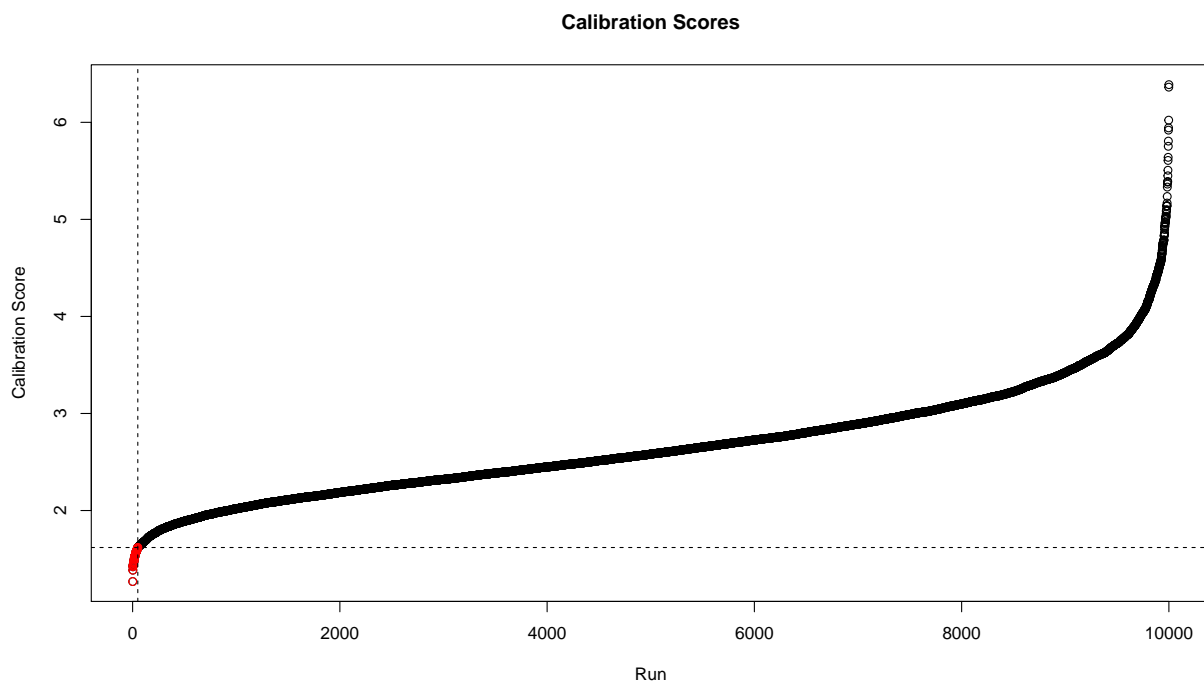

## Calibrated Parameters

Here we compare our treatment era-specific calibrated parameters to the estimates based on CCSS data. Black lines indicate CCSS estimates (solid = mean, dashed = 95% CI), and blue lines indicate parameter sets identified via calibration.

### Late recurrence mortality (annual rate)

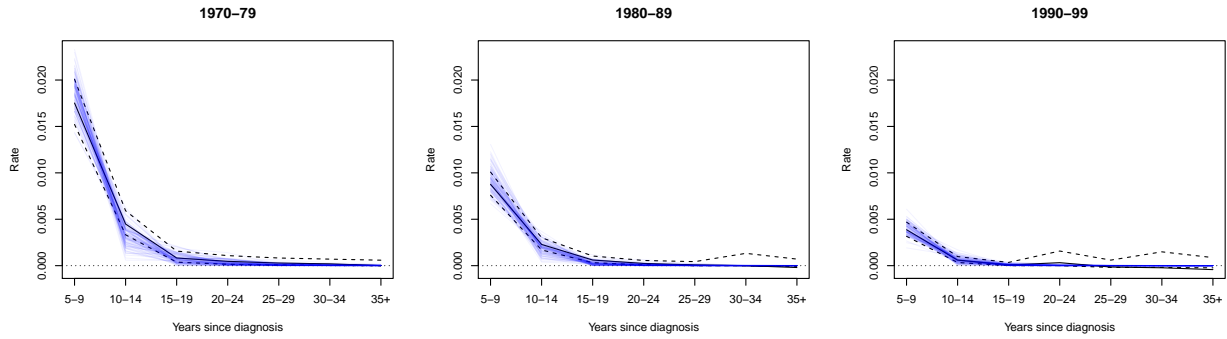

### Absolute excess risk (AER) for late effects (annual rate)

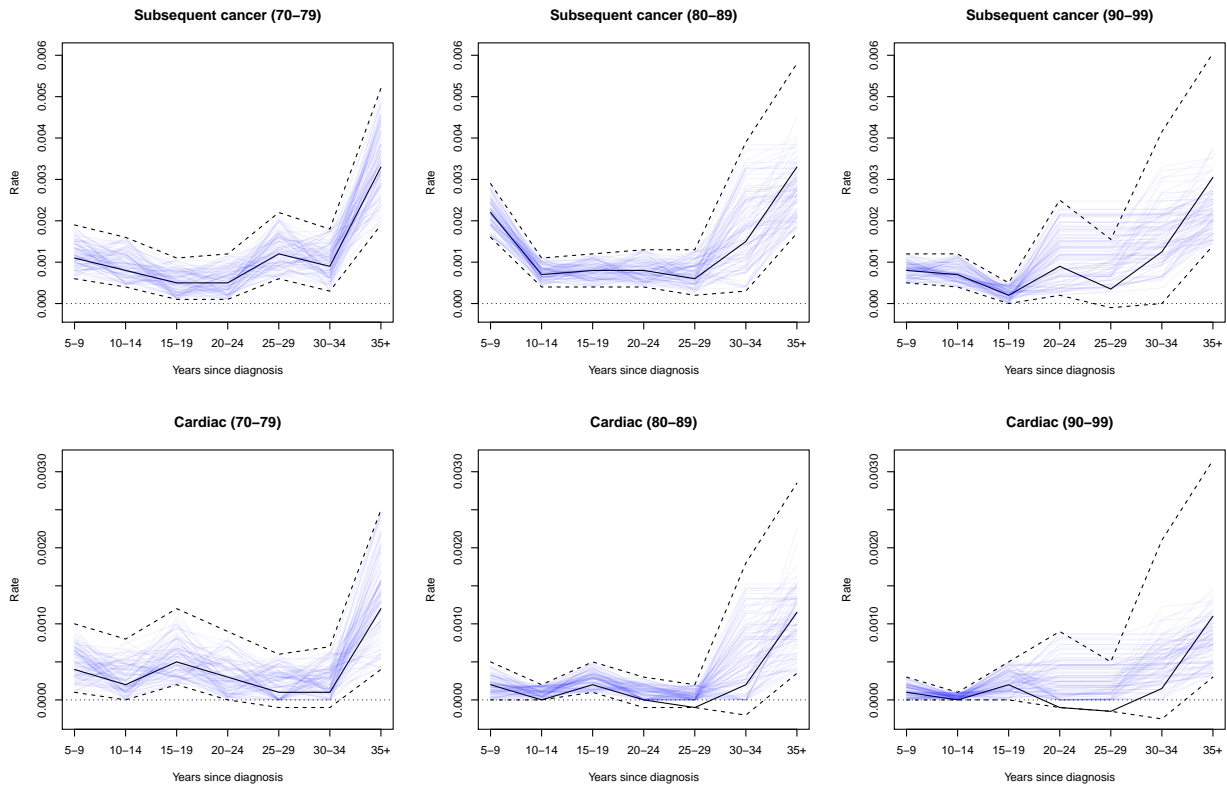

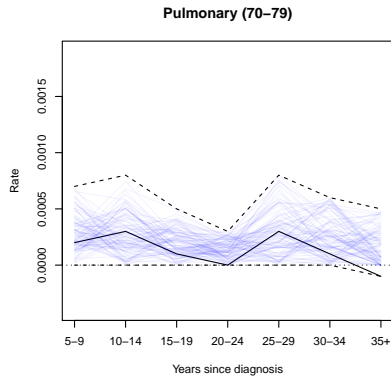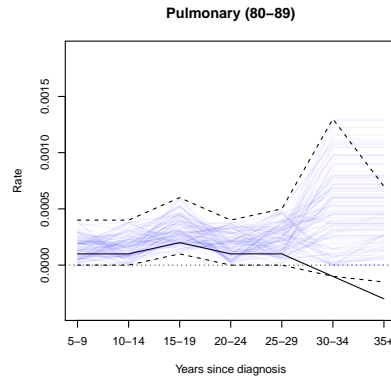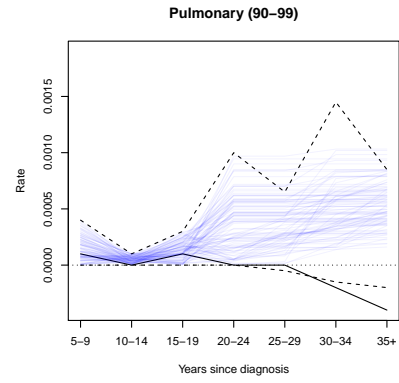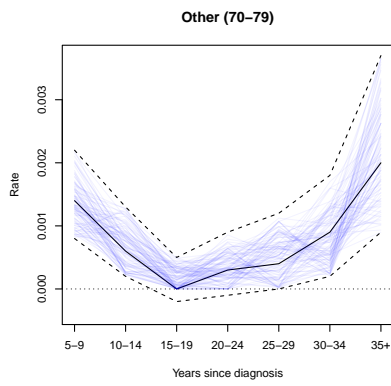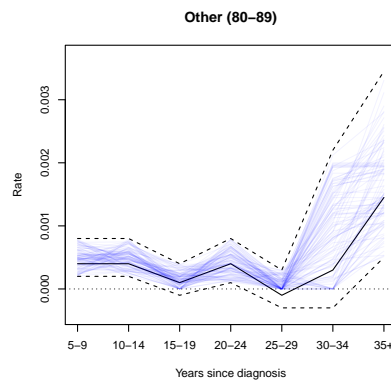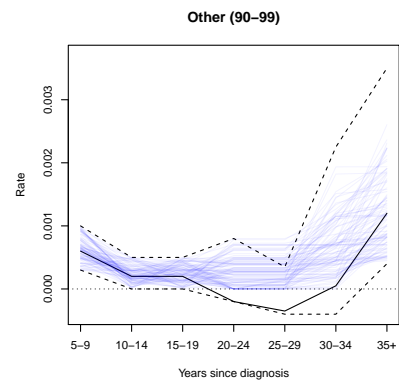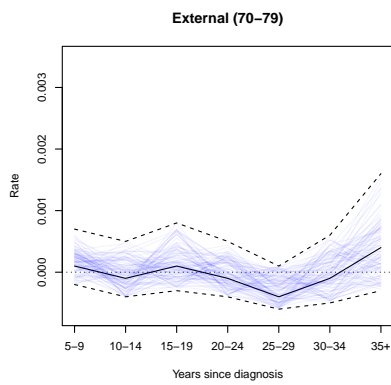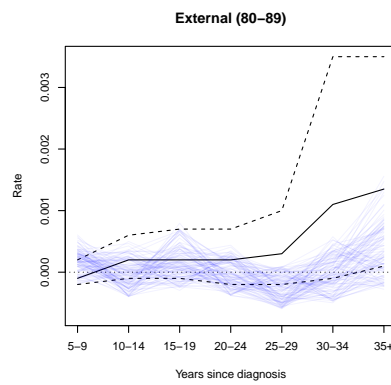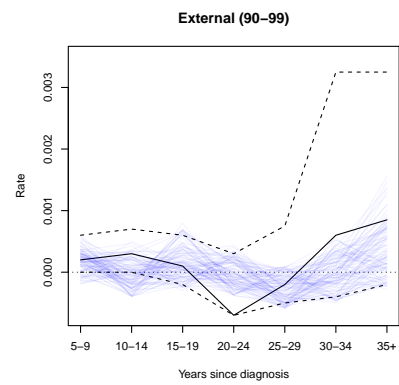

## Calibration Targets

Here we plot our calibrated model estimates of survival (overall) and cumulative mortality (cause-specific) by years since diagnosis compared to the observed CCSS estimates (shown in black). Red = modeled survivors. Shaded regions = 95% uncertainty intervals (UI) among 1000 iterations.

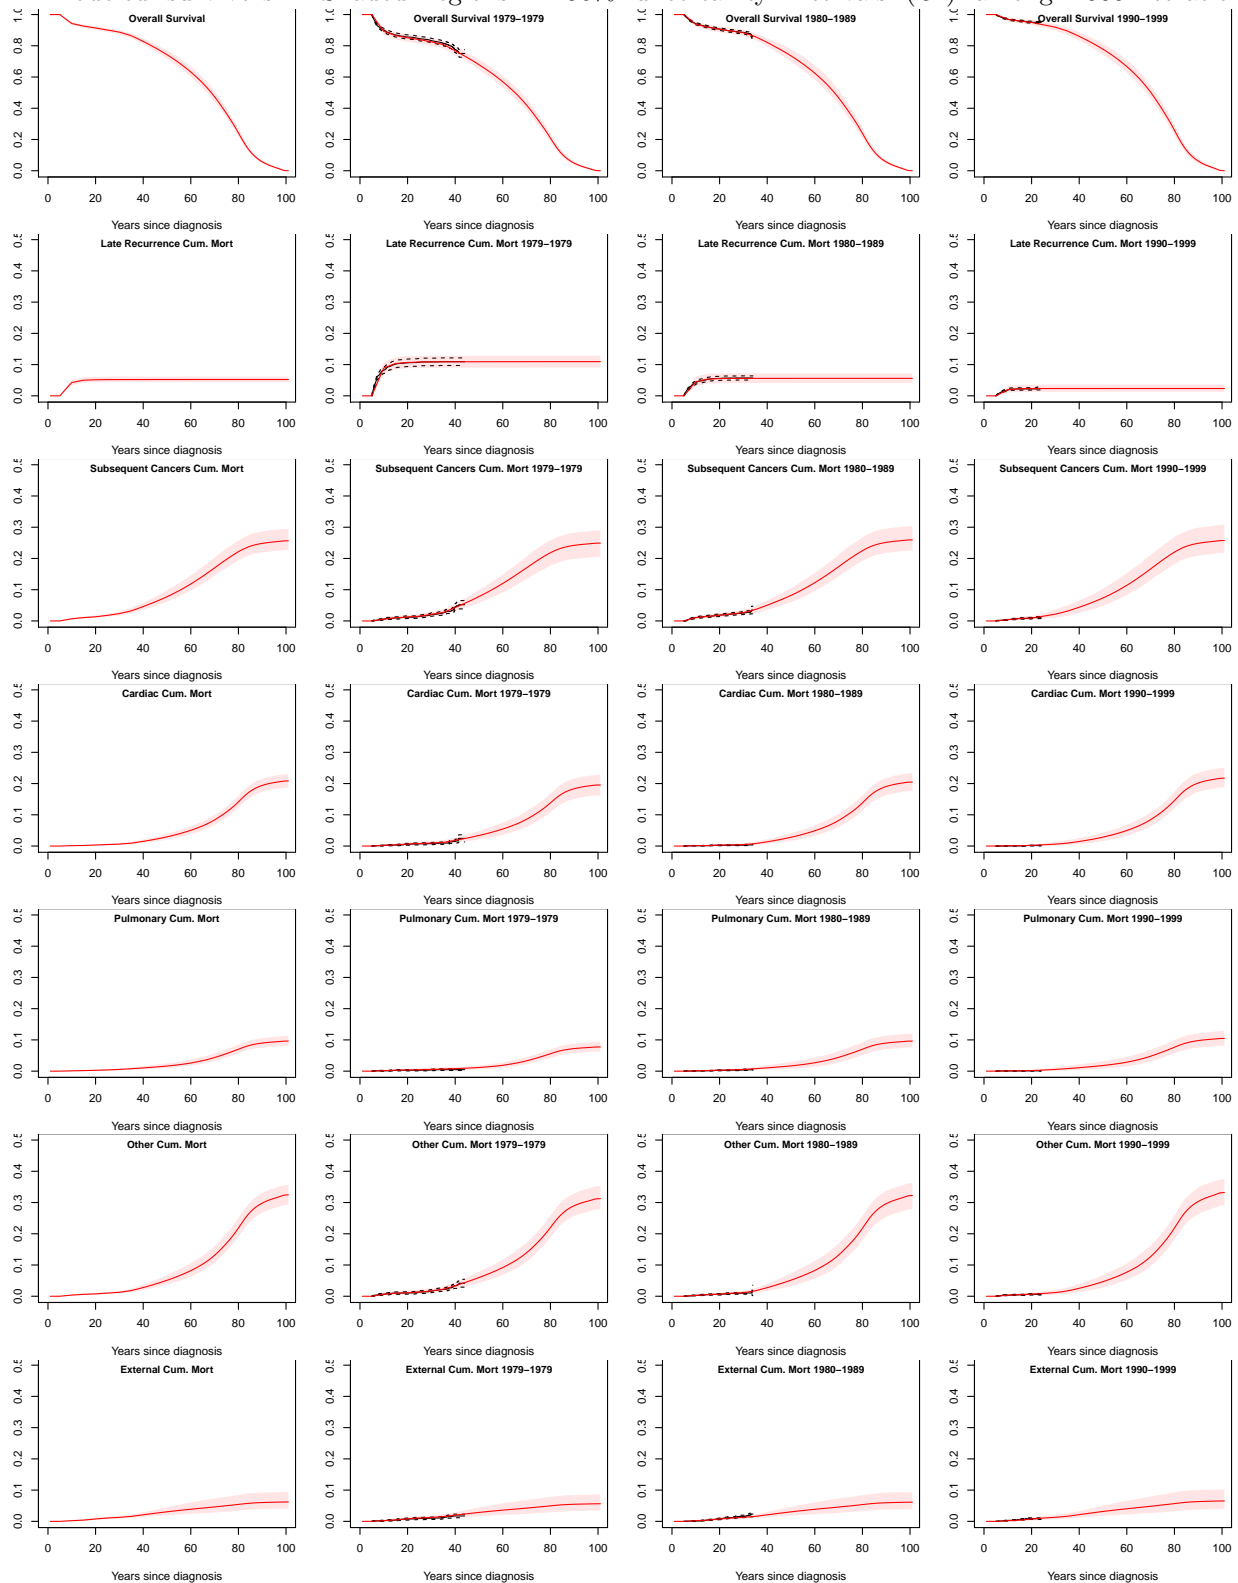

# Model Outcomes

## Life Expectancy

Total

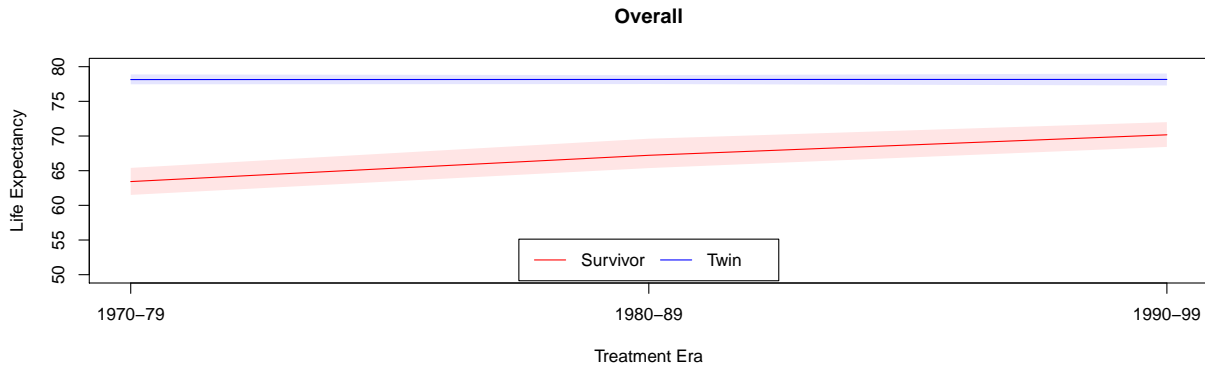

Conditional

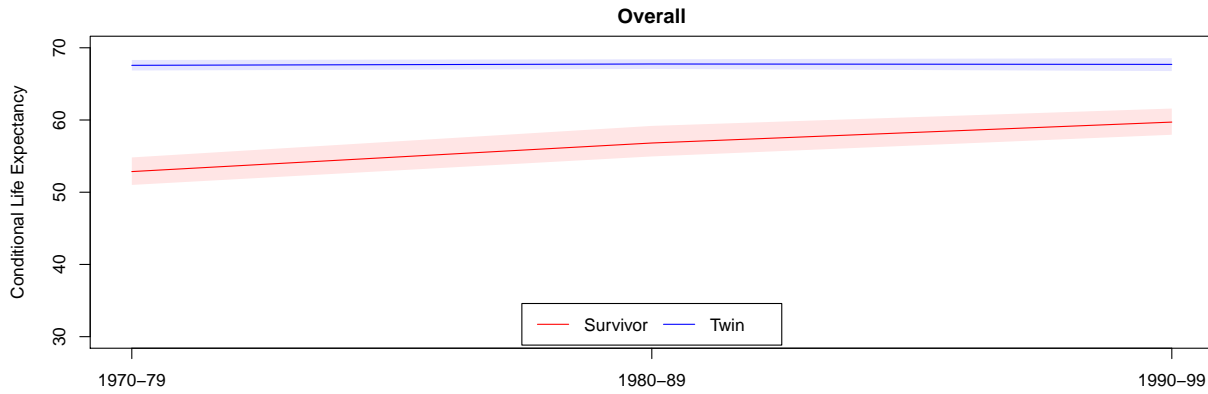

Loss of Conditional LE

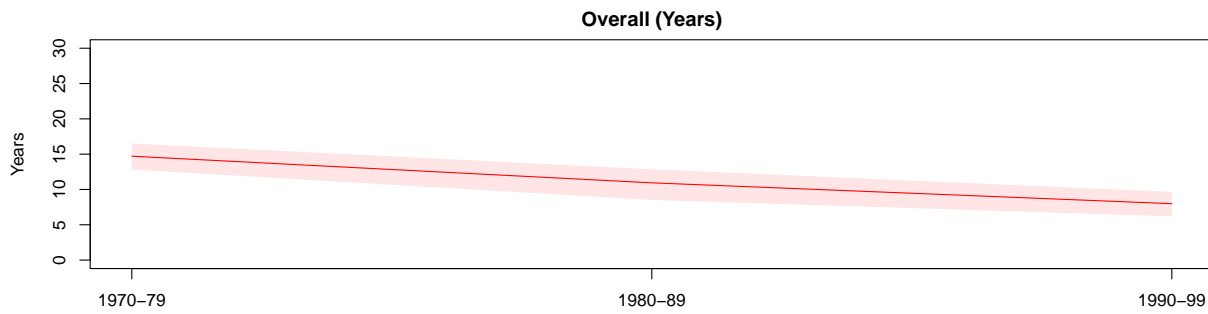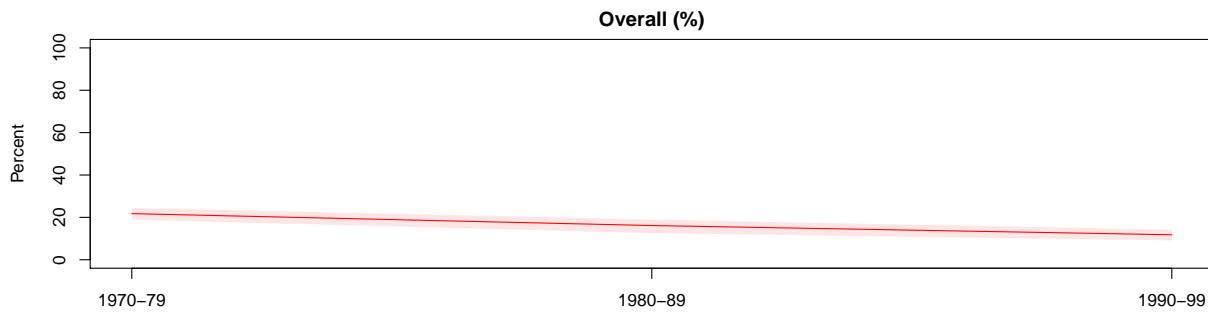

# Ten-Year Mortality Risk

## Overall

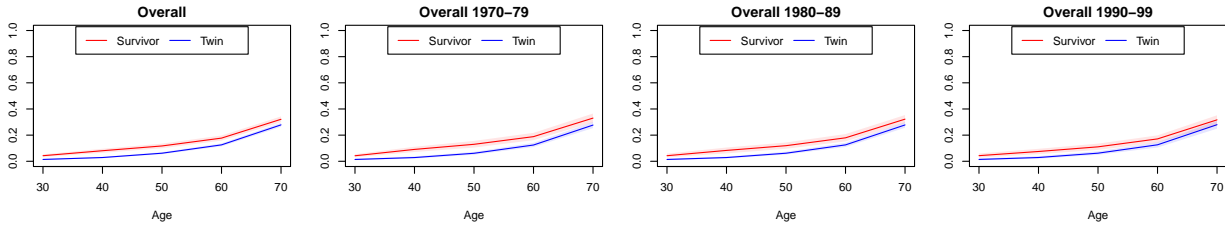

## Late Recurrence

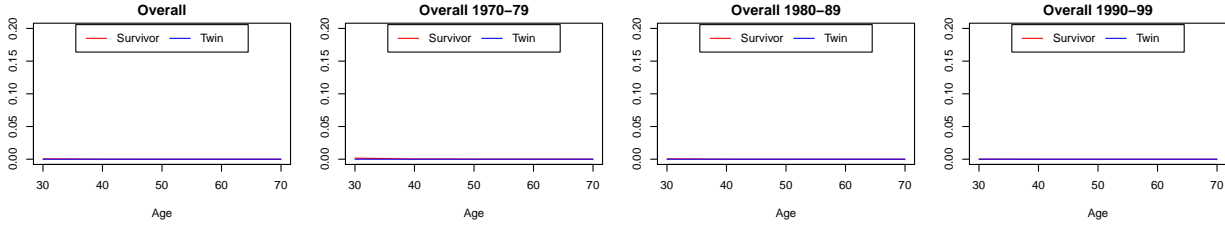

## Subsequent Cancers

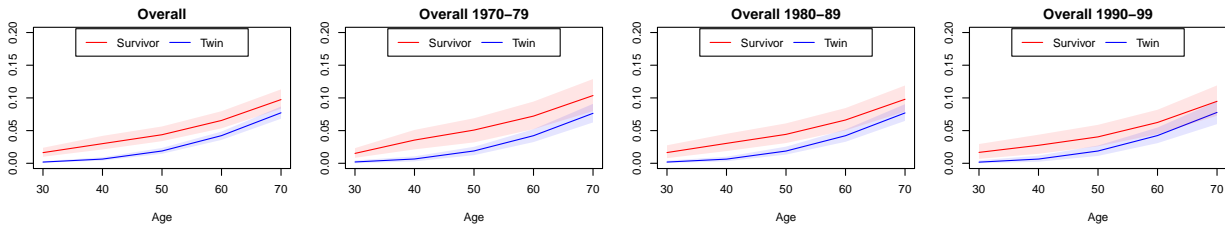

## Cardiac

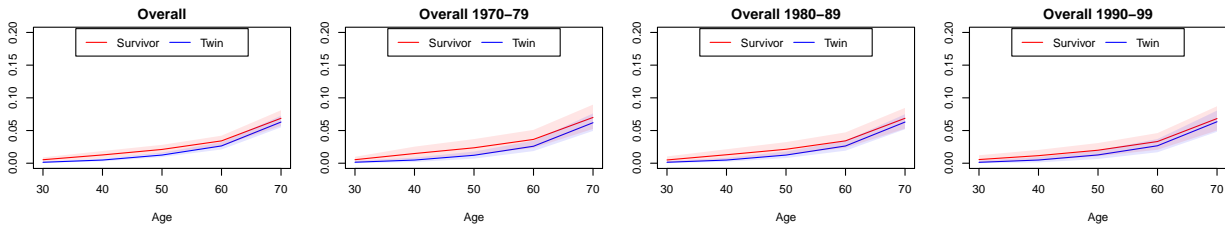

## Pulmonary

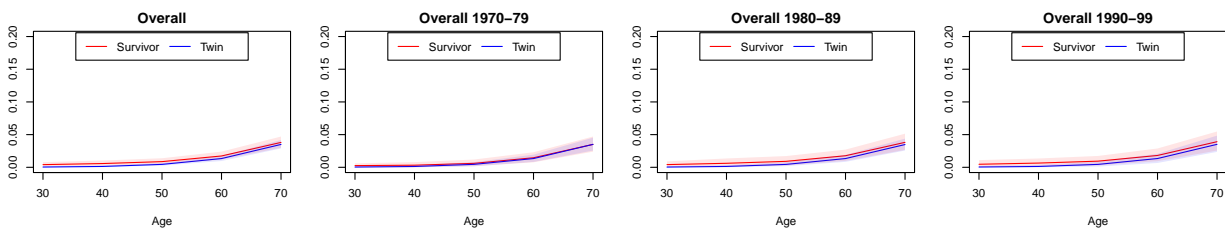

## Other

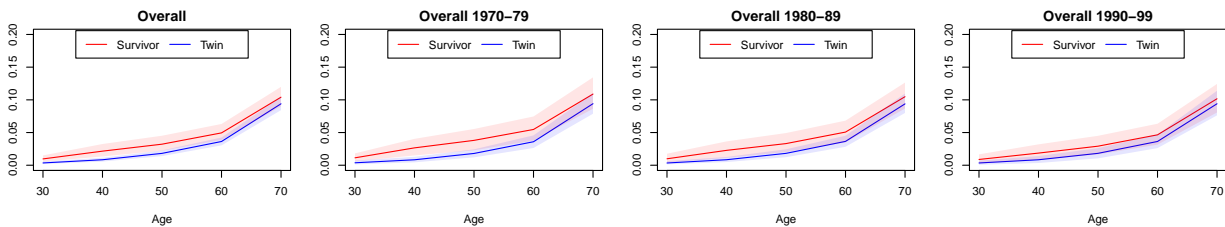

## External



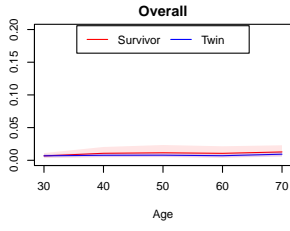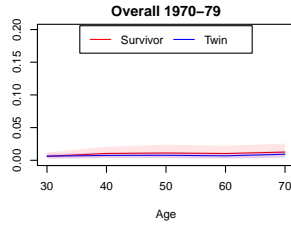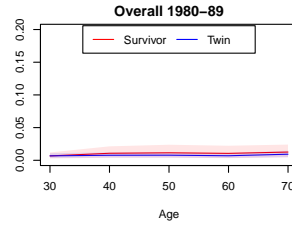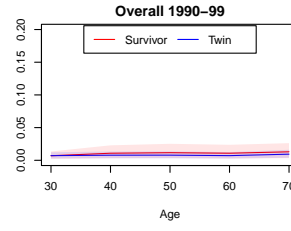

# Survival Curves/Cumulative Mortality by Age

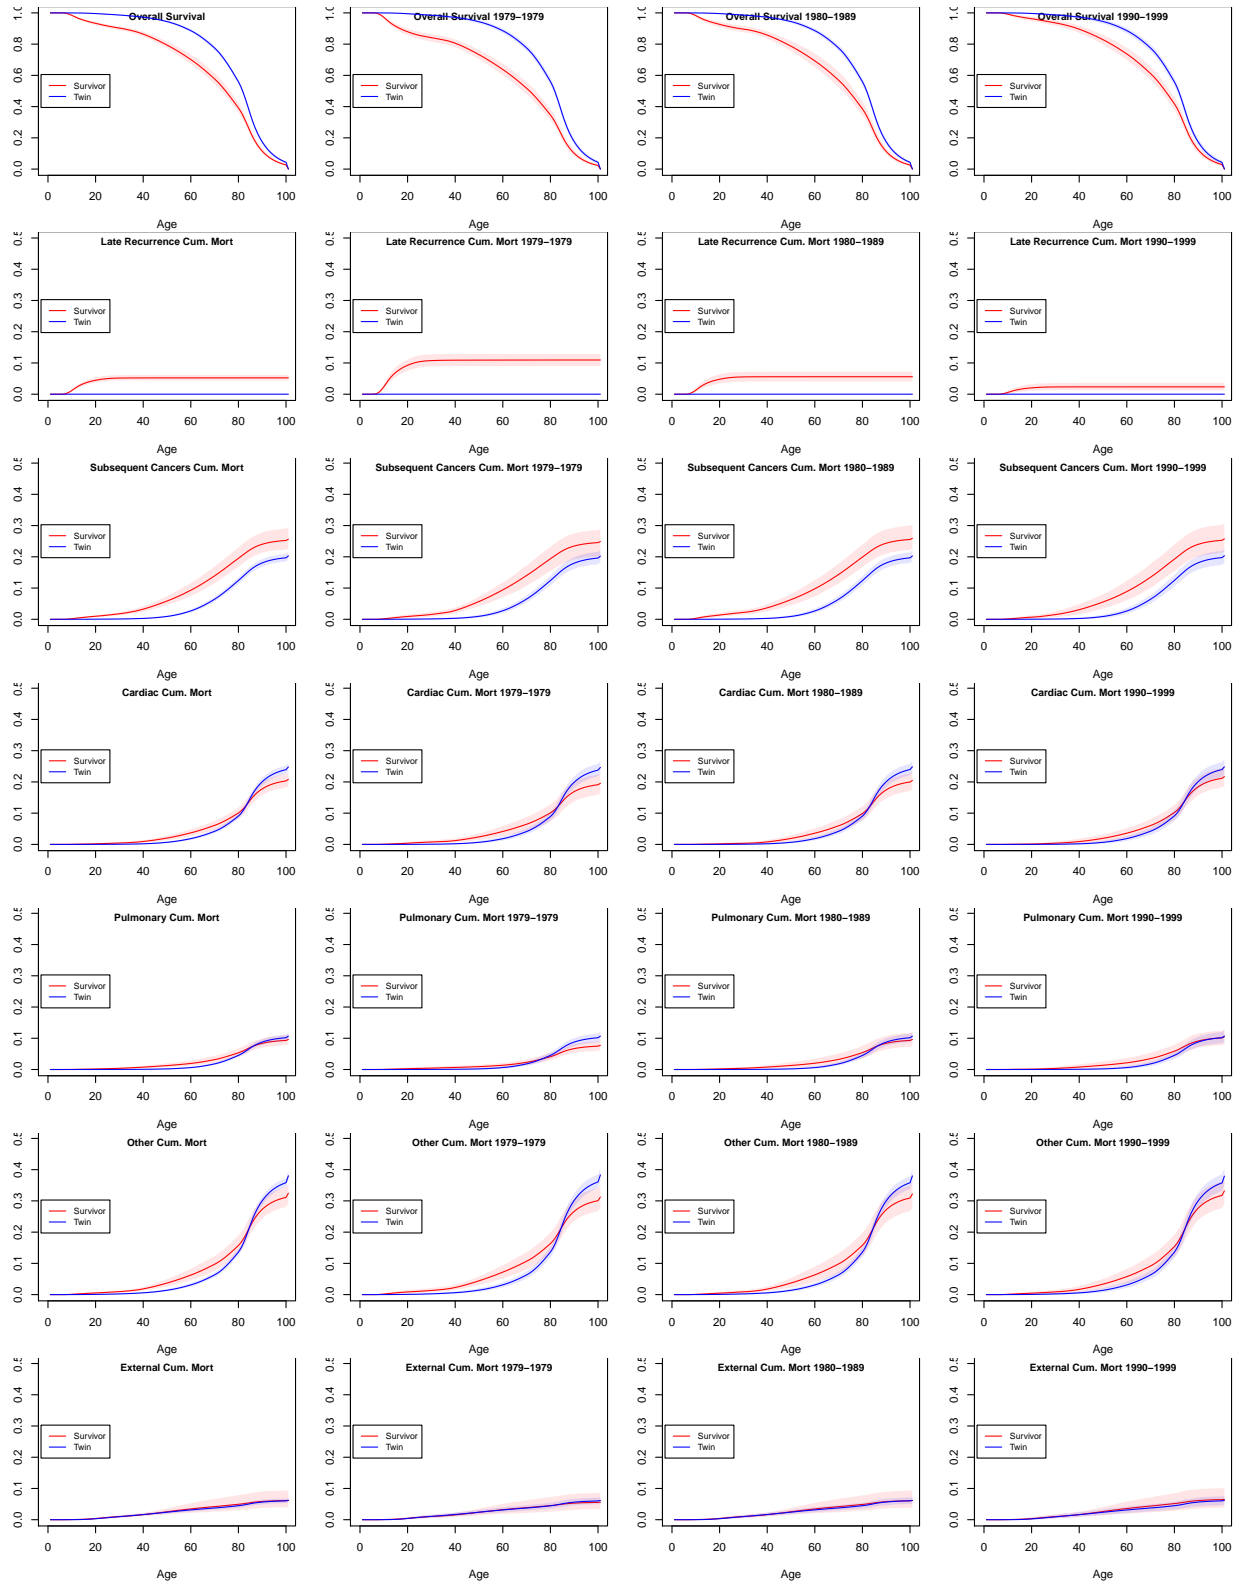

eFigure 1. Model diagram

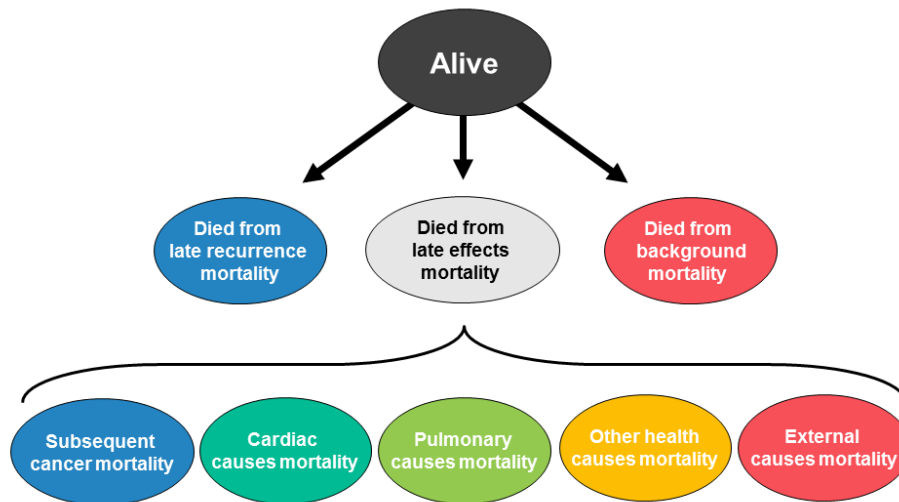

At the start of the simulation, a cohort of five-year cancer survivors enters the model. Each year, individuals face competing risks of dying from background mortality, late recurrence of their original cancer and late effects. Late effects include including health-related (subsequent (primary) cancers, cardiac events, pulmonary conditions, other health causes) and external causes (accidents, suicides, and poisonings). Individuals are followed throughout their lifetime (or until age 100).

**eFigure 2. Projected gap in life expectancy among survivors diagnosed in 1970s, 1980s and 1990s: Overall cohort and acute lymphoblastic leukemia (ALL) subgroup**

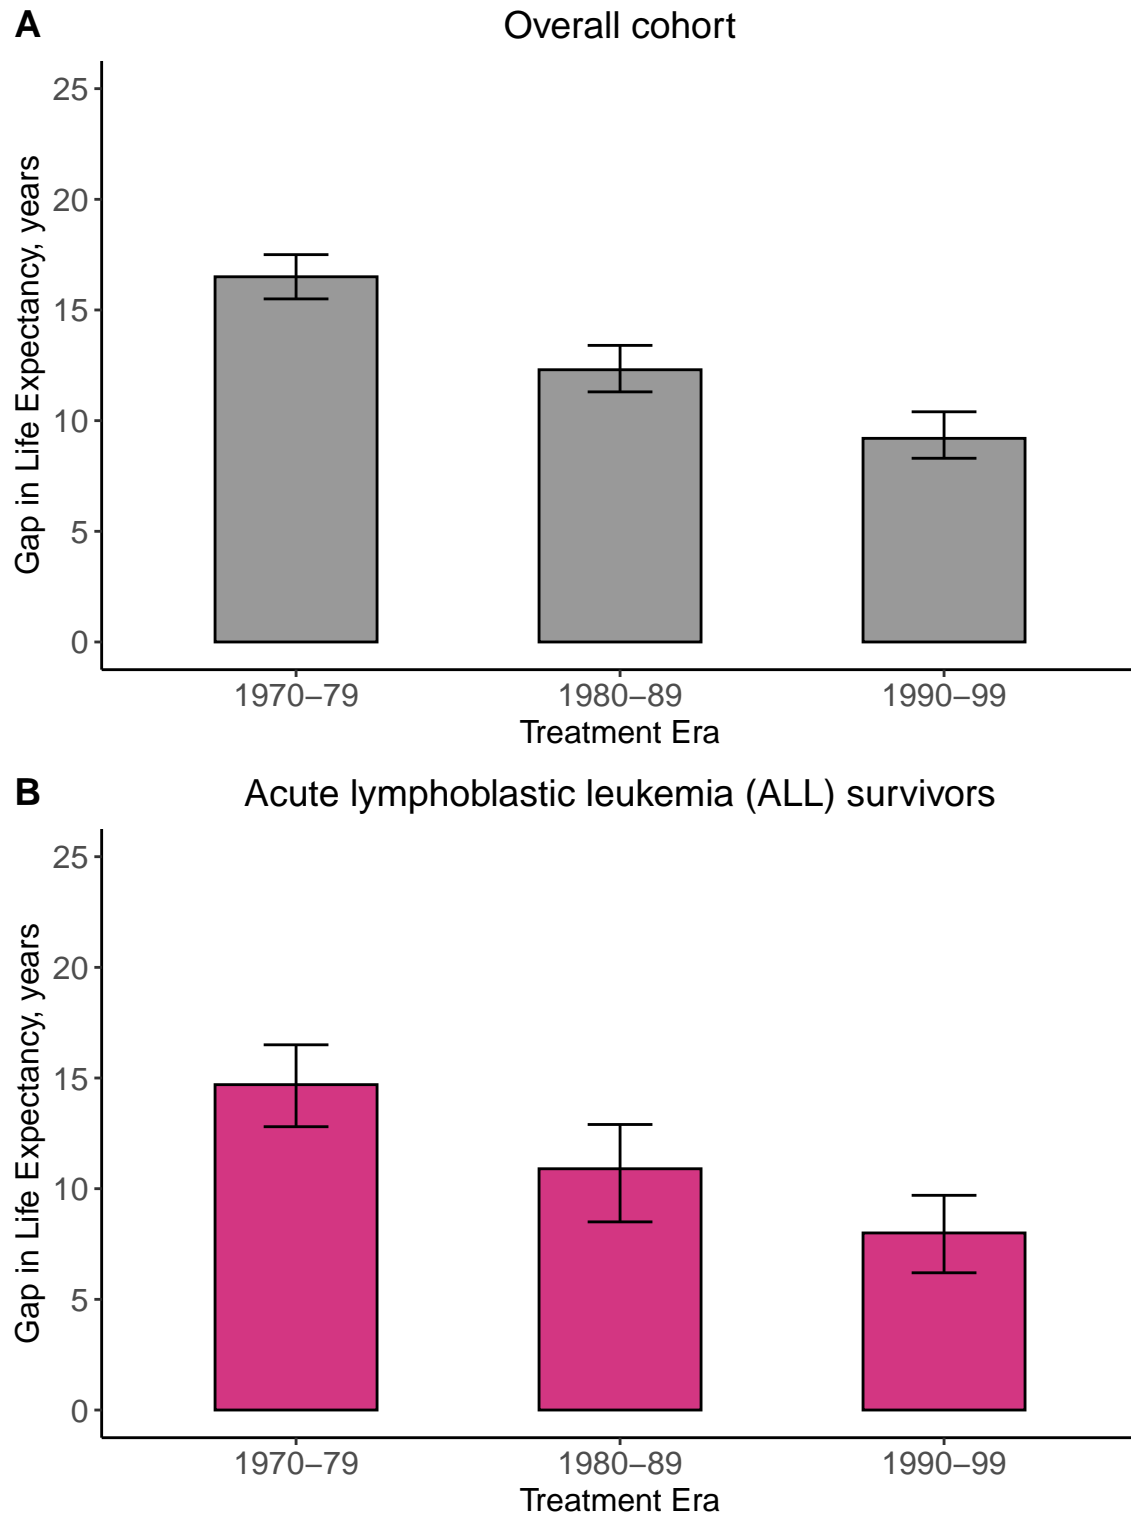

### eFigure 3. Cohort composition by treatment era

Panel A: Distribution by cancer diagnoses

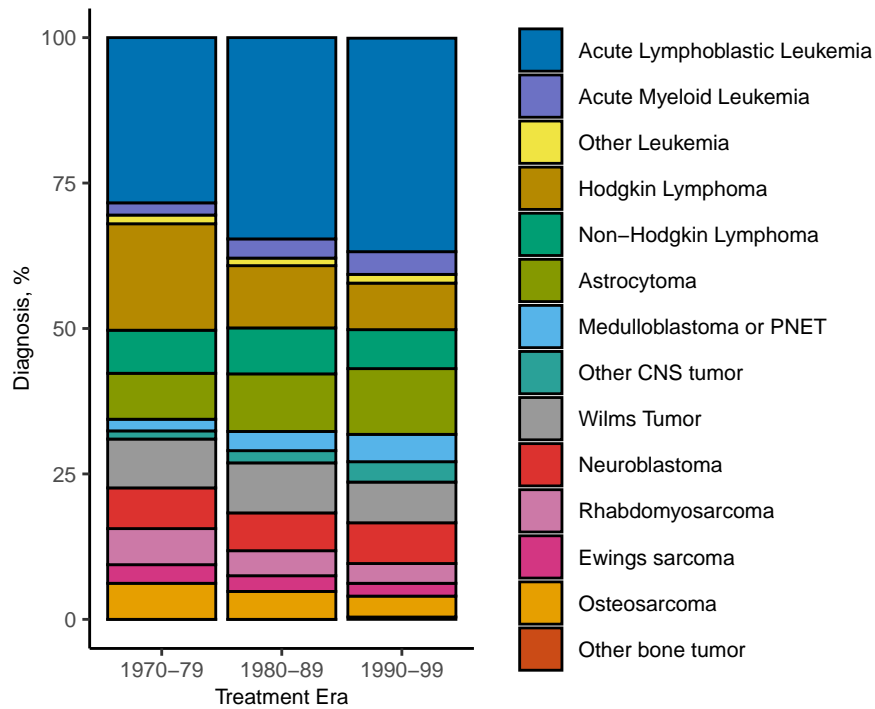

Panel B: Distribution by broad treatment subgroups

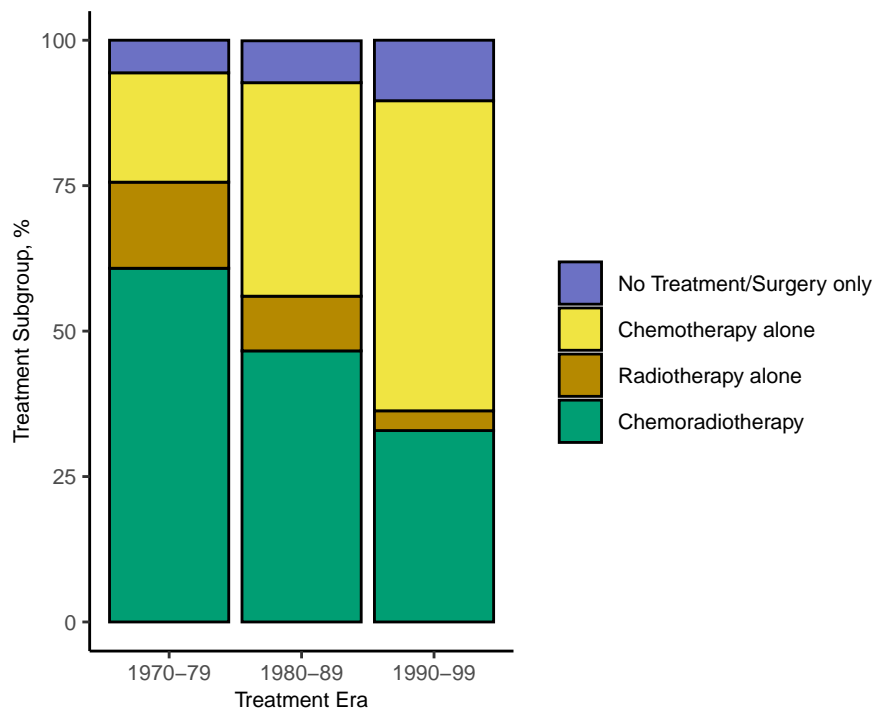

**eFigure 4. Projected cumulative mortality risks among survivors diagnosed in the 1970s, 1980s and 1990s: Overall cohort and acute lymphoblastic leukemia (ALL) subgroup**

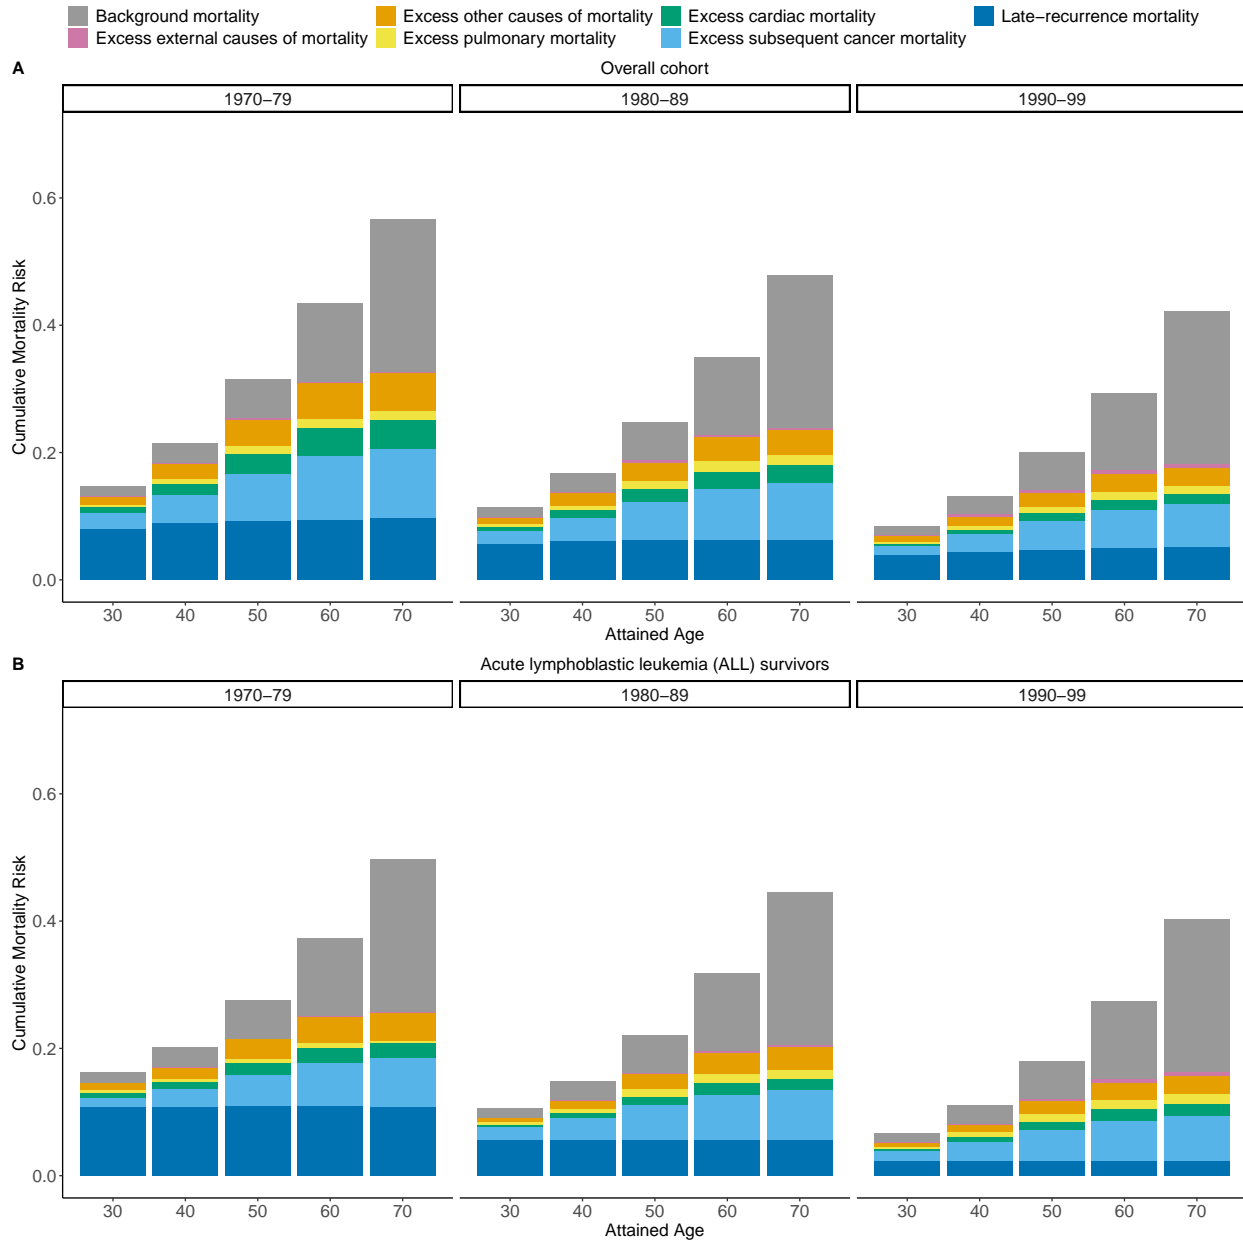

**eFigure 5. Projected relative 10-year mortality risk among survivors diagnosed in 1970-79, 1980-89 and 1990-99 by attained age (compared to general population)**

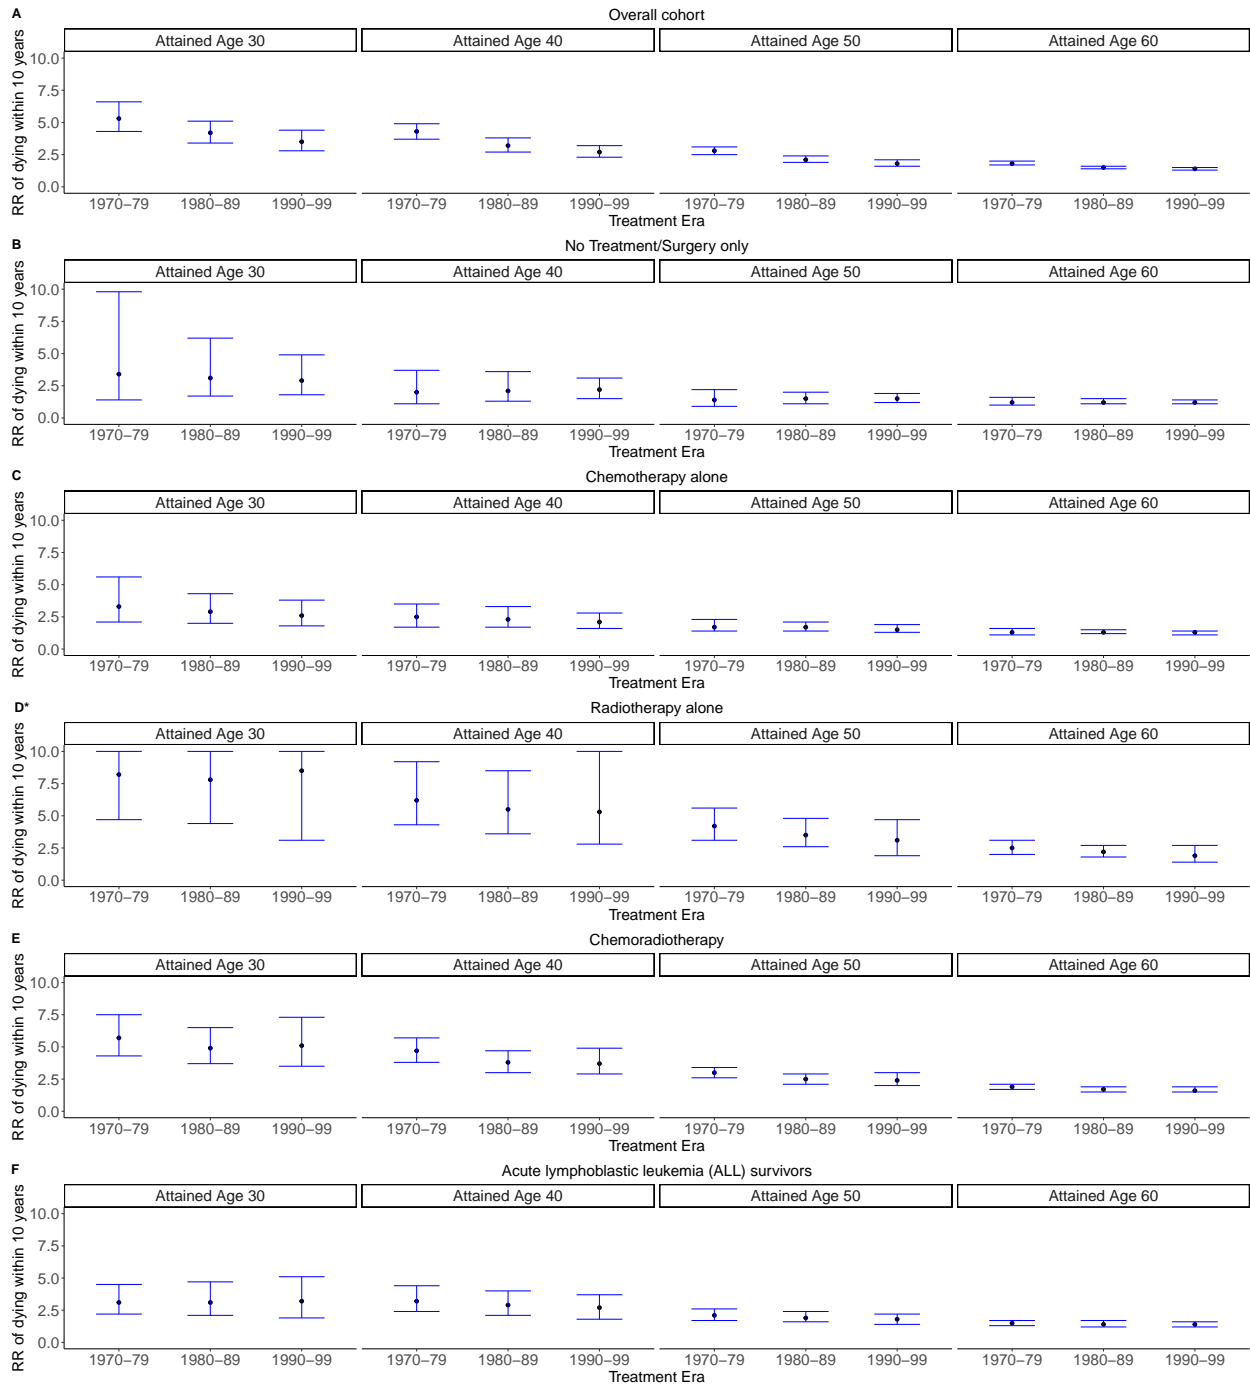

Overall cohort (Panel A), no treatment/surgery only (Panel B), chemotherapy alone (Panel C), radiotherapy only (Panel D), chemoradiotherapy (Panel E), and ALL survivors (Panel F). Note: same relative risk (RR) scale for all subgroups, except radiotherapy alone (Panel D) as denoted by the asterisk, for which the upper bound of the 95% uncertainty interval exceeded RR = 10 at age 30 for all treatment eras.

# eFigure 6. Cause-specific attributable proportion of projected 10-year mortality risk conditional upon surviving to age 30, 40, 50 and 60 among survivors diagnosed in 1970-79, 1980-89, 1990-99

Panels: A = Overall Cohort, B = No treatment/Surgery only, C = Chemotherapy alone, D = Radiotherapy alone, E = Chemoradiotherapy, and F = Acute lymphoblastic leukemia survivors

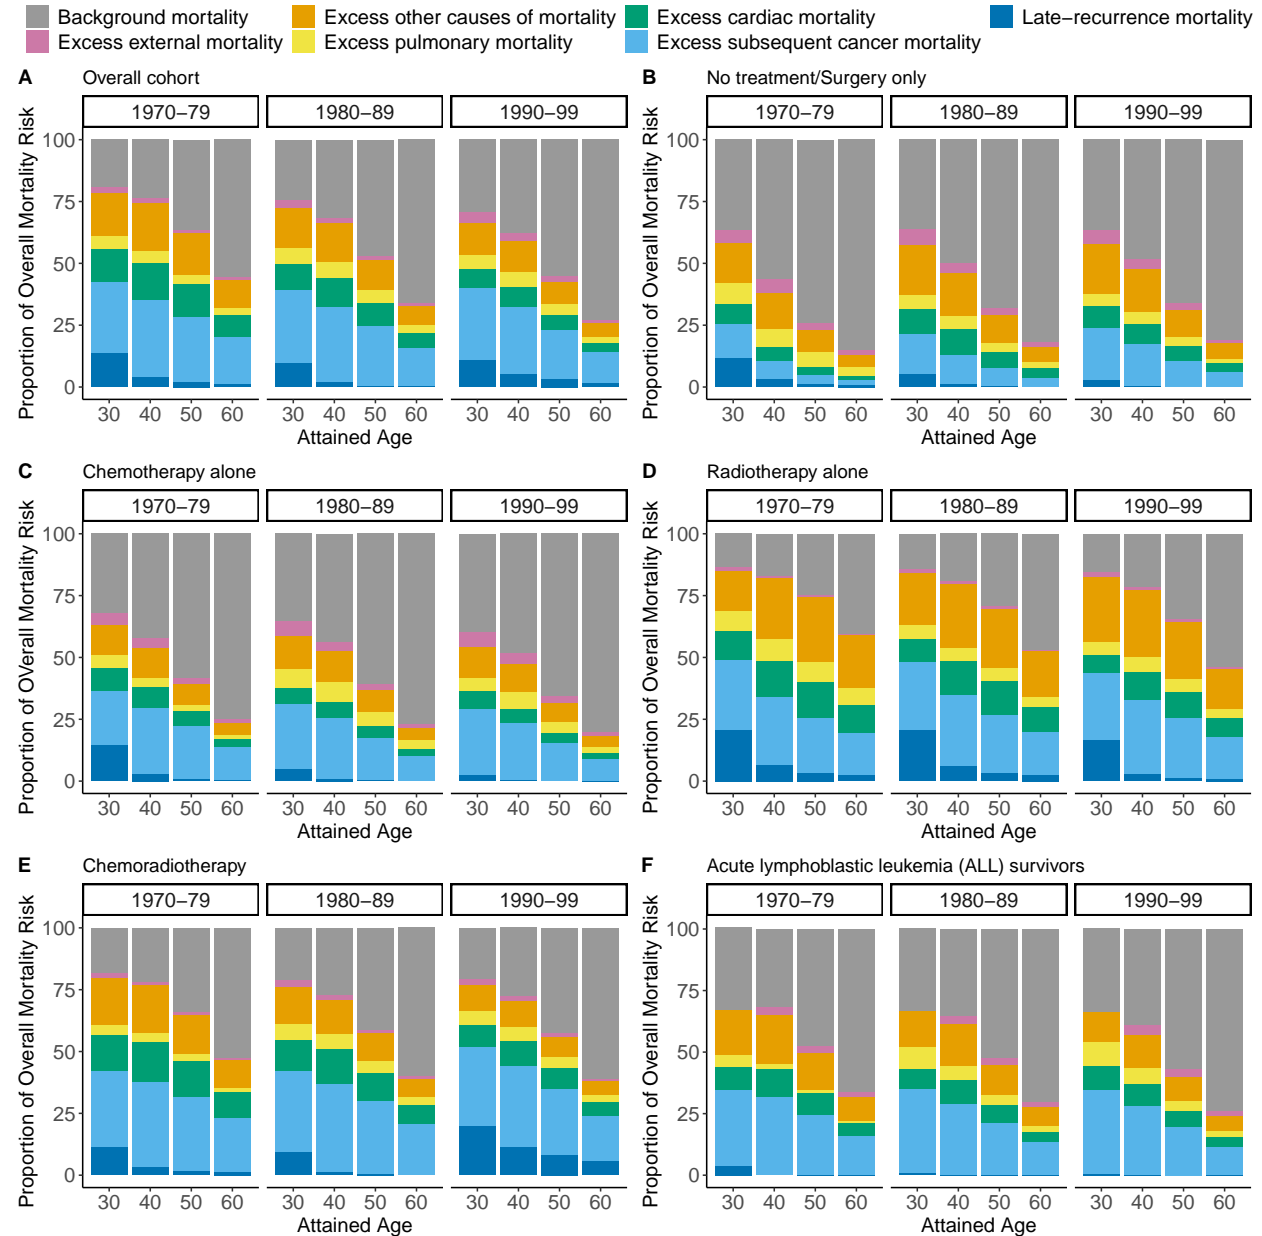



**eTable 1. Patient Characteristics and Treatment Subgroup: Overall cohort of survivors of childhood and adolescent cancer**

| Characteristic <sup>a</sup>                          | Overall<br>1970-1999 |                  | 1970-1979          |                  | Treatment Era<br>1980-1989 |                  | 1990-1999          |                  |
|------------------------------------------------------|----------------------|------------------|--------------------|------------------|----------------------------|------------------|--------------------|------------------|
|                                                      | N                    | %                | N                  | %                | N                          | %                | N                  | %                |
| Participants                                         | 22150                | 100              | 5806               | 23.6             | 8760                       | 36               | 7584               | 40.4             |
| <i>Sex</i>                                           |                      |                  |                    |                  |                            |                  |                    |                  |
| Male                                                 | 11866                | 55.9             | 3089               | 55.6             | 4746                       | 56.1             | 4031               | 55.8             |
| Female                                               | 10284                | 44.1             | 2717               | 44.4             | 4014                       | 43.9             | 3553               | 44.2             |
| <i>Age at diagnosis, years</i>                       |                      |                  |                    |                  |                            |                  |                    |                  |
| 0 to 4                                               | 8841                 | 42.5             | 2201               | 37.7             | 3722                       | 43.9             | 2918               | 43.9             |
| 5 to 9                                               | 4991                 | 23.7             | 1331               | 23               | 1930                       | 22.8             | 1730               | 25.1             |
| 10 to 14                                             | 4660                 | 19.1             | 1204               | 20.7             | 1747                       | 18.8             | 1709               | 18.4             |
| 15 to 19                                             | 3658                 | 14.7             | 1070               | 18.6             | 1361                       | 14.5             | 1227               | 12.5             |
| Mean (Range)                                         | 7.3 (0-20)           |                  | 8.1 (0-20)         |                  | 7.2 (0-20)                 |                  | 6.9 (0-20)         |                  |
| <i>Follow-up (years since diagnosis)<sup>b</sup></i> |                      |                  |                    |                  |                            |                  |                    |                  |
| Mean (Range)                                         | 20.5 (5-39)          |                  | 27.6 (5-39)        |                  | 21.2 (5-30)                |                  | 15.7 (5-24)        |                  |
| <i>Attained age<sup>b</sup></i>                      |                      |                  |                    |                  |                            |                  |                    |                  |
| Mean (Range)                                         | 27.8 (5-58)          |                  | 35.7 (5-58)        |                  | 28.4 (5-49)                |                  | 22.6 (6-42)        |                  |
| <i>Diagnosis</i>                                     |                      |                  |                    |                  |                            |                  |                    |                  |
| Leukemia                                             | 6916                 | 38.7             | 1922               | 32.1             | 3091                       | 39.1             | 1903               | 42.1             |
| Acute Lymphoblastic Leukemia                         | 5794                 | 34               | 1726               | 28.4             | 2674                       | 34.6             | 1394               | 36.7             |
| Acute Myeloid Leukemia                               | 833                  | 3.3              | 128                | 2.1              | 318                        | 3.3              | 387                | 3.9              |
| Other Leukemia                                       | 289                  | 1.4              | 68                 | 1.5              | 99                         | 1.3              | 122                | 1.5              |
| Hodgkin Lymphoma                                     | 2872                 | 11.4             | 1054               | 18.3             | 1009                       | 10.7             | 809                | 8                |
| Non-Hodgkin Lymphoma                                 | 1835                 | 7.3              | 428                | 7.4              | 740                        | 7.9              | 667                | 6.7              |
| Central nervous system tumor                         | 3848                 | 16.1             | 618                | 11.3             | 1368                       | 15.3             | 1862               | 19.5             |
| Astrocytoma                                          | 2349                 | 10               | 429                | 7.9              | 863                        | 9.9              | 1057               | 11.3             |
| Medulloblastoma or PNET                              | 904                  | 3.5              | 115                | 2                | 316                        | 3.3              | 473                | 4.7              |
| Other                                                | 595                  | 2.5              | 74                 | 1.4              | 189                        | 2.1              | 332                | 3.5              |
| Wilms Tumor                                          | 2031                 | 7.9              | 492                | 8.4              | 823                        | 8.6              | 716                | 7                |
| Neuroblastoma                                        | 1706                 | 6.8              | 408                | 7                | 615                        | 6.5              | 683                | 7                |
| Rhabdomyosarcoma                                     | 1087                 | 4.4              | 349                | 6.2              | 405                        | 4.3              | 333                | 3.4              |
| Bone Tumor                                           | 1855                 | 7.5              | 535                | 9.4              | 709                        | 7.6              | 611                | 6.3              |
| Ewing sarcoma                                        | 673                  | 2.6              | 189                | 3.2              | 262                        | 2.7              | 222                | 2.2              |
| Osteosarcoma                                         | 1135                 | 4.7              | 343                | 6.2              | 443                        | 4.8              | 349                | 3.6              |
| Other                                                | 47                   | 0.2              | 3                  | 0                | 4                          | 0                | 40                 | 0.4              |
| <i>Treatment Subgroup (Range)<sup>c</sup></i>        |                      |                  |                    |                  |                            |                  |                    |                  |
| None                                                 | 78.4 (76-81)         | 0.3 (0.3-0.3)    | 13.4 (12-15)       | 0.2 (0.2-0.3)    | 20.5 (19-22)               | 0.2 (0.2-0.3)    | 44.5 (43-46)       | 0.5 (0.5-0.5)    |
| Surgery only                                         | 1831.4 (1821-1840)   | 7.6 (7.6-7.7)    | 275.8 (267-283)    | 4.9 (4.8-5.1)    | 617.9 (610-625)            | 6.8 (6.7-6.9)    | 937.7 (927-944)    | 10 (9.8-10.0)    |
| Chemotherapy alone                                   | 7607.4 (7584-7627)   | 39.3 (39.2-39.3) | 1048.2 (1036-1066) | 18.4 (18.1-18.6) | 3095.3 (3064-3108)         | 36.8 (36.5-37.0) | 3463.9 (3452-3470) | 53.6 (53.5-53.7) |
| Radiotherapy alone                                   | 2009.8 (1994-2027)   | 8.2 (8.1-8.3)    | 839.5 (829-856)    | 14.9 (14.7-15.2) | 840.9 (831-855)            | 9.2 (9.1-9.4)    | 329.4 (323-332)    | 3.3 (3.3-3.4)    |
| Chemoradiotherapy                                    | 10623 (10594-10648)  | 44.6 (44.4-44.7) | 3629.1 (3610-3650) | 61.6 (61.3-61.9) | 4185.4 (4167-4216)         | 46.9 (46.7-47.2) | 2808.5 (2798-2817) | 32.6 (32.5-32.7) |

<sup>a</sup> Unweighted counts (N). Weighted percentages (%) using inverse probability weighting. Numbers may not add up to 100% due to rounding.

<sup>b</sup> Weighted.

<sup>c</sup> Numbers represent an average among 10 imputed treatment datasets and therefore may not add up to 100%. Weighted using inverse probability weighting.

eTable 2. Model results: Cause-specific cumulative risks by age 30, 40, 50, 60 and 70

| Era                              | Attained Age | Cause-specific risk, % |          |                           |            |                |            |                  |            |              |            |                 |            |                      |           |
|----------------------------------|--------------|------------------------|----------|---------------------------|------------|----------------|------------|------------------|------------|--------------|------------|-----------------|------------|----------------------|-----------|
|                                  |              | Late Recurrence        | 95% UI   | Excess Subsequent Cancers | 95% UI     | Excess Cardiac | 95% UI     | Excess Pulmonary | 95% UI     | Excess Other | 95% UI     | Excess External | 95% UI     | Background Mortality | 95% UI    |
| <b>By treatment era</b>          |              |                        |          |                           |            |                |            |                  |            |              |            |                 |            |                      |           |
| 1970-79                          | 30           | 8.1                    | 7.2-9.0  | 2.4                       | 1.9-2.9    | 0.9            | 0.6-1.2    | 0.5              | 0.2-0.7    | 1.2          | 0.8-1.6    | 0.1             | -0.2-0.5** | 1.5                  | 1.2-1.9   |
|                                  | 40           | 8.9                    | 8.0-9.9  | 4.4                       | 3.8-5.1    | 1.8            | 1.4-2.3    | 0.8              | 0.5-1.1    | 2.3          | 1.7-3.0    | 0.2             | -0.2-0.7** | 3                    | 2.6-3.5   |
|                                  | 50           | 9.3                    | 8.3-10.3 | 7.3                       | 6.4-8.4    | 3.2            | 2.5-3.8    | 1.2              | 0.8-1.7    | 4.1          | 3.2-4.9    | 0.2             | -0.4-0.9** | 6.1                  | 5.4-6.7   |
|                                  | 60           | 9.5                    | 8.5-10.5 | 9.9                       | 8.4-11.4   | 4.4            | 3.4-5.4    | 1.6              | 1.0-2.2    | 5.6          | 4.3-6.8    | 0.2             | -0.6-1.0** | 12.3                 | 11.4-13.2 |
|                                  | 70           | 9.7                    | 8.6-10.7 | 10.9                      | 8.9-12.8   | 4.7            | 3.4-6.0    | 1.4              | 0.6-2.3    | 5.8          | 4.1-7.5    | 0.1             | -0.9-1.1** | 24                   | 22.8-25.1 |
| 1980-89                          | 30           | 5.7                    | 5.0-6.3  | 2.1                       | 1.7-2.5    | 0.6            | 0.4-0.8    | 0.4              | 0.2-0.6    | 1            | 0.7-1.4    | 0.2             | -0.1-0.4** | 1.4                  | 1.2-1.7   |
|                                  | 40           | 6.1                    | 5.5-6.8  | 3.7                       | 3.1-4.3    | 1.2            | 0.8-1.6    | 0.7              | 0.4-1.1    | 1.9          | 1.2-2.5    | 0.3             | -0.1-0.7*  | 2.9                  | 2.5-3.3   |
|                                  | 50           | 6.2                    | 5.6-7.0  | 6                         | 5.0-7.1    | 2              | 1.3-2.8    | 1.2              | 0.6-2.0    | 3            | 1.8-4.0    | 0.4             | -0.2-0.9*  | 5.9                  | 5.4-6.4   |
|                                  | 60           | 6.3                    | 5.6-7.0  | 8                         | 6.6-9.4    | 2.7            | 1.5-4.2    | 1.6              | 0.6-2.8    | 3.8          | 2.2-5.5    | 0.4             | -0.4-1.2** | 12.2                 | 11.4-12.9 |
|                                  | 70           | 6.4                    | 5.7-7.1  | 8.8                       | 7.0-10.7   | 2.8            | 1.2-4.7    | 1.7              | 0.3-3.2    | 3.9          | 1.8-5.9    | 0.4             | -0.6-1.4** | 24                   | 22.9-24.9 |
| 1990-99                          | 30           | 3.9                    | 3.4-4.4  | 1.4                       | 1.0-1.9    | 0.4            | 0.2-0.6    | 0.3              | 0.1-0.5    | 1            | 0.6-1.4    | 0.2             | -0.1-0.5*  | 1.3                  | 1.0-1.7   |
|                                  | 40           | 4.4                    | 3.8-5.0  | 2.8                       | 2.2-3.6    | 0.7            | 0.4-1.1    | 0.5              | 0.2-0.9    | 1.6          | 1.0-2.2    | 0.3             | 0.0-0.7*   | 2.8                  | 2.4-3.3   |
|                                  | 50           | 4.7                    | 4.0-5.4  | 4.5                       | 3.6-5.7    | 1.2            | 0.7-1.9    | 0.9              | 0.3-1.6    | 2.3          | 1.4-3.3    | 0.5             | -0.1-1.0*  | 5.8                  | 5.2-6.5   |
|                                  | 60           | 5                      | 4.2-5.9  | 6                         | 4.6-7.5    | 1.6            | 0.9-2.6    | 1.2              | 0.3-2.3    | 2.9          | 1.6-4.2    | 0.6             | -0.2-1.4*  | 12.1                 | 11.2-13.0 |
|                                  | 70           | 5.2                    | 4.4-6.2  | 6.7                       | 5.0-8.6    | 1.6            | 0.7-3.0    | 1.3              | 0.1-2.7    | 2.8          | 1.2-4.5    | 0.6             | -0.4-1.6** | 23.9                 | 22.8-25.1 |
| <b>No Treatment/Surgery only</b> |              |                        |          |                           |            |                |            |                  |            |              |            |                 |            |                      |           |
| 1970-79                          | 30           | 4.1                    | 1.3-8.0  | 1.1                       | -0.1-2.8** | 0.4            | 0.0-1.5    | 0.6              | 0.0-1.9    | 0.6          | -0.4-2.1** | 0.2             | -1.0-1.3** | 1.5                  | 0.3-3.1   |
|                                  | 40           | 4.5                    | 1.4-8.3  | 1.6                       | -0.1-3.9** | 0.7            | 0.0-2.1    | 0.9              | -0.3-2.4*  | 1.3          | -0.5-3.6*  | 0.3             | -1.1-1.8** | 3                    | 1.1-5.0   |
|                                  | 50           | 4.7                    | 1.5-8.7  | 1.9                       | -0.6-4.7** | 0.9            | -0.1-2.6*  | 1.2              | -0.3-3.1*  | 1.9          | -0.7-5.3*  | 0.5             | -1.2-2.4** | 6                    | 3.3-8.8   |
|                                  | 60           | 4.8                    | 1.5-8.8  | 1.9                       | -1.6-5.7** | 1              | -0.4-3.4*  | 1.6              | -0.6-4.2*  | 2.4          | -1.1-7.3*  | 0.6             | -1.5-3.0** | 12.2                 | 8.5-16.0  |
|                                  | 70           | 4.9                    | 1.5-8.9  | 1.6                       | -2.5-6.1** | 0.9            | -1.1-3.6** | 1.8              | -1.1-5.6** | 2.5          | -1.8-8.7** | 0.7             | -1.7-3.4** | 23.7                 | 18.9-28.5 |
| 1980-89                          | 30           | 2                      | 0.6-3.8  | 1.1                       | 0.1-2.3*   | 0.3            | 0.0-1.0    | 0.4              | -0.1-1.0*  | 0.9          | 0.0-2.2*   | 0.2             | -0.5-1.0** | 1.4                  | 0.6-2.6   |
|                                  | 40           | 2.2                    | 0.7-4.1  | 1.7                       | 0.3-3.4**  | 0.7            | 0.0-1.9    | 0.6              | -0.1-1.5*  | 1.7          | 0.2-3.6    | 0.4             | -0.6-1.6** | 2.9                  | 1.6-4.3   |
|                                  | 50           | 2.2                    | 0.7-4.2  | 2.3                       | 0.1-5.0**  | 1.2            | 0.0-3.0    | 0.8              | -0.2-2.1*  | 2.6          | 0.1-5.2    | 0.6             | -0.8-2.0** | 5.9                  | 4.1-7.8   |
|                                  | 60           | 2.3                    | 0.7-4.2  | 2.6                       | -0.4-6.3** | 1.6            | -0.2-3.9*  | 1.1              | -0.4-2.9*  | 3.3          | -0.1-6.7*  | 0.7             | -1.1-2.5** | 12.1                 | 9.5-14.5  |
|                                  | 70           | 2.3                    | 0.8-4.3  | 2.6                       | -1.5-6.7** | 1.8            | -0.6-4.7** | 1.2              | -1.0-3.6** | 3.6          | -0.8-8.0*  | 0.8             | -1.2-2.9** | 23.9                 | 20.7-27.3 |
| 1990-99                          | 30           | 1.2                    | 0.4-2.3  | 0.8                       | 0.1-1.7    | 0.3            | 0.0-0.9    | 0.4              | 0.0-1.1*   | 1.1          | 0.2-2.3    | 0.2             | -0.3-0.8** | 1.3                  | 0.6-2.1   |
|                                  | 40           | 1.3                    | 0.4-2.4  | 1.6                       | 0.4-3.0    | 0.6            | 0.0-1.6    | 0.6              | -0.1-1.5*  | 1.9          | 0.4-3.5    | 0.4             | -0.4-1.3** | 2.7                  | 1.8-3.8   |
|                                  | 50           | 1.3                    | 0.5-2.4  | 2.4                       | 0.6-4.5    | 1.1            | 0.0-2.5    | 0.8              | -0.1-2.1*  | 2.8          | 0.6-4.9    | 0.6             | -0.6-1.7** | 5.7                  | 4.4-7.3   |
|                                  | 60           | 1.3                    | 0.5-2.4  | 3.1                       | 0.5-5.8    | 1.4            | -0.1-3.5*  | 1.1              | -0.3-2.7*  | 3.5          | 0.7-6.1    | 0.7             | -0.7-2.2** | 11.8                 | 9.9-13.9  |
|                                  | 70           | 1.3                    | 0.5-2.4  | 3.4                       | 0.0-6.7    | 1.5            | -0.4-3.9*  | 1.1              | -0.8-3.1*  | 3.8          | 0.5-7.1    | 0.8             | -0.8-2.6** | 23.4                 | 20.8-26.2 |
| <b>Chemotherapy only</b>         |              |                        |          |                           |            |                |            |                  |            |              |            |                 |            |                      |           |
| 1970-79                          | 30           | 8.2                    | 6.1-10.5 | 1.1                       | 0.3-2.0    | 0.5            | 0.1-1.2    | 0.3              | 0.0-0.8    | 0.8          | 0.0-1.6    | 0.1             | -0.5-0.8** | 1.5                  | 0.8-2.3   |
|                                  | 40           | 8.7                    | 6.5-11.0 | 2                         | 1.0-3.2    | 0.9            | 0.2-1.8    | 0.5              | 0.0-1.2    | 1.3          | 0.2-2.4    | 0.3             | -0.6-1.1** | 3                    | 2.1-4.1   |
|                                  | 50           | 8.9                    | 6.7-11.0 | 3.5                       | 1.8-5.5    | 1.3            | 0.3-2.6    | 0.7              | 0.0-1.6    | 1.9          | 0.3-3.5    | 0.4             | -0.7-1.5** | 6                    | 4.7-7.5   |
|                                  | 60           | 9                      | 6.8-11.2 | 5                         | 2.0-8.4    | 1.6            | 0.2-3.5    | 0.8              | -0.2-2.1*  | 2.3          | -0.1-5.0*  | 0.4             | -0.9-1.9** | 12.3                 | 10.4-14.3 |
|                                  | 70           | 9                      | 6.8-11.2 | 5.7                       | 1.5-10.0   | 1.5            | -0.4-4.2*  | 0.7              | -0.8-2.4*  | 2.1          | -1.0-5.5** | 0.5             | -1.2-2.3** | 24.1                 | 21.5-26.6 |
| 1980-89                          | 30           | 3.6                    | 2.7-4.6  | 1.2                       | 0.7-1.8    | 0.4            | 0.2-0.8    | 0.2              | 0.0-0.6    | 0.6          | 0.2-1.1    | 0.2             | -0.2-0.6** | 1.4                  | 1.0-1.9   |
|                                  | 40           | 3.7                    | 2.8-4.8  | 2.2                       | 1.4-3.3    | 0.7            | 0.3-1.2    | 0.6              | 0.1-1.3    | 1.1          | 0.3-2.0    | 0.4             | -0.2-0.9*  | 2.9                  | 2.1-3.6   |
|                                  | 50           | 3.8                    | 2.8-4.8  | 3.7                       | 1.9-5.5    | 1              | 0.3-2.1    | 1                | 0.1-2.5    | 1.8          | 0.3-3.4    | 0.5             | -0.3-1.3** | 5.8                  | 4.8-6.8   |
|                                  | 60           | 3.8                    | 2.9-4.9  | 4.9                       | 2.1-7.7    | 1.3            | 0.2-2.9    | 1.5              | -0.1-3.5*  | 2.3          | 0.1-4.7    | 0.6             | -0.4-1.7** | 12                   | 10.7-13.3 |
|                                  | 70           | 3.8                    | 2.9-4.9  | 5.4                       | 1.6-9.2    | 1.2            | -0.3-3.3*  | 1.7              | -0.3-4.2*  | 2.3          | -0.5-5.4*  | 0.7             | -0.5-2.1** | 23.7                 | 22.0-25.4 |
| 1990-99                          | 30           | 1.9                    | 1.3-2.5  | 1                         | 0.5-1.5    | 0.3            | 0.1-0.7    | 0.2              | 0.0-0.4*   | 0.6          | 0.1-1.2    | 0.2             | -0.2-0.6** | 1.4                  | 0.9-1.9   |
|                                  | 40           | 1.9                    | 1.3-2.6  | 1.9                       | 1.2-2.9    | 0.6            | 0.2-1.1    | 0.4              | 0.0-0.9    | 1.1          | 0.2-2.1    | 0.4             | -0.1-1.0*  | 2.8                  | 2.2-3.6   |
|                                  | 50           | 1.9                    | 1.3-2.6  | 3.2                       | 1.8-4.9    | 0.9            | 0.2-1.8    | 0.8              | 0.0-1.9    | 1.7          | 0.3-3.2    | 0.6             | -0.1-1.4*  | 5.9                  | 4.9-6.8   |
|                                  | 60           | 2                      | 1.3-2.6  | 4.3                       | 2.2-6.8    | 1.1            | 0.1-2.5    | 1.1              | -0.1-2.8*  | 2.2          | 0.2-4.3    | 0.7             | -0.3-1.8*  | 12.1                 | 10.8-13.5 |
|                                  | 70           | 2                      | 1.4-2.6  | 4.8                       | 2.2-8.1    | 1.1            | -0.2-2.9*  | 1.2              | -0.4-3.6*  | 2.2          | -0.2-4.8*  | 0.8             | -0.4-2.2*  | 24                   | 22.3-25.8 |
| <b>Radiotherapy only</b>         |              |                        |          |                           |            |                |            |                  |            |              |            |                 |            |                      |           |
| 1970-79                          | 30           | 7.7                    | 5.4-10.1 | 3.1                       | 1.7-4.5    | 1              | 0.3-1.8    | 0.6              | 0.1-1.4    | 1            | 0.1-2.2    | 0.1             | -0.7-0.9** | 1.4                  | 0.7-2.3   |
|                                  | 40           | 9.5                    | 7.2-12.3 | 5.9                       | 3.8-7.9    | 2.2            | 1.0-3.5    | 1.4              | 0.6-2.4    | 2.7          | 1.1-4.3    | 0.2             | -0.9-1.3** | 2.9                  | 1.8-4.2   |
|                                  | 50           | 10.3                   | 7.9-13.2 | 9.4                       | 6.4-12.3   | 4              | 2.2-5.9    | 2.6              | 1.4-4.2    | 5.9          | 3.5-8.4    | 0.2             | -1.2-1.4** | 6                    | 4.5-7.6   |
|                                  | 60           | 10.8                   | 8.4-13.7 | 12.2                      | 8.3-16.0   | 5.9            | 2.9-8.6    | 3.7              | 1.8-6.0    | 9.5          | 5.8-13.3   | 0               | -1.6-1.6** | 12.2                 | 10.0-14.2 |
|                                  | 70           | 11.2                   | 8.7-14.1 | 12.7                      | 7.8-17.6   | 6.3            | 2.5-9.9    | 4.1              | 1.4-7.0    | 10.9         | 6.2-15.6   | -0.2            | -2.0-1.5** | 23.8                 | 20.9-26.7 |
| 1990-99                          | 30           | 7.5                    | 5.3-9.9  | 2.4                       | 1.1-3.7    | 0.8            | 0.2-1.6    | 0.6              | 0.1-1.3    | 1.4          | 0.4-2.6    | 0.1             | -0.7-0.9** | 1.3                  | 0.6-2.1   |
|                                  | 40           | 9.2                    | 6.6-12.0 | 4.9                       | 2.9-6.9    | 1.7            | 0.7-3.0    | 1.1              | 0.3-2.0    | 3.3          | 1.7-5.3    | 0.2             | -0.9-1.2** | 2.7                  | 1.7-3.9   |

|                                     |      |          |          |           |          |           |         |            |            |           |          |            |            |           |           |
|-------------------------------------|------|----------|----------|-----------|----------|-----------|---------|------------|------------|-----------|----------|------------|------------|-----------|-----------|
| 1980-89                             | 50   | 9.9      | 7.1-13.0 | 8.2       | 4.6-11.8 | 3.3       | 1.2-5.5 | 1.7        | 0.5-3.1    | 6.3       | 3.4-9.6  | 0.2        | -1.2-1.5** | 5.8       | 4.3-7.4   |
|                                     | 60   | 10.3     | 7.4-13.7 | 10.9      | 5.7-16.0 | 4.8       | 1.3-8.0 | 2.3        | 0.5-4.5    | 9.1       | 4.6-13.6 | 0.1        | -1.5-1.7** | 12        | 9.9-14.2  |
|                                     | 70   | 10.7     | 7.8-14.2 | 11.5      | 4.7-17.7 | 5.1       | 0.5-9.2 | 2.2        | -0.1-5.1*  | 10.1      | 4.9-15.5 | -0.1       | -2.0-1.8** | 23.8      | 20.7-26.7 |
| 1990-99                             | 30   | 7.3      | 3.9-11.1 | 1.7       | 0.2-3.6  | 0.8       | 0.0-2.1 | 0.5        | 0.0-1.7    | 3.2       | 1.0-5.6  | 0.1        | -1.1-1.4** | 1.2       | 0.3-2.6   |
|                                     | 40   | 8.4      | 4.8-12.5 | 3.9       | 1.4-6.9  | 1.4       | 0.0-3.2 | 1          | 0.0-2.7    | 5.3       | 2.2-8.4  | 0.2        | -1.5-2.0** | 2.7       | 1.1-4.6   |
|                                     | 50   | 8.6      | 4.9-12.9 | 6.9       | 2.9-11.4 | 2.5       | 0.3-5.0 | 1.6        | 0.0-3.9    | 7.9       | 4.1-12.0 | 0.2        | -2.0-2.4** | 5.6       | 3.1-8.2   |
|                                     | 60   | 8.8      | 5.0-13.1 | 9.3       | 3.3-15.3 | 3.5       | 0.2-6.9 | 2          | -0.2-5.0*  | 10.1      | 5.7-1.4  | 0.2        | -2.4-2.8** | 11.8      | 8.3-15.5  |
| 70                                  | 8.9  | 5.1-13.3 | 10       | 2.7-17.7  | 3.5      | -0.6-7.9* | 2       | -0.9-5.6*  | 10.9       | 5.0-17.2  | 0.1      | -2.7-3.1** | 23.6       | 18.9-28.0 |           |
| <b>Chemoradiotherapy</b>            |      |          |          |           |          |           |         |            |            |           |          |            |            |           |           |
| 1970-79                             | 30   | 8.5      | 7.4-9.7  | 2.7       | 2.1-3.4  | 1         | 0.7-1.5 | 0.4        | 0.1-0.8    | 1.4       | 0.8-1.9  | 0.1        | -0.3-0.5** | 1.6       | 1.1-2.0   |
|                                     | 40   | 9.2      | 8.0-10.4 | 5         | 4.1-5.8  | 2.1       | 1.5-2.7 | 0.7        | 0.3-1.1    | 2.7       | 1.8-3.5  | 0.2        | -0.4-0.8** | 3.1       | 2.6-3.6   |
|                                     | 50   | 9.6      | 8.2-10.8 | 8.4       | 7.2-9.8  | 3.8       | 2.8-4.7 | 1.1        | 0.5-1.6    | 4.5       | 3.1-5.6  | 0.2        | -0.6-1.0** | 6.1       | 5.3-6.8   |
|                                     | 60   | 9.8      | 8.4-11.0 | 11.5      | 9.7-13.5 | 5.2       | 3.7-6.6 | 1.2        | 0.5-2.0    | 5.9       | 4.0-7.6  | 0.1        | -0.8-1.1** | 12.3      | 11.2-13.4 |
| 70                                  | 10   | 8.6-11.2 | 12.8     | 10.2-15.5 | 5.6      | 3.7-7.3   | 1       | 0.0-2.0*   | 6          | 3.8-8.1   | 0        | -1.1-1.2** | 24.1       | 22.6-25.5 |           |
| 1980-89                             | 30   | 7.5      | 6.4-8.6  | 2.9       | 2.2-3.7  | 0.7       | 0.4-1.1 | 0.4        | 0.2-0.8    | 1.3       | 0.8-1.9  | 0.1        | -0.3-0.5** | 1.5       | 1.1-1.9   |
|                                     | 40   | 8        | 6.9-9.1  | 5         | 4.0-6.0  | 1.5       | 0.9-2.2 | 0.8        | 0.4-1.4    | 2.2       | 1.3-3.1  | 0.2        | -0.4-0.7** | 2.9       | 2.4-3.5   |
|                                     | 50   | 8.1      | 7.0-9.2  | 8         | 6.6-9.7  | 2.7       | 1.6-4.0 | 1.3        | 0.4-2.4    | 3.3       | 1.6-4.7  | 0.2        | -0.5-1.0** | 6         | 5.3-6.8   |
|                                     | 60   | 8.1      | 7.0-9.3  | 10.7      | 8.7-13.1 | 3.6       | 1.9-5.9 | 1.7        | 0.2-3.2    | 4.1       | 1.5-6.4  | 0.2        | -0.7-1.1** | 12.3      | 11.3-13.4 |
| 70                                  | 8.2  | 7.0-9.4  | 11.9     | 9.3-14.9  | 3.8      | 1.5-6.8   | 1.7     | -3.9       | 3.9        | 0.6-6.8   | 0.1      | -1.0-1.2** | 24.2       | 22.9-25.6 |           |
| 1990-99                             | 30   | 7.8      | 6.5-9.3  | 2.4       | 1.4-3.5  | 0.4       | 0.0-0.9 | 0.3        | 0.0-0.7    | 1.2       | 0.6-1.9  | 0.1        | -0.3-0.6** | 1.3       | 0.8-1.8   |
|                                     | 40   | 9        | 7.4-10.7 | 4.4       | 2.8-6.5  | 1         | 0.2-1.8 | 0.7        | 0.1-1.3    | 1.9       | 1.0-2.8  | 0.2        | -0.4-0.8** | 2.8       | 2.1-3.5   |
|                                     | 50   | 10       | 8.1-12.2 | 7.1       | 5.0-9.8  | 1.8       | 0.6-2.9 | 1.1        | 0.2-2.1    | 2.6       | 1.2-3.9  | 0.2        | -0.6-1.0** | 5.8       | 4.8-6.9   |
|                                     | 60   | 10.8     | 8.8-13.4 | 9.5       | 6.8-12.7 | 2.3       | 0.6-4.0 | 1.4        | 0.1-2.8    | 3.1       | 1.0-5.0  | 0.2        | -0.8-1.4** | 12.1      | 10.8-13.6 |
| 70                                  | 11.5 | 9.1-14.4 | 10.6     | 7.4-14.1  | 2.3      | 0.0-4.4   | 1.4     | -0.3-3.1*  | 2.7        | 0.0-5.1   | 0.2      | -1.0-1.4** | 23.9       | 22.1-25.7 |           |
| <b>Acute Lymphoblastic Leukemia</b> |      |          |          |           |          |           |         |            |            |           |          |            |            |           |           |
| 1970-79                             | 30   | 10.8     | 8.9-12.8 | 1.5       | 0.8-2.3  | 0.7       | 0.3-1.3 | 0.4        | 0.1-0.9    | 1.1       | 0.5-1.9  | -0.1       | -0.7-0.6** | 1.6       | 1.0-2.2   |
|                                     | 40   | 10.9     | 9.0-12.8 | 2.7       | 1.8-3.7  | 1.1       | 0.5-1.8 | 0.6        | 0.1-1.2    | 1.8       | 1.0-2.8  | -0.1       | -0.9-0.7** | 3.1       | 2.3-4.0   |
|                                     | 50   | 10.9     | 9.0-12.9 | 5         | 3.2-6.7  | 1.8       | 0.8-3.0 | 0.7        | 0.1-1.4    | 3.1       | 1.7-4.8  | 0          | -1.1-1.2** | 6.1       | 5.0-7.3   |
|                                     | 60   | 10.9     | 9.0-12.9 | 6.8       | 4.2-9.5  | 2.3       | 0.8-4.0 | 0.7        | -0.1-1.6** | 4.1       | 2.0-6.5  | 0.1        | -1.4-2.6** | 12.2      | 10.7-13.8 |
| 70                                  | 10.9 | 9.0-12.9 | 7.6      | 4.1-11.0  | 2.3      | 0.3-4.6   | 0.4     | -0.7-1.6** | 4.3        | 1.7-7.3   | 0.1      | -1.7-0.6** | 23.9       | 22.0-25.9 |           |
| 1980-89                             | 30   | 5.5      | 4.0-7.2  | 2.2       | 1.4-3.1  | 0.3       | 0.1-0.7 | 0.4        | 0.1-0.8    | 0.7       | 0.2-1.3  | 0          | -0.4-0.7** | 1.5       | 1.0-2.1   |
|                                     | 40   | 5.6      | 4.1-7.2  | 3.6       | 2.4-4.8  | 0.7       | 0.2-1.3 | 0.7        | 0.3-1.4    | 1.3       | 0.5-2.2  | 0          | -0.7-0.7** | 3         | 2.2-3.7   |
|                                     | 50   | 5.6      | 4.1-7.2  | 5.6       | 3.6-7.6  | 1.3       | 0.4-2.3 | 1.1        | 0.3-2.2    | 2.4       | 0.8-4.3  | 0.1        | -0.9-1.5** | 6         | 5.0-7.0   |
|                                     | 60   | 5.6      | 4.1-7.2  | 7.2       | 4.6-10.3 | 1.8       | 0.5-3.3 | 1.4        | 0.2-3.0    | 3.3       | 0.8-6.1  | 0.3        | -1.2-2.3** | 12.2      | 10.7-13.6 |
| 70                                  | 5.6  | 4.1-7.2  | 8        | 4.8-11.7  | 1.7      | 0.1-3.6   | 1.4     | -0.3-3.4*  | 3.5        | 0.4-7.1   | 0.4      | -1.5-3.1** | 24         | 22.0-25.9 |           |
| 1990-99                             | 30   | 2.3      | 1.3-3.6  | 1.5       | 0.6-2.6  | 0.4       | 0.0-0.9 | 0.4        | 0.0-0.9    | 0.7       | 0.1-1.4  | 0.1        | -0.5-0.6** | 1.4       | 0.7-2.2   |
|                                     | 40   | 2.3      | 1.3-3.7  | 3         | 1.4-4.9  | 0.8       | 0.1-1.7 | 0.8        | 0.1-1.7    | 1.2       | 0.2-2.4  | 0          | -0.8-0.9** | 2.9       | 2.0-3.9   |
|                                     | 50   | 2.3      | 1.3-3.7  | 4.8       | 2.5-7.4  | 1.3       | 0.3-2.5 | 1.2        | 0.3-2.5    | 2.1       | 0.3-3.9  | 0.3        | -1.1-1.8** | 5.9       | 4.6-7.3   |
|                                     | 60   | 2.3      | 1.3-3.7  | 6.3       | 3.4-10.0 | 1.8       | 0.4-3.3 | 1.6        | 0.2-3.2    | 2.7       | 0.3-5.5  | 0.5        | -1.3-2.8** | 12.2      | 10.4-14.1 |
| 70                                  | 2.3  | 1.3-3.7  | 7.1      | 3.2-11.5  | 1.8      | 0.2-3.7   | 1.7     | 0.0-3.7    | 2.8        | -0.1-6.2* | 0.6      | -1.5-3.7** | 24         | 21.6-26.5 |           |

\* Value was negative in <100 of 950 simulations that comprised the 95% UI.

\*\* Value was negative in 100 to 550 of 950 simulations that comprised the 95% UI.

*Observed changes in median therapeutic exposures among the treatment and ALL subgroups*

Projected changes in life expectancy gap among treatment subgroups were generally consistent with observed changes in therapeutic exposures within subgroups. For the chemotherapy alone subgroup, the median cumulative anthracycline dosage (400 to 173 mg/m<sup>2</sup>) and cyclophosphamide equivalent dose (CED) (8,422 to 6217 mg/m<sup>2</sup>) declined by approximately 30-60% between 1970-79 and 1990-99 (eTable 3). In contrast, median doses for chest (40 to 36 Gy), brain (50 to 54 Gy) and abdominal radiation (37 to 36 Gy) remained largely unchanged for the radiation alone subgroup (eTable 4). For the radiation with chemotherapy subgroup, median cumulative anthracycline dose (294 to 193 mg/m<sup>2</sup>) and chest (30 to 23 Gy) and abdominal radiation doses (30 to 20 Gy) declined, yet brain radiation dose increased (24 to 38 Gy) (eTable 5). For the ALL subgroup, cumulative anthracycline (281 to 108 mg/m<sup>2</sup>), CED dose (6,653 to 3,860 mg/m<sup>2</sup>) and radiation dose (22 to 13 Gy chest, 24 to 18 Gy brain, 22 to 13 Gy abdominal) also declined (eTable 6).

**eTable 3. Patient Characteristics and Therapeutic Exposures: Chemotherapy Alone Subgroup**

| Characteristic <sup>a</sup>                               | Overall     |      | Treatment Era |      |             |      |             |      |  |  |
|-----------------------------------------------------------|-------------|------|---------------|------|-------------|------|-------------|------|--|--|
|                                                           | 1970-1999   |      | 1970-1979     |      | 1980-1989   |      | 1990-1999   |      |  |  |
|                                                           | N           | %    | N             | %    | N           | %    | N           | %    |  |  |
| Participants                                              | 7607        | 100  | 1048          | 11   | 3095        | 33.8 | 3464        | 55.2 |  |  |
| <i>Sex</i>                                                |             |      |               |      |             |      |             |      |  |  |
| Male                                                      | 4028        | 55.1 | 555           | 55.2 | 1595        | 53.5 | 1878        | 56.1 |  |  |
| Female                                                    | 3580        | 44.9 | 493           | 44.8 | 1500        | 46.5 | 1586        | 43.9 |  |  |
| <i>Age at diagnosis, years</i>                            |             |      |               |      |             |      |             |      |  |  |
| 0 to 4                                                    | 3499        | 49.9 | 437           | 41.6 | 1551        | 51.6 | 1512        | 50.6 |  |  |
| 5 to 9                                                    | 1566        | 23.3 | 197           | 18.8 | 635         | 22   | 733         | 24.9 |  |  |
| 10 to 14                                                  | 1481        | 15.8 | 216           | 20.5 | 522         | 15.2 | 743         | 15.3 |  |  |
| 15 to 19                                                  | 1061        | 11   | 198           | 19   | 387         | 11.3 | 476         | 9.2  |  |  |
| Mean (Range)                                              | 6.3 (0-20)  |      | 7.8 (0-20)    |      | 6.2 (0-20)  |      | 6.1 (0-20)  |      |  |  |
| <i>Follow-up (years since diagnosis)<sup>b</sup></i>      |             |      |               |      |             |      |             |      |  |  |
| Mean (Range)                                              | 19.0 (5-39) |      | 28.1 (5-39)   |      | 21.5 (5-29) |      | 15.7 (5-24) |      |  |  |
| <i>Attained age<sup>b</sup></i>                           |             |      |               |      |             |      |             |      |  |  |
| Mean (Range)                                              | 25.4 (5-57) |      | 35.8 (5-57)   |      | 27.7 (6-49) |      | 21.8 (6-41) |      |  |  |
| <i>Diagnosis</i>                                          |             |      |               |      |             |      |             |      |  |  |
| Leukemia                                                  | 3143        | 54.3 | 379           | 37.6 | 1416        | 51.6 | 1348        | 59.7 |  |  |
| Acute Lymphoblastic Leukemia                              | 2496        | 47.5 | 287           | 28.4 | 1198        | 45.1 | 1011        | 53.2 |  |  |
| Acute Myeloid Leukemia                                    | 533         | 5.4  | 67            | 5.9  | 184         | 5.3  | 282         | 5.3  |  |  |
| Other Leukemia                                            | 114         | 1.4  | 26            | 3.3  | 34          | 1.1  | 55          | 1.3  |  |  |
| Hodgkin Lymphoma                                          | 343         | 3.5  | 54            | 4.2  | 110         | 3.2  | 179         | 3.4  |  |  |
| Non-Hodgkin Lymphoma                                      | 986         | 10   | 78            | 6.7  | 347         | 9.9  | 562         | 10.5 |  |  |
| Central nervous system tumor                              | 325         | 3.6  | 5             | 0.9  | 63          | 1.9  | 257         | 5.2  |  |  |
| Astrocytoma                                               | 239         | 2.7  | 5             | 0.6  | 43          | 1.3  | 191         | 3.9  |  |  |
| Medulloblastoma or PNET                                   | 48          | 0.5  | 0             | 0.2  | 12          | 0.3  | 36          | 0.7  |  |  |
| Other                                                     | 38          | 0.4  | 0             | 0.1  | 8           | 0.3  | 30          | 0.6  |  |  |
| Wilms Tumor                                               | 856         | 8.5  | 114           | 10.9 | 394         | 11.1 | 348         | 6.4  |  |  |
| Neuroblastoma                                             | 555         | 5.6  | 84            | 8    | 228         | 6.5  | 243         | 4.6  |  |  |
| Rhabdomyosarcoma                                          | 237         | 2.5  | 57            | 5.4  | 87          | 2.6  | 93          | 1.8  |  |  |
| Bone Tumor                                                | 1162        | 12.1 | 277           | 26.2 | 451         | 13.2 | 434         | 8.4  |  |  |
| Ewing sarcoma                                             | 203         | 2.1  | 23            | 2.2  | 79          | 2.3  | 101         | 1.9  |  |  |
| Osteosarcoma                                              | 943         | 9.8  | 253           | 23.8 | 371         | 10.9 | 319         | 6.2  |  |  |
| Other                                                     | 16          | 0.2  | 1             | 0.2  | 1           | 0    | 14          | 0.3  |  |  |
| <i>Treatment Exposures<sup>c</sup></i>                    |             |      |               |      |             |      |             |      |  |  |
| <i>Anthracycline Dose, mg/m<sup>2</sup></i>               |             |      |               |      |             |      |             |      |  |  |
| None                                                      | 2903        | 35   | 538           | 51   | 1441        | 45.5 | 925         | 25.3 |  |  |
| 0 to <150                                                 | 1544        | 27.7 | 42            | 4.1  | 424         | 16.6 | 1078        | 39.3 |  |  |
| 150 to <300                                               | 1472        | 19.3 | 100           | 9.6  | 485         | 15.1 | 887         | 23.8 |  |  |
| 300 to <450                                               | 1218        | 13   | 185           | 17.8 | 577         | 17.8 | 456         | 9.1  |  |  |
| 450 to <600                                               | 385         | 4.1  | 159           | 15   | 131         | 3.9  | 95          | 2    |  |  |
| 600+                                                      | 72          | 0.8  | 25            | 2.5  | 34          | 1.1  | 12          | 0.3  |  |  |
| Median dose <sup>d</sup>                                  | 218         |      | 400           |      | 277         |      | 173         |      |  |  |
| <i>Cyclophosphamide Equivalent Dose, mg/m<sup>2</sup></i> |             |      |               |      |             |      |             |      |  |  |
| None                                                      | 2968        | 40.5 | 451           | 42.6 | 1270        | 42.9 | 1247        | 38.5 |  |  |
| 0 to <4,000                                               | 1519        | 23.9 | 120           | 11.7 | 664         | 21.8 | 735         | 27.7 |  |  |
| 4,000 to <8,000                                           | 1418        | 15.8 | 171           | 16.2 | 576         | 17.4 | 671         | 14.8 |  |  |
| 8,000 to <12,000                                          | 850         | 10.7 | 98            | 9.4  | 316         | 9.7  | 436         | 11.7 |  |  |
| 12,000 to <16,000                                         | 336         | 3.6  | 64            | 6    | 132         | 4.1  | 139         | 2.7  |  |  |
| 16,000 to <20,000                                         | 200         | 2.1  | 49            | 4.7  | 84          | 2.5  | 68          | 1.4  |  |  |
| 20,000+                                                   | 317         | 3.4  | 96            | 9.5  | 53          | 1.6  | 167         | 3.2  |  |  |
| Median dose <sup>d</sup>                                  | 6153        |      | 8422          |      | 5745        |      | 6217        |      |  |  |

<sup>a</sup> Unweighted counts (N). Weighted percentages (%) using inverse probability weighting. Numbers may not add up to 100% due to rounding.

<sup>b</sup> Weighted.

<sup>c</sup> Numbers represent an average among 10 imputed treatment datasets and therefore may not add up to 100%.

<sup>d</sup> Median dose is weighted and calculated among those with dose >0.

**eTable 4. Patient Characteristics and Therapeutic Exposures: Radiotherapy Alone Subgroup**

| Characteristic <sup>a</sup>                          | Overall     |      | Treatment Era |      |             |      |             |      |
|------------------------------------------------------|-------------|------|---------------|------|-------------|------|-------------|------|
|                                                      | 1970-1999   |      | 1970-1979     |      | 1980-1989   |      | 1990-1999   |      |
|                                                      | N           | %    | N             | %    | N           | %    | N           | %    |
| Participants                                         | 2010        | 100  | 840           | 42.9 | 841         | 40.7 | 329         | 16.5 |
| <i>Sex</i>                                           |             |      |               |      |             |      |             |      |
| Male                                                 | 1059        | 54.8 | 441           | 54.8 | 448         | 55.3 | 170         | 53.4 |
| Female                                               | 951         | 45.2 | 399           | 45.2 | 393         | 44.7 | 160         | 46.6 |
| <i>Age at diagnosis, years</i>                       |             |      |               |      |             |      |             |      |
| 0 to 4                                               | 457         | 23   | 173           | 20.5 | 217         | 26.6 | 67          | 20.5 |
| 5 to 9                                               | 431         | 21.6 | 154           | 18.6 | 177         | 21.2 | 100         | 30.3 |
| 10 to 14                                             | 505         | 25   | 209           | 24.9 | 204         | 23.8 | 92          | 28.3 |
| 15 to 19                                             | 617         | 30.4 | 303           | 35.9 | 244         | 28.4 | 70          | 20.9 |
| Mean (Range)                                         | 10.3 (0-20) |      | 10.9 (0-20)   |      | 9.9 (0-20)  |      | 9.6 (0-20)  |      |
| <i>Follow-up (years since diagnosis)<sup>b</sup></i> |             |      |               |      |             |      |             |      |
| Mean (Range)                                         | 23.5 (5-39) |      | 28.4 (5-39)   |      | 21.4 (5-29) |      | 16 (5-23)   |      |
| <i>Attained age<sup>b</sup></i>                      |             |      |               |      |             |      |             |      |
| Mean (Range)                                         | 33.8 (5-58) |      | 39.3 (5-58)   |      | 31.3 (7-47) |      | 25.6 (8-40) |      |
| <i>Diagnosis</i>                                     |             |      |               |      |             |      |             |      |
| Leukemia                                             | 4           | 0.3  | 1             | 0.1  | 3           | 0.6  | 0           | 0    |
| Acute Lymphoblastic Leukemia                         | 4           | 0.3  | 1             | 0.1  | 3           | 0.6  | 0           | 0    |
| Acute Myeloid Leukemia                               | 0           | 0    | 0             | 0    | 0           | 0    | 0           | 0    |
| Other Leukemia                                       | 0           | 0    | 0             | 0    | 0           | 0    | 0           | 0    |
| Hodgkin Lymphoma                                     | 725         | 35.2 | 401           | 47   | 285         | 32.6 | 40          | 11.2 |
| Non-Hodgkin Lymphoma                                 | 33          | 1.7  | 25            | 3    | 8           | 0.9  | 0           | 0    |
| Central nervous system tumor                         | 1105        | 55.9 | 324           | 39.8 | 495         | 60.1 | 286         | 87.6 |
| Astrocytoma                                          | 721         | 37.3 | 235           | 29.2 | 322         | 39.9 | 164         | 51.8 |
| Medulloblastoma or PNET                              | 194         | 9.1  | 52            | 6.1  | 98          | 11.1 | 43          | 12   |
| Other                                                | 190         | 9.6  | 37            | 4.5  | 75          | 9.1  | 79          | 23.8 |
| Wilms Tumor                                          | 3           | 0.2  | 2             | 0.3  | 0           | 0    | 1           | 0.3  |
| Neuroblastoma                                        | 120         | 5.7  | 74            | 8.3  | 45          | 5.2  | 1           | 0.4  |
| Rhabdomyosarcoma                                     | 6           | 0.3  | 5             | 0.5  | 1           | 0.1  | 0           | 0.1  |
| Bone Tumor                                           | 13          | 0.7  | 8             | 1    | 4           | 0.4  | 1           | 0.4  |
| Ewing sarcoma                                        | 2           | 0.1  | 1             | 0.1  | 1           | 0.1  | 0           | 0    |
| Osteosarcoma                                         | 11          | 0.6  | 7             | 0.9  | 3           | 0.3  | 1           | 0.4  |
| Other                                                | 0           | 0    | 0             | 0    | 0           | 0    | 0           | 0    |
| <i>Treatment Exposures<sup>c</sup></i>               |             |      |               |      |             |      |             |      |
| <i>Chest Radiation</i>                               |             |      |               |      |             |      |             |      |
| Yes                                                  | 957         | 46.3 | 467           | 54.7 | 396         | 45.3 | 94          | 26.8 |
| No                                                   | 901         | 45.7 | 308           | 37.2 | 370         | 45.5 | 223         | 68.6 |
| Missing                                              | 151         | 8    | 64            | 8.1  | 74          | 9.2  | 13          | 4.6  |
| <i>Chest Radiation Dose, Gy<sup>e</sup></i>          |             |      |               |      |             |      |             |      |
| None                                                 | 901         | 45.7 | 308           | 37.2 | 370         | 45.5 | 223         | 68.6 |
| 0 to <20                                             | 42          | 2.1  | 24            | 2.7  | 19          | 2.2  | 0           | 0    |
| 20 to <30                                            | 76          | 3.6  | 32            | 3.8  | 39          | 4.4  | 4           | 1.2  |
| 30+                                                  | 839         | 40.7 | 411           | 48.2 | 338         | 38.8 | 90          | 25.6 |
| Median dose <sup>d</sup>                             | 39          |      | 40            |      | 38          |      | 36          |      |
| <i>Brain Radiation</i>                               |             |      |               |      |             |      |             |      |
| Yes                                                  | 1074        | 54.3 | 323           | 39.6 | 482         | 58.6 | 269         | 82.1 |
| No                                                   | 828         | 40.4 | 451           | 52.8 | 317         | 36.6 | 59          | 17.7 |
| Missing                                              | 107         | 5.3  | 65            | 7.6  | 42          | 4.8  | 1           | 0.2  |
| <i>Brain Radiation Dose, Gy<sup>e</sup></i>          |             |      |               |      |             |      |             |      |
| None                                                 | 828         | 40.4 | 451           | 52.8 | 317         | 36.6 | 59          | 17.7 |
| 0 to <20                                             | 20          | 1.1  | 8             | 0.9  | 6           | 1    | 6           | 1.8  |
| 20 to <30                                            | 12          | 0.6  | 4             | 0.4  | 3           | 0.3  | 6           | 1.8  |
| 30 to <40                                            | 24          | 1.1  | 11            | 1.2  | 4           | 0.4  | 9           | 2.7  |
| 40 to <50                                            | 136         | 6.8  | 68            | 8.1  | 58          | 6.9  | 10          | 3.2  |
| 50+                                                  | 883         | 44.7 | 232           | 29   | 411         | 49.9 | 239         | 72.6 |
| Median dose <sup>d</sup>                             | 54          |      | 50            |      | 54          |      | 54          |      |
| <i>Abdominal Radiation</i>                           |             |      |               |      |             |      |             |      |
| Yes                                                  | 789         | 38.1 | 370           | 43.3 | 323         | 37.1 | 96          | 27.4 |
| No                                                   | 1070        | 53.9 | 405           | 48.6 | 444         | 53.7 | 221         | 68   |
| Missing                                              | 151         | 8    | 64            | 8.1  | 74          | 9.2  | 13          | 4.6  |
| <i>Abdominal Radiation Dose, Gy<sup>e</sup></i>      |             |      |               |      |             |      |             |      |
| None                                                 | 1070        | 53.9 | 405           | 48.6 | 444         | 53.7 | 221         | 68   |
| 0 to <20                                             | 44          | 2.2  | 27            | 3.2  | 15          | 1.8  | 2           | 0.6  |
| 20 to <30                                            | 65          | 3.1  | 26            | 2.9  | 36          | 4.1  | 3           | 1    |
| 30+                                                  | 679         | 32.9 | 317           | 37.3 | 272         | 31.2 | 90          | 25.8 |
| Median dose <sup>d</sup>                             | 36          |      | 37            |      | 36          |      | 36          |      |

<sup>a</sup> Unweighted counts (N). Weighted percentages (%) using inverse probability weighting. Numbers may not add up to 100% due to rounding.

<sup>b</sup> Weighted.

<sup>c</sup> Numbers represent an average among 10 imputed treatment datasets and therefore may not add up to 100%.

<sup>d</sup> Median dose is weighted and calculated among those with dose >0.

<sup>e</sup> Chest, brain, and abdominal doses are the maximum tumor dose to the respective regions, taken as the sum of the prescribed dose to all overlapping fields within each region.

**eTable 5. Patient Characteristics and Therapeutic Exposures: Chemoradiotherapy Subgroup**

| Characteristic <sup>a</sup>                          | Overall   |        | Treatment Era |           |           |        |      |        |
|------------------------------------------------------|-----------|--------|---------------|-----------|-----------|--------|------|--------|
|                                                      | 1970-1999 |        | 1970-1979     | 1980-1989 | 1990-1999 |        |      |        |
|                                                      | N         | %      | N             | %         | N         | %      |      |        |
| Participants                                         | 10623     | 100    | 3629          | 32.6      | 4185      | 37.9   | 2809 | 29.5   |
| <i>Sex</i>                                           |           |        |               |           |           |        |      |        |
| Male                                                 | 5825      | 57.3   | 1949          | 56.1      | 2373      | 58.7   | 1503 | 57     |
| Female                                               | 4798      | 42.7   | 1680          | 43.9      | 1812      | 41.3   | 1306 | 43     |
| <i>Age at diagnosis, years</i>                       |           |        |               |           |           |        |      |        |
| 0 to 4                                               | 3993      | 38.7   | 1470          | 40.4      | 1622      | 40.2   | 901  | 35     |
| 5 to 9                                               | 2552      | 24.6   | 921           | 25.4      | 982       | 23.8   | 649  | 24.8   |
| 10 to 14                                             | 2311      | 20.9   | 709           | 19.4      | 928       | 21.1   | 674  | 22.1   |
| 15 to 19                                             | 1768      | 15.7   | 529           | 14.8      | 654       | 14.8   | 584  | 18.1   |
| Mean (Range)                                         | 7.7       | (0-20) | 7.5           | (0-20)    | 7.6       | (0-20) | 8.2  | (0-20) |
| <i>Follow-up (years since diagnosis)<sup>b</sup></i> |           |        |               |           |           |        |      |        |
| Mean (Range)                                         | 21.3      | (5-39) | 27.2          | (5-39)    | 20.9      | (5-30) | 15.5 | (5-24) |
| <i>Attained age<sup>b</sup></i>                      |           |        |               |           |           |        |      |        |
| Mean (Range)                                         | 29.1      | (5-57) | 34.7          | (5-57)    | 28.4      | (5-48) | 23.6 | (6-42) |
| <i>Diagnosis</i>                                     |           |        |               |           |           |        |      |        |
| Leukemia                                             | 3753      | 38.7   | 1537          | 41.2      | 1668      | 42.8   | 549  | 30.6   |
| Acute Lymphoblastic Leukemia                         | 3290      | 34.3   | 1437          | 38.2      | 1471      | 38.1   | 382  | 25.2   |
| Acute Myeloid Leukemia                               | 294       | 2.5    | 61            | 1.6       | 133       | 2.9    | 101  | 3      |
| Other Leukemia                                       | 169       | 1.8    | 39            | 1.4       | 64        | 1.7    | 66   | 2.4    |
| Hodgkin Lymphoma                                     | 1803      | 16     | 598           | 16.9      | 615       | 13.9   | 591  | 17.7   |
| Non-Hodgkin Lymphoma                                 | 800       | 7.1    | 322           | 9         | 377       | 8.6    | 102  | 3.1    |
| Central nervous system tumor                         | 1210      | 11.1   | 135           | 3.9       | 443       | 10.4   | 632  | 19.8   |
| Astrocytoma                                          | 379       | 3.7    | 60            | 1.8       | 172       | 4.3    | 148  | 4.9    |
| Medulloblastoma or PNET                              | 653       | 5.8    | 59            | 1.6       | 205       | 4.6    | 389  | 11.9   |
| Other                                                | 178       | 1.7    | 17            | 0.5       | 67        | 1.6    | 95   | 3.1    |
| Wilms Tumor                                          | 1139      | 10     | 369           | 10.2      | 418       | 9.3    | 351  | 10.6   |
| Neuroblastoma                                        | 494       | 4.5    | 171           | 4.8       | 137       | 3.2    | 186  | 5.8    |
| Rhabdomyosarcoma                                     | 840       | 7.6    | 285           | 8.1       | 315       | 7.1    | 240  | 7.5    |
| Bone Tumor                                           | 583       | 5.2    | 212           | 5.9       | 213       | 4.8    | 158  | 4.9    |
| Ewing sarcoma                                        | 466       | 4      | 163           | 4.4       | 182       | 4      | 121  | 3.7    |
| Osteosarcoma                                         | 91        | 0.9    | 49            | 1.5       | 29        | 0.7    | 14   | 0.4    |
| Other                                                | 27        | 0.3    | 1             | 0         | 3         | 0.1    | 23   | 0.8    |
| <i>Treatment Exposures<sup>c</sup></i>               |           |        |               |           |           |        |      |        |
| <i>Chest Radiation</i>                               |           |        |               |           |           |        |      |        |
| Yes                                                  | 4518      | 41.8   | 1365          | 38        | 1639      | 38.4   | 1514 | 50.4   |
| No                                                   | 5545      | 52.8   | 2020          | 55.1      | 2283      | 55.3   | 1242 | 47.1   |
| Missing                                              | 560       | 5.4    | 245           | 6.9       | 264       | 6.3    | 52   | 2.5    |
| <i>Chest Radiation Dose, Gy<sup>e</sup></i>          |           |        |               |           |           |        |      |        |
| None                                                 | 5545      | 52.8   | 2020          | 55.1      | 2283      | 55.3   | 1242 | 47.1   |
| 0 to <20                                             | 1452      | 14.6   | 288           | 8         | 634       | 15.7   | 530  | 20.6   |
| 20 to <30                                            | 1373      | 12     | 382           | 10.4      | 425       | 9.5    | 566  | 16.9   |
| 30+                                                  | 1693      | 15.2   | 695           | 19.5      | 580       | 13.3   | 418  | 12.9   |
| Median dose <sup>d</sup>                             | 24        |        | 30            |           | 21        |        | 23   |        |
| <i>Brain Radiation</i>                               |           |        |               |           |           |        |      |        |
| Yes                                                  | 5614      | 54.9   | 1892          | 51.2      | 2353      | 58.1   | 1370 | 55.2   |
| No                                                   | 4582      | 41.2   | 1538          | 43.1      | 1641      | 37.5   | 1404 | 43.7   |
| Missing                                              | 426       | 3.9    | 200           | 5.7       | 192       | 4.4    | 35   | 1.1    |
| <i>Brain Radiation Dose, Gy<sup>e</sup></i>          |           |        |               |           |           |        |      |        |
| None                                                 | 4582      | 41.2   | 1538          | 43.1      | 1641      | 37.5   | 1404 | 43.7   |
| 0 to <20                                             | 2055      | 22     | 358           | 9.9       | 1175      | 30     | 522  | 25.2   |
| 20 to <30                                            | 1790      | 16.7   | 1158          | 30.8      | 513       | 12.5   | 119  | 6.6    |
| 30 to <40                                            | 207       | 2      | 76            | 2         | 86        | 2.1    | 46   | 2      |
| 40 to <50                                            | 307       | 2.7    | 121           | 3.2       | 130       | 3      | 56   | 1.8    |
| 50+                                                  | 1255      | 11.5   | 179           | 5.2       | 450       | 10.5   | 627  | 19.6   |
| Median dose <sup>d</sup>                             | 24        |        | 24            |           | 20        |        | 38   |        |
| <i>Abdominal Radiation</i>                           |           |        |               |           |           |        |      |        |
| Yes                                                  | 4352      | 40.2   | 1425          | 39.5      | 1538      | 35.8   | 1388 | 46.8   |
| No                                                   | 5712      | 54.4   | 1959          | 53.6      | 2385      | 58     | 1368 | 50.7   |
| Missing                                              | 559       | 5.4    | 245           | 6.9       | 263       | 6.2    | 52   | 2.5    |
| <i>Abdominal Radiation Dose, Gy<sup>e</sup></i>      |           |        |               |           |           |        |      |        |
| None                                                 | 5712      | 54.4   | 1959          | 53.6      | 2385      | 58     | 1368 | 50.7   |
| 0 to <20                                             | 1591      | 15.7   | 271           | 7.5       | 631       | 15.4   | 688  | 25.2   |
| 20 to <30                                            | 1251      | 10.9   | 432           | 11.7      | 475       | 10.5   | 344  | 10.6   |
| 30+                                                  | 1511      | 13.6   | 723           | 20.2      | 432       | 9.9    | 356  | 11     |
| Median dose <sup>d</sup>                             | 22        |        | 30            |           | 20        |        | 20   |        |
| <i>Anthracycline Dose, mg/m<sup>2</sup></i>          |           |        |               |           |           |        |      |        |
| None                                                 | 4767      | 42.9   | 2322          | 64.1      | 1547      | 35.7   | 899  | 28.7   |
| 0 to <150                                            | 1474      | 15.7   | 225           | 5.7       | 639       | 17.6   | 610  | 24.1   |
| 150 to <300                                          | 2291      | 21.8   | 434           | 11.9      | 974       | 22.7   | 883  | 31.6   |
| 300 to <450                                          | 1566      | 14.7   | 446           | 12.5      | 770       | 17.9   | 350  | 13.2   |
| 450 to <600                                          | 372       | 3.4    | 154           | 4.3       | 187       | 4.4    | 31   | 1.1    |
| 600+                                                 | 71        | 0.7    | 27            | 0.8       | 33        | 0.8    | 10   | 0.4    |
| Median dose <sup>d</sup>                             | 227       |        | 294           |           | 240       |        | 193  |        |



| <i>Cyclophosphamide Equivalent Dose, mg/m<sup>2</sup></i> |      |      |       |      |      |      |      |      |
|-----------------------------------------------------------|------|------|-------|------|------|------|------|------|
| None                                                      | 3237 | 29.7 | 1469  | 40.1 | 1101 | 26.2 | 667  | 22.6 |
| 0 to <4,000                                               | 1401 | 14.1 | 364   | 9.8  | 678  | 16.7 | 360  | 15.5 |
| 4,000 to <8,000                                           | 1692 | 16.1 | 411   | 11.5 | 688  | 15.9 | 593  | 21.6 |
| 8,000 to <12,000                                          | 1618 | 15.7 | 457   | 12.9 | 724  | 18   | 437  | 15.7 |
| 12,000 to <16,000                                         | 1099 | 10.1 | 358   | 9.9  | 503  | 11.6 | 238  | 8.2  |
| 16,000 to <20,000                                         | 589  | 5.4  | 222   | 6.1  | 225  | 5.4  | 142  | 4.7  |
| 20,000+                                                   | 986  | 9    | 348   | 9.7  | 267  | 6.2  | 371  | 11.7 |
| Median dose <sup>d</sup>                                  | 9416 |      | 10813 |      | 9062 |      | 8936 |      |

<sup>a</sup> Unweighted counts (N). Weighted percentages (%) using inverse probability weighting. Numbers may not add up to 100% due to rounding.

<sup>b</sup> Weighted.

<sup>c</sup> Numbers represent an average among 10 imputed treatment datasets and therefore may not add up to 100%.

<sup>d</sup> Median dose is weighted and calculated among those with dose >0.

<sup>e</sup> Chest, brain, and abdominal doses are the maximum tumor dose to the respective regions, taken as the sum of the prescribed dose to all overlapping fields within each region.

**eTable 6. Patient Characteristics and Therapeutic Exposures: Acute Lymphoblastic Leukemia Subgroup**

| Characteristic <sup>a</sup>                               | Overall   |        | Treatment Era |        |           |        |           |        |
|-----------------------------------------------------------|-----------|--------|---------------|--------|-----------|--------|-----------|--------|
|                                                           | 1970-1999 |        | 1970-1979     |        | 1980-1989 |        | 1990-1999 |        |
|                                                           | N         | %      | N             | %      | N         | %      | N         | %      |
| Participants                                              | 5794      | 100    | 1726          | 19.7   | 2674      | 36.6   | 1394      | 43.7   |
| <i>Sex</i>                                                |           |        |               |        |           |        |           |        |
| Male                                                      | 3116      | 56.1   | 891           | 53.9   | 1448      | 56     | 777       | 57.1   |
| Female                                                    | 2678      | 43.9   | 835           | 46.1   | 1226      | 44     | 617       | 42.9   |
| <i>Age at diagnosis, years</i>                            |           |        |               |        |           |        |           |        |
| 0 to 4                                                    | 2978      | 54.9   | 924           | 53.9   | 1441      | 55.8   | 613       | 54.7   |
| 5 to 9                                                    | 1494      | 28     | 498           | 28.9   | 691       | 27.2   | 305       | 28.3   |
| 10 to 14                                                  | 898       | 11.9   | 215           | 12.2   | 374       | 11.9   | 309       | 11.8   |
| 15 to 19                                                  | 424       | 5.1    | 89            | 5      | 168       | 5.1    | 167       | 5.2    |
| Mean (Range)                                              | 5.5       | (0-20) | 5.6           | (0-20) | 5.4       | (0-20) | 5.5       | (0-20) |
| <i>Follow-up (years since diagnosis)<sup>b</sup></i>      |           |        |               |        |           |        |           |        |
| Mean (Range)                                              | 20.1      | (5-39) | 27.4          | (5-39) | 21.3      | (5-30) | 15.7      | (5-24) |
| <i>Attained age<sup>b</sup></i>                           |           |        |               |        |           |        |           |        |
| Mean (Range)                                              | 25.5      | (5-55) | 33.0          | (5-55) | 26.7      | (6-48) | 21.2      | (7-41) |
| <i>Treatment Subgroup<sup>c</sup></i>                     |           |        |               |        |           |        |           |        |
| None                                                      | 4         | 0.1    | 1             | 0.1    | 1         | 0      | 1         | 0.1    |
| Surgery only                                              | 0         | 0      | 0             | 0      | 0         | 0      | 0         | 0      |
| Chemotherapy alone                                        | 2496      | 54.9   | 287           | 17.2   | 1198      | 48.1   | 1011      | 77.6   |
| Radiotherapy alone                                        | 4         | 0.1    | 1             | 0      | 3         | 0.2    | 0         | 0      |
| Chemoradiotherapy                                         | 3290      | 45     | 1437          | 82.7   | 1471      | 51.7   | 382       | 22.3   |
| <i>Treatment Exposures<sup>c</sup></i>                    |           |        |               |        |           |        |           |        |
| <i>Chest Radiation</i>                                    |           |        |               |        |           |        |           |        |
| Yes                                                       | 603       | 9.1    | 259           | 14.7   | 226       | 8.6    | 118       | 7.1    |
| No                                                        | 4585      | 82.9   | 1210          | 69.8   | 2141      | 81.5   | 1234      | 90     |
| Missing                                                   | 606       | 8      | 257           | 15.5   | 307       | 9.9    | 42        | 2.9    |
| <i>Chest Radiation Dose, Gy<sup>e</sup></i>               |           |        |               |        |           |        |           |        |
| None                                                      | 4585      | 82.9   | 1210          | 69.8   | 2141      | 81.5   | 1234      | 90     |
| 0 to <20                                                  | 414       | 7      | 94            | 5.4    | 206       | 7.9    | 114       | 6.9    |
| 20 to <30                                                 | 173       | 1.9    | 154           | 8.6    | 16        | 0.5    | 3         | 0.2    |
| 30+                                                       | 16        | 0.2    | 11            | 0.6    | 4         | 0.2    | 1         | 0      |
| Median dose <sup>d</sup>                                  | 15        |        | 22            |        | 13        |        | 13        |        |
| <i>Brain Radiation</i>                                    |           |        |               |        |           |        |           |        |
| Yes                                                       | 3194      | 43.2   | 1421          | 81.7   | 1414      | 49.2   | 359       | 20.7   |
| No                                                        | 2600      | 56.8   | 306           | 18.3   | 1260      | 50.8   | 1035      | 79.3   |
| Missing                                                   | 0         | 0      | 0             | 0      | 0         | 0      | 0         | 0      |
| <i>Brain Radiation Dose, Gy<sup>e</sup></i>               |           |        |               |        |           |        |           |        |
| None                                                      | 2600      | 56.8   | 306           | 18.3   | 1260      | 50.8   | 1035      | 79.3   |
| 0 to <20                                                  | 1536      | 22.7   | 308           | 18.3   | 957       | 33.8   | 270       | 15.3   |
| 20 to <30                                                 | 1483      | 18.3   | 1018          | 58     | 392       | 13.2   | 74        | 4.6    |
| 30 to <40                                                 | 93        | 1.3    | 36            | 2.1    | 42        | 1.5    | 14        | 0.9    |
| 40 to <50                                                 | 76        | 0.9    | 54            | 3      | 22        | 0.7    | 1         | 0      |
| 50+                                                       | 6         | 0.1    | 5             | 0.3    | 1         | 0      | 0         | 0      |
| Median dose <sup>d</sup>                                  | 21        |        | 24            |        | 18        |        | 18        |        |
| <i>Abdominal Radiation</i>                                |           |        |               |        |           |        |           |        |
| Yes                                                       | 581       | 8.8    | 260           | 14.8   | 207       | 7.8    | 114       | 6.8    |
| No                                                        | 4608      | 83.3   | 1209          | 69.7   | 2161      | 82.4   | 1238      | 90.2   |
| Missing                                                   | 605       | 7.9    | 257           | 15.5   | 306       | 9.8    | 42        | 3      |
| <i>Abdominal Radiation Dose, Gy<sup>e</sup></i>           |           |        |               |        |           |        |           |        |
| None                                                      | 4608      | 83.3   | 1209          | 69.7   | 2161      | 82.4   | 1238      | 90.2   |
| 0 to <20                                                  | 406       | 6.8    | 103           | 5.9    | 193       | 7.4    | 110       | 6.7    |
| 20 to <30                                                 | 161       | 1.8    | 146           | 8.1    | 11        | 0.3    | 4         | 0.2    |
| 30+                                                       | 14        | 0.2    | 11            | 0.7    | 3         | 0.1    | 0         | 0      |
| Median dose <sup>d</sup>                                  | 15        |        | 22            |        | 12        |        | 13        |        |
| <i>Anthracycline Dose, mg/m<sup>2</sup></i>               |           |        |               |        |           |        |           |        |
| None                                                      | 2546      | 35.6   | 1134          | 66.1   | 1227      | 41.8   | 185       | 16.6   |
| 0 to <150                                                 | 1421      | 33.8   | 155           | 8.3    | 572       | 26.7   | 694       | 51.4   |
| 150 to <300                                               | 991       | 18.7   | 158           | 9      | 425       | 15.5   | 409       | 25.8   |
| 300 to <450                                               | 591       | 8.7    | 167           | 9.9    | 327       | 11.7   | 97        | 5.6    |
| 450 to <600                                               | 196       | 2.5    | 94            | 5.6    | 97        | 3.3    | 5         | 0.4    |
| 600+                                                      | 50        | 0.7    | 19            | 1.2    | 27        | 1      | 4         | 0.3    |
| Median dose <sup>d</sup>                                  | 170       |        | 281           |        | 175       |        | 108       |        |
| <i>Cyclophosphamide Equivalent Dose, mg/m<sup>2</sup></i> |           |        |               |        |           |        |           |        |
| None                                                      | 2628      | 43.6   | 1109          | 64.5   | 1055      | 40.8   | 463       | 36.4   |
| 0 to <4,000                                               | 1481      | 29     | 220           | 12.8   | 771       | 28.2   | 491       | 37     |
| 4,000 to <8,000                                           | 662       | 10.7   | 134           | 7.9    | 326       | 11.3   | 202       | 11.6   |
| 8,000 to <12,000                                          | 602       | 11     | 92            | 5.4    | 314       | 12.4   | 195       | 12.4   |
| 12,000 to <16,000                                         | 168       | 2.5    | 37            | 2      | 103       | 3.6    | 28        | 1.8    |
| 16,000 to <20,000                                         | 107       | 1.4    | 48            | 2.6    | 52        | 1.9    | 7         | 0.4    |
| 20,000+                                                   | 147       | 1.8    | 86            | 4.8    | 53        | 1.8    | 8         | 0.4    |
| Median dose <sup>d</sup>                                  | 4222      |        | 6653          |        | 4198      |        | 3860      |        |

<sup>a</sup> Unweighted counts (N). Weighted percentages (%) using inverse probability weighting. Numbers may not add up to 100% due to rounding.

<sup>b</sup> Weighted.

<sup>c</sup> Numbers represent an average among 10 imputed treatment datasets and therefore may not add up to 100%.

<sup>d</sup> Median dose is weighted and calculated among those with dose >0.

<sup>e</sup> Chest, brain, and abdominal doses are the maximum tumor dose to the respective regions, taken as the sum of the prescribed dose to all overlapping fields within each region.
